# Supplementary material for: From Prestige to Author-Centricity: Introducing and Validating the Author-Centric Journal Selection Index (AJSI)
Source: Research Square preprint supplement (doi:10.21203/rs.3.rs-8339562/v1), 2025-12-23
Supplement: Supplementary file 1 [file 71ce1be03d1917c3f0dc10a4.xlsx]

## Sheet: Original_Raw_Data
Index	Journal Name	ISSN (Print)	ISSN (Online)	journal_category	Category	Publisher	ABDC Ranking	Scopus_Quartile	Impact_Factor	citescore	sjr_index	h_index	cites_doc	Scopus_Category	Years Since Publication	Frequency_of_Publication	Total_Yearly_ Submissions	Acceptance_Rate	%age_Desk_Rejection	Desk Adjusted Submission	Geographic_Impact (%ge Global_Citation)	International_Collaboration	Cross_Referencing	word_count	Sub_to_Desk_Rejection	Sub_to_First_Decision	Accept_to_Publication	Open_Access_APC	Composite_Submission_Effort	Subscription_Available	OA Embargo Months	DOAJ_Seal	URL	Does the journal comply to DOAJ's definition of open access?	Est Year	Years	is_predatory	Scope	N_IF	N_CS	N_SJR	N_SQ	N_APC	N_SE	N_SA	N_GOA	N_DS	N_TFD	N_TAP
676	Journal of Blood Service Economics	2772-5955		Business & Management (General)		Emrald								1 category: Blood	2	Quarterly	150	100	70	0	50.6	75.1	32.6	8000	14–30	40	0	3350	Easy	Diamond OA	0		https://onlinelibrary.wiley.com/journal/26946440	No	2023	2	No	Focuses on the economic analysis, policy, and management of blood transfusion services and blood supply.	0	0	0	0	0	1	1	0	0	0	0
339	Strategic Direction	0258-0543	1758-4753	Economics		Emrald		Q4		1.2	0.11	19		1 category: Strategy	22	Quarterly	200	100	50	0	66.8	69.1	13.2	8000	5–10	9	0	4480	Easy	Hybrid	12		https://www.emeraldgrouppublishing.com/journal/sd	No	2003	22	No	A practice-oriented journal providing analysis of global trends and strategic management issues for executives.	0	0	0	0	0	1	1	0	0	0	0.973
916	Journal of Generic Medicines: The Business Journal for the Generic Medicines Sector	1741-1343	1741-7090	Information Systems & Digital Business		Sage								1 category: Generic	19	Quarterly	150	100		0	72.7	49.9	29.7	8000		77	22	3000		Hybrid	12		#N/A	No	2006	19	No	Focuses on the business, economic, and policy aspects of the generic medicines industry.	0	0	0	0	0.746	1	0	0	0	0	1
37	Railway Sciences	2772-7362	2772-7370	Business & Management (General)		Emrald						15		1 category: Transportation	3	Quarterly	180	98	58	0.0453671	63.4	42.9	6.9	8000	7–14	26	0	2040	Moderate	Gold OA	0		https://www.emeraldgrouppublishing.com/journal/rs	Yes	2022	3	No	Publishes research on the engineering, technology, operations, and science of railway systems.	0.045	0.084	0.046	0.75	0	1	0	0	0	0.797	0.797
753	Mental Health and Digital Technologies	2752-6467	2752-6475	Sustainability & Environmental Management		Emrald								2 categories: Mental + Digital	1	Quarterly	200	93.3	62	0.155125	79.1	70.1	24.1	9000	10–21	49	0	3920	Moderate	Hybrid	0		https://www.emeraldgrouppublishing.com/journal/mhdt	No	2024	1	No	Focuses on research on the use, impact, and ethics of digital technologies in mental health care and well-being.	0.265	0	0	0	0	1	0	0	0	0.862	0
105	IBRO Neuroscience Reports	2667-2421		Education Management		Elsevier		Q3	2.9			17		1 category: Neuroscience	6	Quarterly	500	92	48	0.216954	51.2	71.1	11.1	8000	5–10	0	14	3840	Easy	Gold OA	0		https://www.sciencedirect.com/journal/ibro-neuroscience-reports	No	2019	6	No	Publishes short, rapid reports on basic and translational neuroscience research across all domains.	0.075	0	0	0	0	1	1	0	0	0.785	0
546	Asia-Pacific Journal of Management Research and Innovation	2319-510X	2320-7298	Engineering & Technology		Sage								2 categories: Management + Regional	10	Quarterly	250	89.5	70	0.253546	82.2	48.3	27.9	9000	14–30	0	0	3000		Hybrid	12		https://journals.sagepub.com/home/abr	No	2015	10	No	Publishes theoretical and empirical papers disseminating new knowledge in management, IT, and related disciplines, with an Asia-Pacific focus.	0	0	0	0	0	1	1	0	0	0.847	0
566	Possibility Studies & Society	2768-1558		Operations & Supply Chain		Sage								1 category: Possibility	2	Quarterly	200	88.6	65	0.264022	46.8	69.1	36.7	8000	10–21	49	28	3000	Moderate	Gold OA	0		https://journals.sagepub.com/home/pss	Yes	2023	2	No	Focuses on the study of possibility, futures, and imagination, examining how individuals and groups envision and work toward potential realities.	0.157	0.142	0.058	1	0.374	1	0	0	0	0.891	0
795	PDS Partners: Bridging Research to Practice	2752-6521		Business & Management (General)		Emrald								2 categories: Research + Practice	7	Quarterly	200	88.5	60	0.266206	73.7	50.6	18.4	8000	7–14	41	0		Moderate	Diamond OA	0		https://www.pdspartners.org/journal	No	2018	7	No	Focuses on the Partnership for Democracy and Self-Governance (PDS) model, bridging educational research and practical application.	0.228	0.236	0.072	1	0	1	0	0	0	0.985	0.98
137	Tizard Learning Disability Review	1363-2642		Business & Management (General)	Psychology	Emrald		Q3	7	1.3	0.267	19	0.43	1 category: Disability	29	Quarterly	200	85.3	55	0.340112	55.6	63.3	10.5	8000	7–14	96	0		Moderate		0		https://www.emeraldgrouppublishing.com/journal/tldr	Yes	1996	29	No	Provides an authoritative forum for discussion and debate on policy and practice for people with learning disabilities and their families.	0.045	0.149	0.048	1	0.524	1	1	0	0	0.962	0
910	Smart and Resilient Transportation	2772-861X	2772-8628	Engineering & Technology		Emrald		Q3			0.21			2 categories: Smart + Transport	3	Quarterly	400	85.7		0.372095	52.4	70.4	15.9	8000		50	0	3020	Easy	Diamond OA	0		#N/A	No	2022	3	No	Focuses on research on smart transportation systems, resilience, and technologies for efficient and robust networks.	0.276	0.413	0.274	1	0	0.905	1	0	0	0.915	0.784
114	Annals of Anthropological Practice	1559-9949	1559-9957	Marketing		Wiley			0.6			20		1 category: Anthropology	18	Quarterly	180	80	60	0.453761	80.6	62.2	12.4	8000	10–21	66	0	4760	Moderate	Hybrid	12		https://anthrosource.onlinelibrary.wiley.com/journal/21539588	No	2007	18	No	Focuses on research and case studies related to the practical application of anthropology in various fields, including policy and consulting.	0.045	0.058	0.037	1	0	1	1	0	0	0.991	0.919
459	International Journal of Energy Sector Management	1750-6220	1750-6239	Entrepreneurship & Innovation	Energy	Emrald	C	Q2	3.3	5.1	0.589	29	4.32	1 category: Energy	18	Quarterly	350	79.6	65	0.522363	64.3	68.7	12.8	8000	10–21	70	0	4850	Moderate	Hybrid	12		https://www.emeraldgrouppublishing.com/journal/ijesm	No	2007	18	No	Focuses on management, policy, and strategy issues within the global energy sector.	0	0	0	0	0	1	0	0	0	0.929	0
775	Engineering Sustainability	1478-4629	1751-829X	Business & Management (General)		Emrald		Q2	2.5		0.78			2 categories: Engineering + Sustainability	7	Quarterly	400	80	65	0.523795	78.8	69.4	17.6	10000	10–21	59	0	2200	Moderate	Hybrid	12		https://www.icevirtuallibrary.com/journal/jensu	No	2018	7	No	Focuses on sustainable development and environmental issues within engineering and built environment contexts.	0.052	0.065	0.021	0.75	0.397	0.976	1	0	0	0.868	0
1053	Chemosphere	0045-6535	1879-1298	Strategy & International Business	Chemistry	Elsevier		Q1	8.8	13.3	1.727	288	9.63	1 category: Chemistry	51	Biweekly	10000	85.6	70	0.580032	76.4	74.4	37.2	8000	14–30	2	2	2970	Moderate	Hybrid	0		#N/A	Yes	1974	51	No	A premier journal focusing on research on environmental chemistry, pollution, and toxicology.	0.146	0.161	0.03	1	0	1	0	0	0	0.974	0
177	European Labour Law Journal	2031-9525	2032-4740	Business & Management (General)		Sage		Q2	1.9		0.59	8		1 category: Labour Law	15	Quarterly	250	72.5	65	0.66372	55.2	65.8	14.7	8000	10–21	40	27	4460	Moderate	Hybrid	0		https://journals.sagepub.com/home/ell	No	2010	15	No	Focuses on research and analysis of labor law, industrial relations, and employment policy in Europe.	0.183	0.168	0.088	1	0	1	0	0	0	0.979	0
599	The Review of Socionetwork Strategies	1867-0245	1867-0253	Business & Management (General)		Springer			1			25		1 category: Socionetwork	18	Quarterly	250	70	62	0.723842	70	49.9	30.7	8000	10–21	17	0	3290	Moderate	Hybrid	0		https://link.springer.com/journal/12626	No	2007	18	No	Focuses on research on social network analysis and strategies in various social and organizational contexts.	0.291	0.332	0.189	1	0	1	1	0	0	0.859	0
680	Advances in Business and Management Research	2472-8806	2472-8814	Strategy & International Business		Elsevier								1 category: Business	11	Quarterly	300	70	58	0.747447	74.1	66.1	20.5	8000	7–14	0	0	1000	Moderate	Gold OA	0		https://www.atlantis-press.com/journals/abmr	No	2014	11	No	Often a proceedings series, covering theories and methods in economics, business, and management research, including finance, marketing, and HR.	0.269	0	0	0	0.203	1	0	0	0	0	0.959
731	Journal of Electronic Business & Digital Economics	2752-7242	2752-7250	Business & Management (General)		Emrald								2 categories: Electronic + Economics	2	Quarterly	350	70	58	0.767647	72.2	73	22.3	8000	7–14	60	0		Moderate	Diamond OA	0		https://www.emeraldgrouppublishing.com/journal/jebde	No	2023	2	No	Publishes research on electronic business, e-commerce, and the economics of the digital economy.	0.045	0.072	0.077	1	0	1	1	0	0	0.962	0.973
90	Evaluation Journal of Australasia	1035-719X	2041-0114	Sustainability & Environmental Management		Sage		Q3		1.6	0.18	15		2 categories: Evaluation + Regional	23	Quarterly	180	63.9	60	0.819038	54.9	43.1	10.9	8000	10–21	29	16		Moderate		12		https://journals.sagepub.com/home/evj	No	2002	23	No	Publishes research and practice-based articles related to program, policy, and organizational evaluation within the Australasian context and internationally.	0.22	0.214	0.05	1	0.28	1	0	0	0	0.994	0.986
911	Social Transformations in Chinese Societies	2516-7243	2516-7251	Business & Management (General)		Emrald		Q3		2.2	0.18			1 category: China	14	Quarterly	250	65.2		0.834483	57.9	72	19.3	8000		39	0	2500	Moderate	Hybrid	0		#N/A	No	2011	14	No	Publishes research on social change, policy, and contemporary social issues in Chinese societies.	0	0	0	0	0	1	1	0	0	0.876	0.872
223	Continuity & Resilience Review	2634-8071	2634-808X	Business & Management (General)		Emrald						15		1 category: Resilience	14	Quarterly	200	63.2	60	0.85186	57.8	64.3	9.8	8000	7–14	49	0	4290	Moderate		0	Seal	https://www.emeraldgrouppublishing.com/journal/crr	Yes	2011	14	No	Focuses on research and practice related to business continuity, organizational resilience, and disaster recovery.	0.015	0.036	0.016	0.25	0.583	1	0	0	0	0.921	0.912
743	Journal of Management Scientific Reports	2158-2440	2158-2440	Business & Management (General)		Sage								1 category: Management	3	Quarterly	250	64	62	0.868611	83.6	69.7	23.2	8000	10–21	28	22	2500		Gold OA	0		https://www.emeraldgrouppublishing.com/journal/jmsr	No	2022	3	No	Covers a broad range of management research topics, likely focused on rapid dissemination of scientific findings and replications.	0.246	0.284	0.089	1	0.16	1	0	0	0	0.903	0
672	Consumer Psychology Review	2577-632X	2577-6338	Operations & Supply Chain		Wiley								1 category: Consumer Psych	8	Quarterly	200	58	70	0.973198	82.2	68	16.8	8000	14–30	48	0	3470	Lengthy	Hybrid	12		https://onlinelibrary.wiley.com/journal/24761392	No	2017	8	No	Publishes high-level review articles that synthesize existing research and highlight future directions in consumer psychology.	0	0	0	0	0	1	1	0	0	0.638	0
99	Working with Older People	1368-146X	2042-8738	HRM & Organizational Behavior		Emrald		Q3		1.4	0.14	16		1 category: Gerontology	28	Quarterly	250	59.3	50	0.980841	61	61.6	11.6	8000	7–14	107	0	3880	Easy	Hybrid	0		https://www.emeraldgrouppublishing.com/journal/wwop	Yes	1997	28	No	Focuses on research and practice related to social work, health, and care services for older adults.	0.134	0.099	0.026	1	0	1	0	0	0	0.891	0
933	Board & Administrator For Administrators Only	0735-8664		Business & Management (General)		Wiley								1 category: Board	40	Quarterly	100	50		1	67.9	52.8	22.4	8000		0	0						#N/A	No	1985	40	No	Likely a practitioner-focused publication providing practical advice and best practices for non-profit and association administrators and board members.	0.179	0.007	0.011	1	0.4	1	1	0	0	0.865	0
393	The Journal of Adult Protection	1466-8202	1758-662X	Business & Management (General)		Emrald			1			22		1 category: Protection	26	Quarterly	250	57.9	58	1.01539	67.1	66.1	16.7	8000	7–14	38	0	3300	Moderate	Hybrid	0		https://www.emeraldgrouppublishing.com/journal/jap	No	1999	26	No	Focuses on research and practice related to the protection of vulnerable adults from abuse, neglect, and exploitation.	0	0	0	0	0	1	0	0	0	0	0
40	Marine Economics and Management	2589-3259	2589-3267	Tourism & Hospitality		Emrald		Q3			0.26			Multi Category	6	Quarterly	200	55.6	70	1.02881	53.8	37.5	24.8	8000	14–30	31	0		Lengthy	Diamond OA	0		#N/A	No	2019	6	No	Dedicated to research on the economics, policy, and management of marine and coastal resources and industries.	0	0	0	0.75	0	1	1	0	0	0.924	0
770	School-University Partnerships	2769-125X	2769-1268	Business & Management (General)		Emrald								1 category: Partnerships	18	Quarterly	200	55.3	58	1.03453	81.4	66.4	15.1	8000	7–14	62	0	3630	Moderate	Diamond OA	0		https://www.emeraldgrouppublishing.com/journal/sup	No	2007	18	No	Dedicated to research on the theory and practice of collaboration between schools and universities (e.g., teacher education, research).	0.067	0.113	0.037	0.75	0	1	1	0	0	0.959	0.932
348	Research Journal of Textile and Apparel	2515-8090	2515-8090	Accounting & Finance	Business, Management and Accounting	Emrald		Q2	1.9	2.2	0.375	20	2.08	1 category: Textile	28	Quarterly	200	53.5	60	1.0764	57.9	48.9	13.6	10000	7–14	56	0	2500	Moderate	Hybrid	0		https://www.emerald.com/rjta	No	1997	28	No	Publishes research on textile science, apparel technology, fashion, and the textile supply chain.	0.172	0	0	1	0	1	1	0	0	0.991	0.966
518	Industrial Lubrication and Tribology	0036-8792	1758-3792	Business & Management (General)	Energy	Emrald		Q3	1.8	2.9	0.353	36	1.67	1 category: Lubrication	77	Quarterly	500	60.3	60	1.07792	56	67.6	22.1	8000	7–14	34	0	3750	Moderate		0		https://www.emeraldgrouppublishing.com/journal/ilt	No	1948	77	No	Focuses on research on lubrication, tribology (friction and wear), and their application in industrial systems.	0.075	0.089	0.025	1	0	1	1	0	0	0.868	0
778	Management, Procurement and Law	1751-4324	1751-4332	Economics		Emrald			1.1			15		0	13	Quarterly	200	53		1.08148	66.3	67.6	16.5	8000		70	0		Moderate		12		https://www.icevirtuallibrary.com/journal/jmapl	No	2012	13	No	Focuses on the legal, contractual, and managerial aspects of procurement and contracting in engineering and construction.	0.205	0	0	0	0	1	1	0	0	0.894	0
302	Social Sciences & Humanities Open	2590-2916		Business & Management (General)		Elsevier		Q2		4		33		Multi Category	5	Continuous	500	60	50	1.08499	49.8	68	14.3	10000	5–10	19	9	1700	Moderate	Gold OA	0		https://www.sciencedirect.com/journal/social-sciences-and-humanities-open	No	2020	5	No	An open-access journal covering all areas of the social sciences and humanities, facilitating broad dissemination of diverse research.	0.123	0.089	0.03	1	0.731	1	1	0	0	0.829	0
25	Journal of Ethics in Entrepreneurship and Technology	2633-7444	2633-7452	Entrepreneurship & Innovation		Emrald						6		Multi Category	4	Quarterly	220	53.5	60	1.09576	53.4	59.7	26.3	8000	10–21	29	0	2500	Moderate	Hybrid	0		https://www.emeraldgrouppublishing.com/journal/jeet	No	2021	4	No	Focuses on research on the ethical issues in entrepreneurship, innovation, and technology development.	0	0	0	1	0	1	0	0	0	0.959	0
627	Machine Learning and Data Science in Geotechnics	2772-5181	2772-519X	Accounting & Finance		Emrald								2 categories: ML + Geotechnics	0	Quarterly	250	54.5	65	1.09815	58.3	74.4	14.5	8000	10–21	35	0	3000	Moderate	Gold OA	0		https://link.springer.com/journal/44243	No	2025	0	No	Focuses on the application of machine learning, AI, and data science techniques in geotechnical engineering.	0.09	0.06	0.083	1	0.079	1	1	0	0	0.968	0.959
693	China Political Economy	2673-3051	2673-306X	Business & Management (General)		Emrald								1 category: China	3	Quarterly	250	54.5	68	1.09848	57.7	74.1	27.6	8000	14–28	35	0		Moderate	Diamond OA	0		https://www.emeraldgrouppublishing.com/journal/cpe	No	2022	3	No	Focuses on research and analysis of political and economic issues and policy in China.	0.116	0	0	0	0	1	0	0	0	0.826	0
624	Discover Sustainability	2730-6197		Sustainability & Environmental Management		Springer		Q1	3	2.6	0.61	18		2 categories: Sustainability + Discovery	5	Quarterly	600	60	60	1.11793	72.1	73.3	19.6	8000	7–14	16	0	1390	Easy	Gold OA	0		https://link.springer.com/journal/43621	No	2020	5	No	An open-access journal covering all areas of sustainability, facilitating interdisciplinary research on global challenges.	0.28	0	0	1	0	1	1	0	0	0	0
131	Irish Journal of Occupational Therapy	1754-0739	1754-0747	Education Management		Emrald		Q3		1.6	0.28	9		1 category: Occupational Therapy	52	Quarterly	200	51.4	58	1.12479	57	62.2	12.6	9000	7–14	60	0	2900	Moderate		0		https://www.emeraldgrouppublishing.com/journal/ijot	No	1973	52	No	Publishes research and practice articles on occupational therapy in the Irish and international contexts.	0.257	0.175	0.174	1	0.397	1	1	0	0	0.9	0.777
340	Strategic HR Review	1475-4393	1758-5787	Entrepreneurship & Innovation		Emrald						25		1 category: HR	23	Quarterly	300	54	55	1.14574	81.3	66.4	11.9	8000	7–14	8	0	3520	Easy	Hybrid	12		https://www.emeraldgrouppublishing.com/journal/shr	No	2002	23	No	Focuses on research and thought leadership on strategic Human Resources Management (HRM) and its link to business strategy.	0.108	0.156	0.112	1	0.474	0.952	0	0	0	0.835	0.851
429	Global Knowledge, Memory and Communication	2514-6663	2514-6671	Business & Management (General)	Social Sciences	Emrald	B		2.4	2.9	0.354	35	1.93	0	8	Bimonthly	250	51.8		1.15581	55.2	68.3	15.2	8000		101	0	2500	Easy	Hybrid	0		https://www.emeraldgrouppublishing.com/journal/gkmc	No	2017	8	No	Focuses on research on knowledge creation, organizational memory, and communication in a global, technology-driven context.	0.254	0	0	0	0	1	0	0	0	0.935	0
564	Journal of Operations and Strategic Planning	2516-600X		Entrepreneurship & Innovation		Sage								1 category: Operations	7	Quarterly	250	52	68	1.15884	56.3	46.9	32.1	8000	14–28	0	0	3000	Moderate	Hybrid	0		https://journals.sagepub.com/home/osp	No	2018	7	No	Publishes research on operations management, strategic planning, and their alignment in organizations.	0.082	0.077	0.024	1	0	1	0	0	0	0.974	0.986
214	Anti-Corrosion Methods and Materials	0003-5599	1758-1544	Business & Management (General)	Chemical Engineering	Emrald		Q2	2.6	2.2	0.262	35	1.29	1 category: Materials	72	Quarterly	500	57.3	58	1.15914	84.5	64	12.1	8000	7–14	30	0	4060	Moderate		12		https://www.emeraldgrouppublishing.com/journal/acmm	No	1953	72	No	Focuses on research on corrosion science, prevention, materials, and protection methods.	0	0.18	0.047	1	0.269	0.976	1	0	0	0	0
342	Journal of Information Technology Teaching Cases	2043-886X		Education Management		Sage		Q2		2.2	0.23	13		2 categories: IT + Education	14	Quarterly	150	46.8	58	1.1644	57.3	68	15.8	8000	7–14	37	16	2500	Moderate	Hybrid	0		https://www.palgrave.com/gp/journal/41266	No	2011	14	No	Publishes case studies suitable for teaching information technology and information systems to university-level students and executive education participants.	0.097	0.142	0.096	1	0.372	0.952	1	0	0	0.888	0.912
926	Journal of Intelligent Manufacturing and Special Equipment	2633-660X	2633-6618	Economics		Emrald		Q3			0.2			1 category: Manufacturing	5	Quarterly	300	52.9		1.16672	66.5	70.4	15.4	8000		48	0	2500		Hybrid	12		#N/A	Yes	2020	5	No	Publishes research on intelligent manufacturing systems, automation, and specialized industrial equipment.	0.078	0.118	0.09	1	0.382	1	1	0	0	0.944	0.98
39	IIMT Journal of Management	0973-7743	2394-8090	Business & Management (General)		Emrald								1 category: Management		Quarterly	150	46.6	68	1.16993	87.4	32.9	12.7	8000	14–30	97	0		Lengthy	Diamond OA	0		https://www.iimtobu.ac.in/journal	No			No	Publishes research on management and business administration (likely associated with a specific IIMT institution).	0.097	0.144	0.044	1	0	1	0	0	0	0	0.98
374	Journal of the American Water Resources Association	1087-3561	1752-1688	Education Management	Earth and Planetary Sciences	Wiley		Q1	2.2	4.8	0.654	118	2.1	1 category: Water	60	Quarterly	600	58	70	1.17499	69.4	71.6	20.8	8000	10–21	83	0	3500	Moderate	Hybrid	0		https://onlinelibrary.wiley.com/journal/17521688	No	1965	60	No	Publishes research on water resources science, policy, and management.	0.131	0.156	0.058	0.75	0	1	1	0	0	0.953	0.973
719	International Journal of Prison Health	1744-9200	1744-9219	Business & Management (General)		Emrald		Q2	1.3		0.69			1 category: Prison	10	Quarterly	300	52.2	65	1.19176	74.1	75.1	34.5	8000	10–21	108	0	2500	Moderate	Hybrid	12		https://www.emeraldgrouppublishing.com/journal/ijph	No	2015	10	No	Dedicated to research on the health, healthcare, and public health issues within correctional facilities.	0.358	0.377	0.169	1	0.308	0.952	1	1	0	0.965	0.953
176	Journal of Entrepreneurship and Innovation in Emerging Economies	2393-9575	2394-9852	Business & Management (General)		Sage		Q2		3.7	0.31	14		2 categories: Entrepreneurship + Emerging	10	Quarterly	300	52.2	68	1.19212	60.4	38.9	11.9	8000	14–28	0	0		Lengthy		0		https://journals.sagepub.com/home/eie	Yes	2015	10	No	Publishes research specific to entrepreneurship, innovation, and economic development in emerging economies, addressing unique challenges and opportunities.	0.078	0	0	0	0.432	1	1	0	0	0.968	0.939
372	Thunderbird International Business Review	1096-4762	1520-6874	Business & Management (General)	Social Sciences	Wiley	B	Q1	3.2	4.2	0.557	45	2.62	1 category: International	66	Quarterly	300	52	65	1.19675	62.5	69.1	23.2	8000	10–21	148	0	3460	Moderate	Hybrid	12		https://onlinelibrary.wiley.com/journal/15206874	No	1959	66	No	Publishes articles focused on global business and management issues, bridging theory and practice for a global audience.	0	0	0	0.75	0.361	1	0	0	0	0.824	0
405	Journal of European Real Estate Research	1753-9394	1753-9408	Business & Management (General)	Economics, Econometrics and Finance	Emrald	C	Q3	9	2.4	0.462	18	1.63	1 category: Real Estate	17	Quarterly	300	51.4	65	1.21171	66	68	18.9	8000	10–21	45	0	2500	Moderate	Hybrid	12		https://www.emerald.com/jerer	No	2008	17	No	Aims to provide a forum for high-quality research on European real estate markets, covering investment, finance, valuation, economics, and policy.	0.06	0	0	0	0	1	0	0	0	0.959	0
435	Journal of Integrated Care	1746-655X	1746-6568	Entrepreneurship & Innovation	Social Sciences	Emrald		Q2	9	1.6	0.303	21	1.01	2 categories: Health + Integration	22	Quarterly	250	49.4	60	1.22064	55	66.1	17.8	8000	7–14	52	0	3040	Moderate	Hybrid	12		https://www.emeraldgrouppublishing.com/journal/jica	No	2003	22	No	Publishes research and practice articles on the integration of health and social care services, focusing on policy, commissioning, and service delivery models.	0	0	0	0	0	1	0	0	0	0.876	0
700	Emerging Markets Case Studies	2045-0672	2045-0680	Education Management		Emrald		Q3		1.9				1 category: Cases	14	Quarterly	250	46.6	62	1.28844	66.8	73	24.7	8000	10–21	74	0	1500	Moderate	Gold OA	12		https://www.emeraldgrouppublishing.com/journal/emcs	No	2011	14	No	Publishes teaching cases focused on business and management issues in emerging market economies.	0	0	0	0.75	0	1	1	0	0	0.982	0.926
975	International Journal of Wine Business Research	1751-1070	1751-1070	Accounting & Finance	Business, Management and Accounting	Emrald	B	Q2	2.7	4.3	0.501	42	3.32	Specialized	22	Quarterly	350	48.8		1.30256	71.9	76.7	28.9	8000		66	0	2500	Easy	Hybrid	12		https://www.emeraldgrouppublishing.com/journal/ijwbr	Yes	2003	22	No	Dedicated to research on the management, marketing, and economics of the global wine business.	0.06	0.065	0.023	0.5	0	1	1	0	0	0.982	0
763	Responsible Enterprise Pedagogy	2772-7478	2772-7486	Business & Management (General)		Emrald								2 categories: Responsible + Pedagogy	1	Quarterly	150	40	60	1.31349	66	70.1	20.9	8000	7–14	0	0		Moderate		0		https://www.emeraldgrouppublishing.com/journal/rep	No	2024	1	No	Focuses on research on pedagogy, curriculum, and teaching methods for responsible business and enterprise education.	0.175	0	0	0	0.519	1	0	0	0	0.821	0
660	Board Leadership	1090-0827		Operations & Supply Chain		Wiley								1 category: Board	29	Quarterly	150	40	60	1.31349	77.1	72.3	29.6	10000	7–14	0	0		Moderate		12		https://onlinelibrary.wiley.com/journal/15427768	No	1996	29	No	Focuses on issues, research, and best practices concerning corporate governance, board effectiveness, and the leadership role of boards of directors.	0	0	0	0	0	1	0	0	0	0	0
636	Management Report for Nonunion Organizations	2041-6902		Engineering & Technology		Wiley								1 category: Nonunion	80	Quarterly	150	40	60	1.31349	70.8	68	33.8	8000	7–14	0	0		Moderate		0		https://onlinelibrary.wiley.com/journal/10991528	No	1945	80	No	Likely a practitioner-focused publication providing management advice, legal guidance, and HR strategies for workplaces without union representation.	0	0	0	0	0	1	1	0	0	0.897	0.912
779	Municipal Engineer	0965-0903	2044-7833	Marketing		Emrald		Q3	8	1.8		15		1 category: Municipal	152	Quarterly	180	42	60	1.31591	51.7	68	16.5	8000	7–14	99	0		Moderate		12		https://www.icevirtuallibrary.com/journal/jmuen	No	1873	152	No	Covers civil engineering and infrastructure issues relevant to local governments and municipalities, including public works, policy, and management.	0.153	0.231	0.132	1	0.378	1	0	0	0	0.862	0
404	Current Psychology	1046-1310	1936-4735	Business & Management (General)	Psychology	Springer		Q1	2.6	4.6	0.661	54	2.8	1 category: Psychology	44	Monthly	2500	61.5	68	1.3171	80	73.3	26.3	8000	14–28	29	0	3390	Moderate	Hybrid	12		https://link.springer.com/journal/12144	No	1981	44	No	Publishes empirical and theoretical research across all areas of psychology, with an emphasis on research with broad significance.	0	0.312	0.098	1	0	1	0	0	0	0.997	1
24	Journal of Defense Analytics and Logistics	2752-7226	2752-7234	Business & Management (General)		Emrald		Q4		1.8	0.18	4		1 category: Defense	9	Quarterly	200	42.9	55	1.32111	59.6	65.4	14.9	8000	7–14	111	0	4540	Moderate	Diamond OA	0		https://www.emeraldgrouppublishing.com/journal/jdal	No	2016	9	No	Focuses on research using analytics, modeling, and logistics optimization in defense and security systems.	0.041	0.034	0.011	0.5	0	1	0	0	0	0.671	0.986
785	Business Analyst Journal	2049-3665		Business & Management (General)		Emrald								1 category: Analyst	57	Quarterly	150	38.7	60	1.34195	68.1	72	25.6	8000	7–14	127	0		Moderate	Diamond OA	0		https://www.iiba.org/business-analyst-journal/	No	1968	57	No	Focuses on research and practice related to business analysis, requirements engineering, and solution design.	0.101	0.127	0.036	1	0.457	1	1	0	0	0.826	0
438	Performance Measurement and Metrics	1530-6270	1758-5728	Strategy & International Business	Arts and Humanities	Emrald	C	Q1	1.9	2.4	0.312	23	1.09	1 category: Metrics	25	Quarterly	200	41.8	60	1.34723	67.9	68	20.1	8000	7–14	102	0	2500	Moderate	Hybrid	12		https://www.emeraldgrouppublishing.com/journal/pmm	No	2000	25	No	Focuses on research on the theory and practice of performance measurement and metrics in organizations.	0.056	0	0.024	0	0	1	0	0	0	0.856	0
350	Journal of Criminal Psychology	2009-3829	2009-3837	Strategy & International Business	Social Sciences	Emrald		Q2	1.6	1.7	0.34	14	1.65	1 category: Criminal Psych	14	Quarterly	300	45.9	62	1.34843	78.4	65.8	15.2	8000	10–21	27	0	4080	Moderate	Hybrid	0		https://www.emeraldgrouppublishing.com/journal/jcp	No	2011	14	No	Focuses on research on the psychological aspects of criminal behavior, offenders, and the criminal justice system.	0	0	0	0.5	0	1	0	0	0	0	0
622	SN Business & Economics	2730-6308		Business & Management (General)		Springer								2 categories: Business + Economics	4	Quarterly	500	50	65	1.35826	76.6	72	23.7	9000	10–21	22	0		Moderate		0		https://link.springer.com/journal/43546	No	2021	4	No	An open-access journal covering all areas of business, economics, and management.	0.112	0.113	0.033	1	0	1	0	0	0	0.909	0
787	Middle Grades Research Journal	2374-456X	2374-4578	Marketing		Emrald								1 category: Middle Grades	18	Quarterly	180	40	55	1.36061	70.6	65	11.9	8000	7–14	0	0		Moderate		0		https://www.infoagepub.com/mgrj.html	No	2007	18	No	Publishes research on students, learning, and educational practices in the middle grades (ages 10-15).	0.567	0	0	0	0	1	0	0	0	0.991	1
436	Learning and teaching in higher education: Gulf perspectives	1815-3783		Economics	Social Sciences	Emrald		Q2	1.4	1.1	0.199	10	1.92	2 categories: Higher Ed + Regional	10	Quarterly	180	40	62	1.36155	53	46.9	13.4	8000	10–21	341	0		Moderate		12		https://www.emeraldgrouppublishing.com/journal/lthe	No	2015	10	No	Dedicated to research on pedagogy, curriculum, and educational policy in higher education within the Gulf region.	0	0	0	0	0	1	1	0	0	0	0
748	Journal of Social Impact in Business Research	2752-7404	2752-7412	Business & Management (General)		Emrald								2 categories: Social + Business	2	Quarterly	180	40	62	1.36155	80.9	73	20.1	8000	10–21	0	0	1250	Moderate	Gold OA	0		https://www.emeraldgrouppublishing.com/journal/jsibr	No	2023	2	No	Publishes research that addresses the societal relevance and social impact of business practices and management decisions.	0.526	0	0	0	0	1	1	0	0	0.988	0
713	International Journal of Digital Sovereignty and Global Data Governance	2773-0435	2773-0443	Business & Management (General)		Emrald								2 categories: Digital + Governance	1	Quarterly	200	40	60	1.3889	50	68.7	18.9	8000	7–14	0	0	3380	Moderate		0		https://www.emeraldgrouppublishing.com/journal/ijdsgdg	No	2024	1	No	Focuses on research on digital sovereignty, data governance, and policy in the global context.	0.284	0.236	0.101	1	0.611	1	0	1	0	0.988	0.953
686	Annals in Social Responsibility	2772-5955		Business & Management (General)		Emrald								1 category: Responsibility	10	Quarterly	200	40	65	1.38959	45.7	49.4	21.4	8000	10–21	0	0	3200	Moderate	Hybrid	12		https://www.emeraldgrouppublishing.com/journal/asr	No	2015	10	No	Publishes research on corporate social responsibility (CSR), business ethics, and societal impact.	0.157	0.113	0.041	1	0	1	1	0	0	0.865	0
44	Journal of Innovation and Entrepreneurship	2192-5353	2192-5361	Tourism & Hospitality		Springer		Q1	4.2	5.9	0.55	42		1 category: Innovation	13	Quarterly	600	50	58	1.39713	61.9	68.9	28.5	8000	7–14	38	0	1790	Moderate	Gold OA	0		https://link.springer.com/journal/13731	Yes	2012	13	No	Publishes research on the processes of innovation, entrepreneurship, and new venture creation, often with a focus on practical applications and case studies.	0	0	0	0	0.885	1	1	0	0	0	0
777	Infrastructure Asset Management	2056-1164	2056-1172	Business & Management (General)		Emrald		Q3	1.5		0.73	7		1 category: Infrastructure	7	Quarterly	250	42	62	1.39943	50	70.4	20.1	8000	10–21	124	0	2200	Moderate	Hybrid	0		https://www.icevirtuallibrary.com/journal/jinam	No	2018	7	No	Focuses on research on the management, maintenance, and finance of public and private infrastructure assets.	0.168	0.166	0.036	1	0.323	1	1	0	0	0.938	0
914	Quality Education for All	2772-7907		Sustainability & Environmental Management		Emrald		Q4		1	0.1			1 category: Quality	2	Quarterly	180	37.4		1.4118	57.1	50.6	14.8	8000		71	0	1320	Lengthy	Gold OA	0		#N/A	No	2023	2	No	Focuses on research and policy related to achieving high-quality, equitable education for all learners.	0.172	0	0	0	0	1	0	0	0	0	0
479	Safer Communities	1757-8043	1757-8051	Engineering & Technology	Social Sciences	Emrald		Q3	7	1.1	0.204	14	0.81	1 category: Communities	23	Quarterly	200	38.9	60	1.41436	63.1	65.8	14.7	8000	7–14	59	0	3880	Moderate		12		https://www.emeraldgrouppublishing.com/journal/sc	No	2002	23	No	Publishes research on community safety, crime prevention, and security management in various settings, including policy and practice-based studies.	0.175	0.286	0.194	1	0	1	0	0	0	0.976	0
788	The SoJo Journal: Social and Cultural Foundations of Education	2374-4543	2374-4551	Education Management		Emrald								1 category: Social Justice	11	Quarterly	150	35	58	1.42266	70.1	64.3	10.6	8000	7–14	0	0	1500	Moderate		0		https://www.infoagepub.com/sojo.html	Yes	2014	11	No	Focuses on research that examines the social and cultural context and foundations of education and learning.	0.328	0.531	0.432	1	0.256	0.857	0	0	0	0.903	0.743
747	Journal of Responsible Tourism Management	2772-6803	2772-6811	Business & Management (General)		Emrald								Specialized	2	Quarterly	150	35	60	1.42295	79.1	51.7	11.8	10000	7–14	0	0	3710	Moderate	Diamond OA	0		https://www.emeraldgrouppublishing.com/journal/jrtm	No	2023	2	No	Focuses on research on responsible tourism, sustainability, ethics, and community involvement in tourism management.	0.097	0.094	0.03	1	0	1	1	0	0	0.871	0
440	Reference Services Review	0090-7324	1758-4729	Marketing	Social Sciences	Emrald		Q1	1	2.4	0.547	41	1.34	1 category: Reference	52	Quarterly	250	40.7	58	1.43023	84.1	64.7	18.3	8000	7–14	38	0	3500	Moderate	Hybrid	12		https://www.emeraldgrouppublishing.com/journal/rsr	Yes	1973	52	No	Focuses on research and practice related to reference services, user assistance, and information literacy in libraries.	0.093	0.055	0.017	0.75	0	1	1	0	0	0.909	0
818	Global smart food systems	2667-0091		Business & Management (General)		Emrald								Specialized	2	Quarterly	250	40		1.43876	52.8	70.1	26.5	8000		0	0				0		https://www.sciencedirect.com/journal/global-smart-food-systems	No	2023	2	No	Dedicated to research on smart, sustainable, and technology-driven food systems globally.	0.086	0	0.07	0	0	1	0	0	0	0.788	0
927	Journal of Participation and Employee Ownership	2752-7366	2752-7374	Economics		Emrald		Q2		1.7	0.17			1 category: Ownership	7	Quarterly	180	36.1		1.44112	53.7	69.1	28.1	8000		69	0	2500	Moderate	Hybrid	12		#N/A	No	2018	7	No	Dedicated to research on employee participation, organizational democracy, and employee ownership models.	0.09	0	0	0	0	1	1	0	0	0.847	0
765	Southeast Asia: A Multidisciplinary Journal	2753-524X	2753-5258	Information Systems & Digital Business		Emrald								Multi Category	55	Quarterly	200	37.7	60	1.44214	59.8	49.4	14.7	8000	7–14	106	0		Moderate	Diamond OA	0		https://www.emeraldgrouppublishing.com/journal/samj	Yes	1970	55	No	An interdisciplinary journal focusing on various aspects of society, culture, economics, and politics in Southeast Asia.	0.22	0.163	0.174	1	0.895	1	1	0	0	0.947	0
768	Soldering & Surface Mount Technology	0954-0911	1758-7518	Education Management		Emrald			1.8			28		1 category: Soldering	36	Quarterly	300	42.1	60	1.44286	70.6	49.9	10.8	8000	7–14	15	0	2500	Moderate	Hybrid	0		https://www.emeraldgrouppublishing.com/journal/ssmt	No	1989	36	No	Publishes research on soldering, surface mount technology (SMT), and electronic packaging.	0	0	0	1	0.068	1	0	0	0	0	0
852	Journal of Open Innovation: Technology, Market, and Complexity	2199-8531	2199-8531	Economics		Elsevier		Q1	5	9.5		64		0	10	Quarterly	800	50		1.45154	79.9	74.8	36.8	8000		2	5	2070		Gold OA	12		https://www.sciencedirect.com/journal/journal-of-open-innovation-technology-market-and-complexity	No	2015	10	No	Dedicated to research on open innovation models, technology commercialization, and complexity science in innovation.	0	0	0	0	0	1	1	0	0	0.859	0
678	Parikalpana: Journal of Sustainability, Business and Social Innovation	0974-2727	2394-8112	Business & Management (General)		Emrald								0	2	Quarterly	180	35		1.46593	48.2	46.9	12.7	10000		0	0			Diamond OA	0		https://parikalpana.kiit.ac.in	No	2023	2	No	Focuses on research on sustainability, business management, and social innovation.	0.239	0.197	0.057	1	0.22	1	1	0	0	0.994	1
373	Conflict Resolution Quarterly	1541-1502	1541-1510	Marketing	Social Sciences	Wiley	B	Q2	1.1	1.4	0.352	25	0.6	2 categories: Conflict + Law	52	Quarterly	250	39	60	1.47152	49.9	66.4	14.6	8000	7–14	69	0	2900	Moderate	Hybrid	0		https://onlinelibrary.wiley.com/journal/15411508	No	1973	52	No	Publishes research and practice-focused articles on conflict resolution, mediation, and negotiation in various settings.	0.459	0.262	0.084	1	0.312	1	0	1	0	0.971	1
516	International Journal of Pharmaceutical and Healthcare Marketing	1750-6131	1750-6131	Business & Management (General)	Business, Management and Accounting	Emrald	C	Q3	1.1	2.8	0.46	28	1.97	2 categories: Pharma + Marketing	18	Quarterly	350	42.5	65	1.47235	47.9	68.7	14.3	10000	10–21	91	0	3750	Moderate	Hybrid	12		https://www.emeraldgrouppublishing.com/journal/ijphm	No	2007	18	No	Focuses on research on marketing strategies, consumer behavior, and management in the pharmaceutical and healthcare sectors.	0	0	0	0	0	1	1	0	0	0	0
357	Information Discovery and Delivery	2398-6240	2398-6259	Business & Management (General)	Computer Science	Emrald	C	Q2	2.6	4.4	0.538	20	3.25	1 category: Discovery	8	Quarterly	250	38.6	55	1.48043	64.7	68.7	16.4	8000	7–14	95	0	4320	Moderate	Hybrid	0		https://www.emeraldgrouppublishing.com/journal/idd	No	2017	8	No	Publishes research on information retrieval, discovery tools, and the delivery of information services in digital environments.	0.045	0.113	0.043	0.75	0	1	0	0	0	0.856	0.926
85	Management Teaching Review	2632-487X	2632-4888	Business & Management (General)		Sage	C	Q2		4.1	0.45	10		2 categories: Management + Education	10	Quarterly	300	40	55	1.49445	62.2	62.8	11.2	8000	7–14	31	31	4620	Moderate	Hybrid	12		https://journals.sagepub.com/home/mtr	No	2015	10	No	Dedicated to improving management education through articles on innovative teaching methods, pedagogical research, and course design across all management disciplines.	0.134	0.18	0.253	1	0	1	1	0	0	0.915	0.723
496	Support for Learning	0268-2141	1467-9671	Business & Management (General)	Social Sciences	Wiley		Q3	1.1	1.4	0.298	34	0.75	1 category: Learning Support	39	Quarterly	250	38	55	1.4949	67.6	64.3	11.7	8000	7–14	44	0		Moderate		12		https://nasenjournals.onlinelibrary.wiley.com/journal/14679604	No	1986	39	No	Focuses on research and practice related to special educational needs, inclusive education, and student support.	0	0	0	0	0	1	1	0	0	0	0
230	Future Cities	2772-6854	2772-6862	Business & Management (General)		Emrald						12		Multi Category		Quarterly	300	40	62	1.49549	72.8	65.3	17.3	8000	10–21	0	0		Moderate		12		https://www.emeraldgrouppublishing.com/journal/fc	Yes			No	Focuses on research on smart cities, sustainable urban development, and the future of urban living.	0	0	0	0	0	1	0	0	0	0	0
664	Journal of Legal Studies Education	0896-5811	1552-6781	Business & Management (General)		Wiley								2 categories: Law + Education	43	Quarterly	200	35	62	1.50494	79	70.1	20.9	8000	10–21	0	0	3520	Moderate	Hybrid	0		https://onlinelibrary.wiley.com/journal/17442714	No	1982	43	No	Focuses on research related to the teaching, curriculum, and pedagogy of legal studies and business law in higher education.	0.045	0.048	0.02	0.75	0.596	1	0	0	0	0.756	0
704	Fintech and Digital Accounting Review	2772-5076		Business & Management (General)		Emrald								2 categories: Fintech + Accounting	2	Quarterly	200	35	62	1.50494	47.5	48.8	17.5	8000	10–21	0	0		Moderate	Diamond OA	0		https://www.emeraldgrouppublishing.com/journal/fdar	No	2023	2	No	Focuses on research on FinTech, digital technologies, and their impact on accounting and financial reporting.	0.123	0.137	0.041	1	0.321	1	1	0	0	0.994	0
655	Leader to Leader	1087-3286	1531-5355	Business & Management (General)		Wiley								1 category: Leadership	29	Quarterly	200	35	62	1.50494	78.4	74.1	30.1	8000	10–21	0	0		Moderate		12		https://onlinelibrary.wiley.com/journal/15315455	No	1996	29	No	A practical publication focusing on leadership, management, and organizational innovation for executives and change agents in various sectors.	0.25	0.262	0.139	1	0	0	1	0	0	0.991	0
333	Journal of Corporate Real Estate	1463-6050	1758-2982	HRM & Organizational Behavior	Economics, Econometrics and Finance	Emrald	C	Q2	1	3.8	0.609	32	3.29	1 category: Real Estate	26	Quarterly	200	34.9	62	1.50726	56.7	67.6	17.1	10000	10–21	50	0	4480	Moderate	Hybrid	12		https://www.emeraldgrouppublishing.com/journal/jcre	No	1999	26	No	Aims to advance research into the strategic management of corporate real estate (CRE), facilities management, and their contribution to business strategy.	0	0	0	0	0.592	1	0	0	0	0.938	0
515	International Journal of Emergency Services	2047-0870	2047-0889	Business & Management (General)	Social Sciences	Emrald	C	Q2	1.6	1.7	0.236	14	0.98	1 category: Emergency	12	Quarterly	250	37.5	62	1.508	64.6	66.4	16.8	8000	10–21	87	0	2500	Moderate	Hybrid	0		https://www.emeraldgrouppublishing.com/journal/ijes	No	2013	12	No	Publishes research on the management, policy, and operations of emergency services (e.g., fire, ambulance, police).	0	0	0	0	0	1	1	0	0	0.929	0
471	Rapid Prototyping Journal	1355-2546	1758-5523	Engineering & Technology	Engineering	Emrald		Q2	3.6	7.3	0.715	108	4.64	1 category: Prototyping	30	Quarterly	600	46	65	1.50995	46	73	23.9	8000	10–21	70	0		Moderate		0		https://www.emeraldgrouppublishing.com/journal/rpj	No	1995	30	No	Dedicated to research on additive manufacturing, 3D printing, rapid prototyping, and tool making technologies.	0	0	0	0.75	0.344	1	1	0	0	0	0.986
742	Journal of Management History	1758-1323	1758-1331	Public Administration & Policy	Arts and Humanities	Emrald	B	Q1	1.7	2.3	0.395	25	1.53	1 category: History	19	Quarterly	200	34.4	60	1.51853	85	66.4	14.8	8000	7–14	46	0	3200	Moderate	Hybrid	12		https://www.emeraldgrouppublishing.com/journal/jmh	No	2006	19	No	Dedicated to historical research in management and organizational theory, examining the evolution of management thought and practice.	0.063	0.067	0.021	0.75	0	0.976	0	0	0	0.979	0
396	On the Horizon: The International Journal of Learning Futures	1074-8121	1754-8558	Marketing		Emrald			1.4			25		2 categories: Learning + Future	32	Quarterly	250	36.8	55	1.52383	67.9	69.3	12.6	8000	7–14	64	0	3630	Moderate	Hybrid	12		https://www.emeraldgrouppublishing.com/journal/oth	No	1993	32	No	Focuses on strategic forecasting, future trends, and innovative practices in education, learning, and organizational change.	0	0	0	0	0	1	0	0	0	0.885	0
478	Journal of Forensic Practice	1463-6681	2040-5242	Business & Management (General)	Social Sciences	Emrald		Q2	4	0.8	0.2	21	0.94	1 category: Forensic	14	Quarterly	250	36.8	62	1.52489	80.5	67.6	19.4	8000	10–21	46	0	3990	Moderate	Hybrid	0		https://www.emeraldgrouppublishing.com/journal/jfp	No	2011	14	No	Focuses on research and practice related to forensic psychology, forensic psychiatry, and criminal justice, including offender assessment and treatment.	0.123	0	0	0	0.37	1	0	0	0	0.832	0
759	Organizational Cybersecurity Journal: Practice, Process & People	2572-1082	2572-1090	Education Management		Emrald								0	3	Quarterly	200	33.3		1.53479	59.8	72.3	21.8	8000		124	0	3920		Diamond OA	0		https://www.emeraldgrouppublishing.com/journal/ocj	No	2022	3	No	Focuses on the human, organizational, and process aspects of cybersecurity and information assurance.	0.157	0.204	0.082	1	0	1	1	0	0	0.95	0.851
784	Waste and Resource Management	1746-4786	1746-4794	Business & Management (General)		Emrald		Q2	8	3.1		18		1 category: Waste	15	Quarterly	250	36	65	1.54466	46.8	67.6	17.8	8000	10–21	88	0		Moderate		0		https://www.icevirtuallibrary.com/journal/jwarm	No	2010	15	No	Focuses on the management and policy aspects of waste, resource efficiency, and the circular economy, covering collection, treatment, and regulation.	0.086	0.178	0.043	0.75	0	1	0	0	0	0.679	0
711	IIMBG Journal of Sustainable Business and Innovation	2515-582X	2515-5838	Business & Management (General)		Emrald								2 categories: Sustainability + Business	2	Quarterly	150	29.4	65	1.54631	59.3	74.4	30.8	8000	10–21	82	0	2840	Moderate	Diamond OA	0		https://www.emeraldgrouppublishing.com/journal/iimbgsbi	No	2023	2	No	Publishes research on sustainable business practices, innovation, and corporate social responsibility (IIM Bodh Gaya).	0.041	0.029	0.015	1	0	1	0	0	0	0.888	0
397	Therapeutic Communities	0964-1876	1758-7577	Economics	Health Professions	Emrald		Q4		0.5	0.191	18	0.19	1 category: Therapy	50	Quarterly	180	31.8	60	1.54732	76	66.4	11.3	10000	7–14	312	0	2500	Moderate	Hybrid	12		https://www.emeraldgrouppublishing.com/journal/tc	No	1975	50	No	Focuses on research and practice related to therapeutic communities (TCs) and other democratic organizational settings in mental health and addiction.	0.063	0.036	0.011	0.75	0	1	1	0	0	0.741	0
769	Social Studies Research and Practice	1933-5415	1933-5423	Marketing		Emrald								2 categories: Social + Education	19	Quarterly	180	31.7	55	1.54882	83.7	69.1	18.2	8000	7–14	43	0		Moderate	Diamond OA	0		https://www.emeraldgrouppublishing.com/journal/ssrp	No	2006	19	No	Focuses on research related to teaching, curriculum, and practice in social studies education.	0.049	0	0	0.5	0	1	0	0	0	0.918	0
677	Journal of Philanthropy	1465-4520	3064-7878	Business & Management (General)		Wiley			1.4					1 category: Philanthropy	1	Quarterly	200	33	62	1.55125	62.9	68.7	18.9	8000	10–21	7	0		Moderate				https://onlinelibrary.wiley.com/journal/26946532	No	2024	1	No	Focuses on research on philanthropy, non-profit organizations, and charitable giving, covering social, economic, and ethical aspects.	0.347	0	0	0	0.216	1	1	0	0	0	0
689	Corporate Communications: An International Journal	1356-3289	1758-5744	Information Systems & Digital Business		Emrald		Q1	3.3		1.01			1 category: Communications	29	Quarterly	500	42.9	68	1.55159	54.6	71.6	29.3	8000	14–28	64	0	2500	Moderate	Hybrid	12		https://www.emeraldgrouppublishing.com/journal/ccij	No	1996	29	No	Focuses on research on corporate communication, public relations, and organizational discourse.	0.25	0.3	0.11	1	0.137	1	0	1	0	0.979	0.953
892	Journal of Transnational Management	1547-0639	1547-0647	Business & Management (General)		T&F	C	Q4		1.9	0.2	16		1 category: Transnational	30	Quarterly	250	35		1.55866	52	78	31.7	8000		0	0	3200		Hybrid	12	Seal	https://www.tandfonline.com/journals/wtnm20	Yes	1995	30	No	Publishes research on the management and strategy of organizations operating across national borders, focusing on global coordination and integration.	0.116	0.101	0.044	1	0	1	1	0	0	0.874	0
343	Business and Professional Communication Quarterly	2329-4915	2329-4923	Business & Management (General)	Arts and Humanities	Sage	C	Q1	2.1	2.2	0.477	39	1.24	2 categories: Business + Communication	90	Quarterly	400	40.4	62	1.56044	67.8	64.7	17.4	8000	10–21	30	30	3200	Moderate	Hybrid	12		https://journals.sagepub.com/home/bcq	No	1935	90	No	Publishes research on communication in business and professional settings, covering written, oral, and digital forms.	0.09	0.046	0.009	0.75	0.645	1	1	0	0	0.915	0
224	Drugs, Habits and Social Policy	2752-6785		Business & Management (General)		Emrald			1.6			15		0	8	Quarterly	250	34.8		1.56346	50.5	68	11.6	8000		69	0	2500	Moderate	Hybrid	12		https://www.emeraldgrouppublishing.com/journal/dhs	No	2017	8	No	Focuses on research on drug policy, social policy, and the societal issues related to substance abuse and habits.	0	0	0	0.75	0	1	0	0	0	0.971	0
749	Journal of Transport and Sustainability	2772-6803	2772-6811	Marketing		Emrald								2 categories: Transport + Sustainability	3	Quarterly	250	35	65	1.56879	48.5	70.4	18.7	8000	10–21	0	0	3000	Moderate	Gold OA	12		https://www.emeraldgrouppublishing.com/journal/jts	No	2022	3	No	Dedicated to research on the intersection of transportation systems and sustainability goals, covering policy and technology.	0.164	0.161	0.184	1	0.286	1	1	0	0	0.968	0.953
521	Geotechnical Research	2046-6404	2046-6412	Business & Management (General)	Earth and Planetary Sciences	Emrald		Q2	1.8	3.9	0.468	17	1.62	1 category: Geotechnical	11	Quarterly	250	35	65	1.56879	63.1	69.1	20.8	10000	10–21	95	0	2200	Moderate	Hybrid	0		https://www.emeraldgrouppublishing.com/journal/jgeot	No	2014	11	No	Publishes research on geotechnical engineering, soil mechanics, and engineering geology.	0.041	0.096	0.029	0.75	0	1	1	0	0	0.95	0
154	Teaching and Learning in Nursing	1557-3081	1878-5229	Business & Management (General)	Nursing	Elsevier		Q2	1.7	2.5	0.486	26	1.8	1 category: Nursing Education	19	Quarterly	400	40	58	1.57029	69.8	62.6	12.8	8000	7–14	3	0	2900	Moderate	Hybrid	12		https://www.sciencedirect.com/journal/teaching-and-learning-in-nursing	No	2006	19	No	Focuses on research and best practices for teaching and learning in nursing education.	0.284	0.411	0.242	1	0.498	0.905	1	0	0	0.938	0.628
338	Human Resource Management International Digest	0967-0734	1758-6287	HRM & Organizational Behavior		Emrald	C	Q4		1.4	0.15	21		1 category: HRM	32	Quarterly	250	34.8	52	1.57159	82.3	68.3	14.7	8000	5–10	12	0	3300	Easy	Hybrid	12		https://www.emeraldgrouppublishing.com/journal/hrmid	No	1993	32	No	Publishes summaries and digests of key research and articles in Human Resource Management (HRM).	0.063	0.05	0.012	1	0	1	0	0	0	0.703	0
334	Library Hi Tech News	0741-9058	1758-6236	Engineering & Technology		Emrald		Q1		1.1	0.12	23		2 categories: Library + Tech	41	Quarterly	150	28.1	55	1.57321	73.3	65.3	12.8	8000	7–14	15	0	2500	Easy	Hybrid	12		https://www.emeraldgrouppublishing.com/journal/lhtn	No	1984	41	No	Provides updates, news, and short articles on new technologies and trends in library and information science.	0.187	0.3	0.171	1	0	1	1	0	0	0.985	0.973
358	Place Branding and Public Diplomacy	1751-8059	1751-8059	Business & Management (General)	Business, Management and Accounting	Springer	B	Q2	1.9	3.1	0.467	31	1.52	Multi Category	20	Quarterly	200	32	60	1.57409	58.9	70.1	20.6	8000	7–14	8	0	3360	Moderate	Hybrid	0		https://www.palgrave.com/gp/journal/41254	No	2005	20	No	Focuses on research on branding, marketing, and communication strategies for places (cities, regions, nations).	0.142	0.089	0.046	0.75	0.603	1	0	0	0	0.976	0
679	SAM Advanced Management Journal	0036-0808	2378-5670	Accounting & Finance		Emrald								1 category: Management	89	Quarterly	250	34.3	60	1.5849	78.4	48.3	12.7	8000	7–14	49	0	3350	Moderate	Diamond OA	0		https://samnational.org/sam-advanced-management-journal/	No	1936	89	No	A practice-oriented journal focusing on advanced management principles and strategic decision-making.	0.03	0.084	0.03	0.75	0	1	1	0	0	0.856	0
472	Social Enterprise Journal	1750-8614	1750-8622	Engineering & Technology	Economics, Econometrics and Finance	Emrald	C	Q1	3.5	4	0.616	14	2.75	1 category: Social Enterprise	20	Quarterly	200	31.3	60	1.59029	67.5	69.4	27.3	8000	7–14	59	0		Moderate		12		https://www.emeraldgrouppublishing.com/journal/sej	No	2005	20	No	Dedicated to research on social enterprise, social entrepreneurship, and non-profit organizations.	0.231	0	0	0	0	1	0	0	0	0.871	0
709	History of Education Review	0819-8543	2446-0691	Business & Management (General)	Arts and Humanities	Emrald		Q1	5	0.6	0.293	8	0.33	1 category: History	53	Quarterly	180	29.1	62	1.6089	66.7	68	12.7	8000	10–21	47	0	3400	Moderate	Hybrid	24		https://www.emeraldgrouppublishing.com/journal/her	No	1972	53	No	Focuses on historical research and scholarship related to education in Australia, New Zealand, and internationally.	0.112	0	0	0	0	1	0	0	0	0.841	0
740	Journal of Knowledge, Risk and Sustainable Management	2752-7323	2752-7331	Operations & Supply Chain		Emrald								0	4	Quarterly	300	35		1.61013	60.9	70.1	21.4	8000		0	0	2950	Easy	Hybrid	0		https://www.emeraldgrouppublishing.com/journal/jkrsm	No	2021	4	No	Focuses on research on knowledge management, risk management, and sustainable practices in organizations.	0	0	0	0	0	1	0	0	0	0.947	0
800	Artificial Intelligence for a Sustainable Built Environment	2772-5068		Business & Management (General)		Emrald								2 categories: AI + Built	1	Quarterly	200	30		1.61072	54.9	70.1	13.9	8000		0	0	3340		Hybrid	12		https://www.sciencedirect.com/journal/artificial-intelligence-for-a-sustainable-built-environment	No	2024	1	No	Focuses on research on the application of AI and machine learning to improve the sustainability of the built environment.	0.071	0.065	0.025	1	0	1	0	0	0	0.953	0
934	DIGITAL HEALTH	2055-2078		Business & Management (General)	Computer Science	Sage		Q2	3.5	3.7	0.989	21	3.74	2 categories: Digital + Health	10	Quarterly	500	40		1.61938	58.1	69.4	12.1	No limit		0	0	2930	Easy	Gold OA	0		https://journals.sagepub.com/home/dhj	No	2015	10	No	Interdisciplinary journal publishing research that uses digital tools, technologies, and data science to advance human health and healthcare, emphasizing ethical and equitable delivery.	0.056	0.07	0.028	1	0	0.976	0	0	0	0.862	0.912
145	International Journal of Gastronomy and Food Science	1878-4518	1878-4518	Tourism & Hospitality	Social Sciences	Elsevier		Q1	3.6	4.5	0.617	28	4.54	Specialized	11	Quarterly	300	35	60	1.61979	80.3	69.6	17.3	10000	7–14	4	4		Moderate		0		https://www.sciencedirect.com/journal/international-journal-of-gastronomy-and-food-science	No	2014	11	No	Focuses on the science, innovation, and management within gastronomy and food science, linking culinary arts with scientific principles.	0	0	0	0.5	0.444	1	0	0	0	0.871	0.703
786	Journal of Character Education	1542-6580		Business & Management (General)		Emrald								1 category: Character	23	Quarterly	200	30	58	1.62006	75.7	65.8	13.5	8000	7–14	0	0		Moderate		12		https://www.infoagepub.com/jce.html	No	2002	23	No	Dedicated to research and practice related to the promotion of good character and ethical development in education.	0	0	0	0	0	1	0	0	0	0.985	0
139	ABAC Journal	1906-8234	2286-9714	Accounting & Finance		Emrald		Q1		2	0.19	9		1 category: Management	44	Quarterly	300	35	65	1.62059	48.7	36.7	9.4	8000	10–21	0	0		Lengthy	Diamond OA	0		https://www.journal.abac.edu	No	1981	44	No	A journal from Assumption University in Thailand, publishing research on business administration and management.	0	0.046	0.01	0.75	0	1	1	0	0	0.806	0.784
573	Transfer: European Review of Labour and Research	1024-258X	1609-1701	Economics		Sage	C	Q1	3.7		0.95			1 category: Labour	30	Quarterly	300	35	65	1.62059	65	70.1	14.7	8000	10–21	0	29		Moderate		12		https://journals.sagepub.com/home/trs	No	1995	30	No	Focuses on labour research and policy in Europe, covering employment, social policy, industrial relations, and working life.	0	0	0	0	0.553	1	1	0	0	0.838	0
544	Human Systems Management	1875-8703	1875-8799	Healthcare Management	Business, Management and Accounting	Sage	C	Q3		3.2	0.371	30	2.22	1 category: Systems	45	Quarterly	300	35	65	1.62059	78.8	68	32.6	8000	10–21	0	0	1500	Moderate	Hybrid	12		https://content.iospress.com/journals/human-systems-management	No	1980	45	No	Addresses the management of complex human and technical systems, focusing on methods like soft systems methodology, cybernetics, and organizational learning.	0.015	0.043	0.033	0.75	0.506	1	1	0	0	0	0
423	International Review on Public and Nonprofit Marketing	1865-1970	1865-1989	Marketing	Economics, Econometrics and Finance	Springer	B	Q2	2.1	3	0.366	22	2.29	2 categories: Nonprofit + Marketing	21	Quarterly	200	30	65	1.62119	50.8	68	17.1	8000	10–21	7	0	3800	Moderate	Hybrid	12		https://link.springer.com/journal/12208	No	2004	21	No	Publishes research on marketing concepts and applications in the public sector and nonprofit organizations.	0	0	0	0	0	1	1	0	0	0	0
634	International Insolvency Review	1099-1131	1099-1182	Healthcare Management	Social Sciences	Wiley	B	Q3	0.3	0.7	0.17	8	0.26	1 category: Insolvency	40	Quarterly	200	30	68	1.62167	78.2	70.4	27.3	8000	14–28	0	0	2900	Moderate	Hybrid	24		https://onlinelibrary.wiley.com/journal/10991107	No	1985	40	No	Dedicated to research and analysis on cross-border insolvency and business restructuring law and practice.	0.049	0.077	0.036	1	0	1	0	0	0	0.829	0.851
172	Compensation & Benefits Review	0886-3687	1552-6684	Business & Management (General)		Sage		Q4		1.3		17		1 category: Compensation	56	Quarterly	250	32.5	60	1.62832	52.1	63.3	10.8	8000	7–14	43	21	3520	Moderate	Hybrid	12		https://journals.sagepub.com/home/cbr	No	1969	56	No	Addresses compensation and benefits practices, trends, strategies, and challenges faced by HR and compensation professionals in attracting, motivating, and retaining talent.	0	0	0	0.25	0	1	1	0	0	0.868	0.743
84	International Journal of Housing Markets and Analysis	1750-5631	1750-564X	Business & Management (General)	Economics, Econometrics and Finance	Emrald	B	Q2	2	2.5	0.42	24	2.03	Specialized	17	Quarterly	400	37.8	62	1.62852	52.6	65.6	17.8	8000	10–21	20	0	3700	Moderate		0		https://www.emeraldgrouppublishing.com/journal/ijhma	No	2008	17	No	Publishes research on housing markets, finance, policy, and demand/supply analysis.	0.06	0.075	0.037	0.75	0	0.952	0	1	0	0.959	0
607	Journal of Global Entrepreneurship Research	2251-7319	2251-7327	Healthcare Management		Springer		Q2	1.4		0.82			1 category: Entrepreneurship	12	Quarterly	500	40	62	1.62942	79.2	48.3	20.4	8000	10–21	9	0	1490	Moderate	Gold OA	0		https://link.springer.com/journal/40404	No	2013	12	No	An open-access journal focusing on research on entrepreneurship and small business in a global context.	0.071	0.067	0.02	0.75	0	1	1	0	0	0.768	0
760	Policing: An International Journal	1363-9515	1758-6449	Accounting & Finance		Emrald		Q2	1.7		0.84			2 categories: Policing + Law	18	Quarterly	500	39.9	70	1.63344	67.1	70.4	21.8	8000	14–30	59	0	3620	Moderate	Hybrid	0		https://www.emeraldgrouppublishing.com/journal/pijpsm	No	2007	18	No	Publishes research on the management, policy, and practice of policing and law enforcement internationally.	0	0	0	0	0	1	1	0	0	0.988	0
923	World Food Policy	2707-1601	2707-161X	Business & Management (General)		Wiley		Q3			0.28			2 categories: Food + Policy	7	Quarterly	200	29		1.63373	50.3	68.7	13.6	8000		54	0	3000	Moderate	Hybrid	12		#N/A	No	2018	7	No	Publishes articles on food policy and governance at all levels (local, national, global), addressing issues of food security, sustainability, and public health.	0	0	0	0.75	0	1	0	0	0	0.882	0
165	Journal of Organizational Ethnography	2046-6757	2046-6757	Business & Management (General)	Social Sciences	Emrald		Q1	1	1.4	0.273	20	0.78	2 categories: Organization + Ethnography	14	Quarterly	250	32	63	1.64087	57.2	65.4	13.5	8000	10–21	43	0	4400	Moderate	Hybrid	0		https://www.emeraldgrouppublishing.com/journal/joe	No	2011	14	No	Dedicated to research that uses ethnographic methods to study organizations, work, and management.	0.142	0.017	0.008	0.25	0	1	0	0	0	0	0
485	International Journal of Health Governance	2059-4633		Engineering & Technology	Earth and Planetary Sciences	Emrald		Q2	1.9	2.5	0.308	25	1.28	1 category: Governance	9	Quarterly	350	35.5	62	1.6511	46.3	68	22.6	8000	10–21	25	0	3200	Moderate	Hybrid	0		https://www.emeraldgrouppublishing.com/journal/ijhg	No	2016	9	No	Focuses on research on governance, policy, and administration issues in the health sector internationally.	0.082	0.101	0.071	1	0.455	1	0	0	0	0.924	0.98
708	Housing, Care and Support	1460-8790		Business & Management (General)	Social Sciences	Emrald			6	1.8	0.315	12	1.23	0	20	Quarterly	200	28		1.65674	65.6	68	17.5	8000		156	0	2500	Easy	Hybrid	12		https://www.emeraldgrouppublishing.com/journal/hcs	No	2005	20	No	Publishes research and practice-based articles on the provision of housing, care, and support services for vulnerable individuals and communities.	0.146	0.144	0.083	1	0.605	0.952	1	1	0	0.991	0
554	Industry and Higher Education	2043-6858	2043-6858	Business & Management (General)	Business, Management and Accounting	Sage	C	Q2	1.9	3.3	0.497	30	2.32	2 categories: Industry + Education	38	Quarterly	400	36.7	70	1.65863	53.6	67.6	24.9	8000	14–30	96	18	3000	Moderate	Hybrid	12		https://journals.sagepub.com/home/ihe	No	1987	38	No	Focuses on research on the collaboration and relationship between industry and higher education in technology, training, and innovation.	0	0	0	0	1	1	1	0	0	0	0
551	Field Methods	1525-822X	1552-374X	Business & Management (General)	Social Sciences	Sage		Q1	1.4	3	0.559	58	1.83	1 category: Methods	26	Quarterly	300	33.3	68	1.66348	67.7	70.4	28.3	5000	14–28	51	30	3000	Moderate	Hybrid	12		https://journals.sagepub.com/home/fmx	No	1999	26	No	Dedicated to research on the development and application of field methods in anthropology, sociology, and other social sciences.	0.06	0	0	0	0	1	0	0	0	0.903	0
394	Journal of Healthcare Leadership	1179-6644		Strategy & International Business	Nursing	T&F		Q1	3.8	4.2	1.082	16	4.58	2 categories: Health + Leadership	16	Quarterly	350	35	60	1.66357	63.2	65	18.1	8000	7–14	0	0	3650	Moderate	Gold OA	0		https://www.emeraldgrouppublishing.com/journal/jhl	No	2009	16	No	Focuses on leadership, governance, and management within the healthcare sector, including policy and organizational change.	0.067	0.168	0.051	1	0	1	0	0	0	0.968	0
35	Journal of Trade Science	2815-5793	2755-3957	Business & Management (General)		Emrald								1 category: Trade	6	Quarterly	250	31	62	1.66484	57.6	34.8	15.3	8000	10–21	25	0	4150	Moderate	Diamond OA	0		https://www.emeraldgrouppublishing.com/journal/jts	No	2019	6	No	Dedicated to research on the science and theory of trade, trade policy, and international trade models.	0.063	0.077	0.018	0.5	0.41	1	1	0	0	0.603	0
180	Journal of Creating Value	2394-964X	2394-9658	Business & Management (General)		Sage		Q2	1.5			15		1 category: Value Creation	10	Quarterly	200	27.9	64	1.66966	74.7	41.7	13.2	8000	10–21	0	0	2590	Moderate	Hybrid	0		https://journals.sagepub.com/home/jcv	No	2015	10	No	Focuses on research on value creation, business models, and management strategies that lead to customer and organizational value.	0.134	0.185	0.062	1	0.415	1	0	0	0	0.968	0.993
273	VILAKSHAN - XIMB Journal of Management	0974-5173	2455-1646	Education Management		Emrald						15		1 category: Management	23	Quarterly	180	26.1	68	1.67798	87.1	38.7	9.8	8000	14–30	62	0	2900	Moderate	Diamond OA	0		https://www.emeraldgrouppublishing.com/journal/xjm	No	2002	23	No	Publishes research on management, business, and organizational issues (associated with Xavier Institute of Management, Bhubaneswar).	0.067	0.048	0.039	0.75	0.491	1	1	0	0	0.953	0
644	European Financial Management	1350-5939	1468-036X	Entrepreneurship & Innovation	Economics, Econometrics and Finance	Wiley	A	Q1	3.1	3.7	0.988	71	2.95	1 category: Finance	30	Quarterly	600	40	75	1.67939	46.5	70.1	26.8	8000	21–45	39	0	3500	Moderate	Hybrid	0		https://onlinelibrary.wiley.com/journal/1468036X	No	1995	30	No	Publishes high-quality research on financial management and financial economics with a focus on European markets and institutions.	0.108	0	0	1	0	1	1	0	0	0.982	0.966
434	Journal of Facilities Management	1741-0983	1741-0983	Business & Management (General)	Business, Management and Accounting	Emrald	C	Q2	2.7	3.6	0.448	38	2.52	1 category: Facilities	22	Quarterly	400	35.8	65	1.68138	70.6	67.6	21.6	8000	10–21	117	0	2940	Moderate	Hybrid	12		https://www.emeraldgrouppublishing.com/journal/jfm	Yes	2003	22	No	Focuses on research on the management, planning, and strategic role of facilities and built environments.	0.306	0	0	0	0	1	1	0	0	0.935	0
732	Journal of Enabling Technologies	2398-6271	2398-6271	HRM & Organizational Behavior	Business, Management and Accounting	Emrald		Q3	1	2.5	0.338	23	2.46	1 category: Enabling	8	Quarterly	200	27.2	55	1.68436	50.7	52.8	18.6	8000	7–14	59	0	2760	Moderate	Hybrid	12		https://www.emeraldgrouppublishing.com/journal/jet	No	2017	8	No	Focuses on research on assistive technologies, universal design, and technologies that enable participation for people with disabilities.	0.269	0	0	0	0	1	1	0	0	0.9	0
990	Geosynthetics International	1072-6349	1751-7684	Economics	Earth and Planetary Sciences	Emrald		Q1	3.3	7.2	1.319	63	3.94	1 category: Geosynthetics	41	Quarterly	300	32		1.68444	83.7	73.3	26.7	8000		73	0	2200	Moderate	Hybrid	12		https://www.icevirtuallibrary.com/journal/jgein	No	1984	41	No	Publishes research on the use, performance, and design of geosynthetics in civil, geotechnical, and environmental engineering.	0	0	0	0.5	0	1	0	0	0	0.688	0
909	Higher Education Evaluation and Development	2377-6232	2377-6240	HRM & Organizational Behavior		Emrald		Q2			0.3			1 category: Higher Ed	8	Quarterly	200	26.7		1.68665	48.5	73.3	22.6	9000		33	0	3200	Easy	Hybrid	0		#N/A	No	2017	8	No	Focuses on research related to evaluation, quality assurance, and organizational development in higher education.	0.034	0.026	0.014	0.75	0	1	0	0	0	0.8	0
674	Climate and Energy	2405-484X	2405-484X	Sustainability & Environmental Management		Wiley								2 category: Policy & Law	1	Quarterly	250	30	65	1.68947	50.5	72	23.7	8000	10–21	0	0		Moderate		12		https://onlinelibrary.wiley.com/journal/26924664	No	2024	1	No	Focuses on the legal aspects of climate change and energy, including regulatory issues, policy, law and economics related to clean energy transition and greenhouse gas markets.	0.045	0	0	0	0	1	0	0	0	0	0
617	Italian Journal of Marketing	1720-5654	1720-5662	Business & Management (General)		Springer		Q2		3	0.31	14		1 category: Marketing	5	Quarterly	250	30	65	1.68947	54.9	70.1	24.1	8000	10–21	6	0	2690	Moderate	Hybrid	12		https://link.springer.com/journal/43039	No	2020	5	No	Focuses on research on marketing theory, strategy, and practice, often with a focus on Italian and European contexts.	0	0	0	0	0	1	1	0	0	0.694	0
947	Universal Access in the Information Society	1615-5289	1615-5297	Business & Management (General)	Computer Science	Springer	C	Q2	2.7	7.2	0.75	49	3.38	2 categories: Universal + Access	24	Quarterly	400	35		1.69134	61.4	73.7	25.4	8000		9	0	3190	Moderate	Hybrid	0		https://link.springer.com/journal/10209	No	2001	24	No	Focuses on research concerning universal accessibility to information society technologies for all people, regardless of age, disability, or context.	0.075	0.089	0.025	0.5	0.513	1	1	0	0	0.468	0
813	Environmental Sustainability and Resilience	2772-5955		Business & Management (General)		Emrald								1 category: Sustainability	1	Quarterly	400	35		1.69134	63.8	78	37.2	8000		0	0	2500		Hybrid	12		https://www.sciencedirect.com/journal/environmental-sustainability-and-resilience	No	2024	1	No	Focuses on research on environmental sustainability, ecological resilience, and climate change adaptation.	0.216	0.036	0.012	0	0	1	0	0	0	0.544	0
738	Journal of International Education in Business	2046-4703	2046-4703	Business & Management (General)	Business, Management and Accounting	Emrald	C	Q2	2.5	2.3	0.367	17	2.41	2 categories: International + Business	17	Quarterly	200	26.9	60	1.69215	59.9	68.7	12.7	8000	7–14	60	0	2500	Moderate	Hybrid	12		https://www.emeraldgrouppublishing.com/journal/jieb	No	2008	17	No	Focuses on research related to internationalization in business education, covering curriculum and exchange programs.	0	0	0	0	0	1	0	0	0	0.85	0
155	Journal of the International Council for Small Business	2373-1002	2373-1010	Business & Management (General)		T&F		Q3	1.5			12		1 category: Small Business	8	Quarterly	300	32	62	1.69489	82.2	63.9	15.6	8000	10–21	26	46	2950	Moderate	Hybrid	0		https://www.tandfonline.com/journals/icsb20	Yes	2017	8	No	Publishes research on small business, entrepreneurship, and new venture creation with a global perspective.	0.127	0.101	0.03	1	0.536	1	0	1	0	0.991	0.986
136	Studies in Graduate and Postdoctoral Education	2044-3862	2044-3870	Economics	Social Sciences	Emrald		Q2	1.6	2.3	0.46	9	1.95	1 category: Graduate Ed	12	Quarterly	250	29.6	60	1.69828	53.1	64.7	13.8	8000	7–14	80	0	3280	Moderate	Hybrid	0		https://www.emeraldgrouppublishing.com/journal/sgpe	No	2013	12	No	Focuses on research on graduate (Masters/PhD) and postdoctoral education, policy, and career development.	0.149	0.137	0.058	1	0	1	0	0	0	0.829	0
736	Journal of International Cooperation in Education	1349-4383		Entrepreneurship & Innovation		Emrald								2 categories: International + Education	27	Quarterly	250	29.5	60	1.70069	67.7	49.9	15.4	8000	7–14	68	0		Moderate	Diamond OA	0		https://www.emeraldgrouppublishing.com/journal/jice	No	1998	27	No	Dedicated to research on international cooperation, cross-cultural initiatives, and global issues in education.	0	0	0	0	0.575	1	0	0	0	0.859	0
734	Journal of Hospitality and Tourism Horizons	2468-121X	2468-1228	Tourism & Hospitality		Emrald								Specialized	1	Quarterly	400	35	62	1.70183	47.7	74.1	27.1	8000	10–21	0	0	4100	Moderate	Hybrid	12		https://www.emeraldgrouppublishing.com/journal/jhth	No	2024	1	No	Publishes research that explores emerging trends and future challenges in the hospitality and tourism industries.	0.354	0	0	0	0.252	1	0	0	0	0.988	0.858
626	Education Innovations: Systems and Future Learning	2772-5955		Marketing		Emrald								2 categories: Education + Innovation		Quarterly	400	35	62	1.70183	81.3	67.6	16.8	8000	10–21	0	0	2500	Moderate	Hybrid	0		https://link.springer.com/journal/44217	No			No	Focuses on research on innovations in education, future learning models, and educational systems.	0.123	0.113	0.017	0.5	0.532	1	0	0	0	0.929	0
737	Journal of Intellectual Disabilities and Offending Behaviour	2398-7264	2398-7272	Business & Management (General)	Psychology	Emrald		Q4	4	1	0.245	13	0.87	1 category: Disability	13	Quarterly	180	25	62	1.70194	72.2	48.3	13.9	8000	10–21	0	0	4100	Moderate	Hybrid	0		https://www.emeraldgrouppublishing.com/journal/jidob	No	2012	13	No	Publishes research on the needs, risks, and treatment of individuals with intellectual disabilities who engage in offending behavior.	0	0	0	0	0	1	1	0	0	0.794	0
267	Review of Economics and Political Science	2378-9994	2378-9986	Education Management		Emrald		Q2	2.4			12		Multi Category	10	Quarterly	250	29.3	75	1.70806	70.1	43.2	10.4	8000	21–45	150	0	2500	Lengthy	Hybrid	0		https://www.emeraldgrouppublishing.com/journal/reps	No	2015	10	No	Publishes research that explores the intersection of economics and political science, covering policy, governance, and institutional design.	0.052	0.067	0.02	0.75	0	1	1	0	0	0.882	0
10	Records Management Journal	1758-7670	1758-7670	Tourism & Hospitality	Business, Management and Accounting	Emrald	C	Q2	7	3.2	0.547	23	1.9	1 category: Records	34	Semiannual	200	26.1	50	1.70896	77.4	69.8	13.8	8000	7–14	117	0	2950	Moderate	Hybrid	12		https://www.emeraldgrouppublishing.com/journal/rmj	No	1991	34	No	Focuses on records, archives, and information management, covering policy, practice, digital records, and governance.	0.149	0.132	0.035	1	0	1	1	0	0	0	0.878
490	Quarterly Journal of Experimental Psychology	1747-0218	1747-0220	Business & Management (General)	Psychology	Sage	A	Q2	1.4	3.8	0.877	88	2.16	1 category: Experimental Psych	78	Quarterly	800	41.5	70	1.7102	60.9	72.7	21.8	8000	14–30	70	32	3000	Moderate	Hybrid	12		https://journals.sagepub.com/home/qjp	No	1947	78	No	Publishes research across all areas of experimental psychology, emphasizing human cognitive processes.	0.146	0.135	0.354	1	0.156	1	0	0	0	0.991	0.98
456	Grey Systems: Theory and Application	2040-5250	2040-5269	Accounting & Finance		Emrald			4.4			28		1 category: Grey Systems	14	Quarterly	250	29	58	1.71241	83.9	51.7	19.9	8000	7–14	39	0	2500	Moderate	Hybrid	0		https://www.emeraldgrouppublishing.com/journal/gs	No	2011	14	No	Focuses on Grey System Theory (GST), including modeling, prediction, decision-making, and its applications in various complex fields.	0.175	0.175	0.035	1	0	1	1	0	0	0.985	1
431	Industrial and Commercial Training	1758-6941	1758-6941	Business & Management (General)	Business, Management and Accounting	Emrald		Q2	2.1	3.1	0.442	38	1.87	1 category: Training	56	Quarterly	300	31.1	55	1.71612	81	65.8	19.7	9000	7–14	80	0	2340	Moderate	Hybrid	0		https://www.emeraldgrouppublishing.com/journal/ict	No	1969	56	No	Focuses on research and practice related to training, learning, and development in industrial and commercial organizations.	0.179	0.178	0.062	1	0.344	1	1	0	0	0.894	0.865
695	Digital Library Perspectives	2059-580X	2059-5818	Business & Management (General)	Social Sciences	Emrald		Q2	1.2	3.2	0.707	24	2.19	1 category: Digital Library	9	Quarterly	200	25.8	55	1.71675	84.2	68.7	19.7	8000	7–14	45	0	1900	Moderate	Hybrid	0		https://www.emeraldgrouppublishing.com/journal/dlp	No	2016	9	No	Focuses on research on digital libraries, digital collections, and digital information management.	0.216	0.012	0.009	0.5	0.22	1	1	0	0	0.897	0
362	Journal of Chinese Economic and Foreign Trade Studies	1754-4408	1754-4416	Business & Management (General)	Economics, Econometrics and Finance	Emrald	C	Q2	1.6	2.3	0.345	16	3.07	Specialized	17	Quarterly	300	31.1	68	1.71834	77.5	47.8	11.3	8000	14–28	52	0	5120	Moderate	Hybrid	12		https://www.emeraldgrouppublishing.com/journal/jcefts	No	2008	17	No	Publishes research on China's economy, trade, investment, and international business relations.	0.146	0.144	0.038	1	0	1	1	0	0	0.953	0.824
657	Public Budgeting & Finance	0275-1106	1540-5850	HRM & Organizational Behavior		Wiley	C	Q2	1		0.71			1 category: Budgeting	44	Quarterly	300	31	70	1.72118	63.5	76.7	37.8	8000	14–30	29	0	3470	Moderate	Hybrid	12		https://onlinelibrary.wiley.com/journal/15405850	No	1981	44	No	Focuses on research on public sector budgeting, financial management, and fiscal policy at all government levels.	0.321	0.303	0.19	1	0	1	0	0	0	0.994	0.919
377	International Journal of Clothing Science and Technology	0955-6222	1758-7184	Education Management	Materials Science	Emrald		Q3	1.3	2.3	0.284	39	1.43	1 category: Clothing	36	Quarterly	400	34.2	60	1.72243	84.7	68	16.4	8000	7–14	109	0	2500	Moderate	Hybrid	0		https://www.emeraldgrouppublishing.com/journal/ijcst	No	1989	36	No	Publishes research on clothing science, textile technology, apparel engineering, and fashion design.	0.142	0.151	0.05	1	0.524	1	1	0	0	0.994	0.973
55	Scientific Data	2052-4463		Sustainability & Environmental Management	Decision Sciences	Springer		Q1	6.9	11.2	2.41	101	9.55	Multi Category	11	Continuous	2000	48	35	1.72254	79.8	76.8	9.5	8000	3–7	4	0	1590	Easy	Gold OA	0		#N/A	No	2014	11	No	Publishes peer-reviewed data descriptors that promote data sharing, reuse, and scientific rigor.	0.03	0	0	0	0	1	1	0	0	0.891	0
36	Management Matters	2409-5674		Tourism & Hospitality		Emrald								1 category: Management		Quarterly	200	25.5	60	1.72455	60.8	38.6	27.2	8000	10–21	46	0	4150	Moderate		0		https://www.emeraldgrouppublishing.com/journal/mm	No			No	Focuses on research and practice related to general management, strategy, and business leadership.	0.049	0.036	0.018	0.75	0	1	0	0	0	0.829	0.912
868	Science & Justice	1355-0306	1879-1143	Marketing		Elsevier		Q1	2		1.01			1 category: Forensic	65	Quarterly	250	28		1.72652	72.1	74.8	33.8	8000		0	4	3200	Moderate	Hybrid	0		https://www.sciencedirect.com/journal/science-and-justice	No	1960	65	No	The journal of the UK Forensic Science Society, focusing on forensic science, evidence, and justice systems.	0	0	0	0	0	1	0	0	0	0.968	0.986
863	Polar Science	1873-9654	1878-8791	Economics	Earth and Planetary Sciences	Elsevier		Q2	2	4.3	0.602	34	1.75	1 category: Polar	18	Quarterly	300	30		1.73398	56.9	75.4	29.3	8000		0	0	3100	Moderate	Hybrid	12		https://www.sciencedirect.com/journal/polar-science	No	2007	18	No	Focuses on research related to the natural sciences, engineering, and humanities in the polar and cold regions.	0.086	0.113	0.064	1	0	1	0	0	0	0.903	0.797
574	Statistical Methods & Applications	1618-2510	1613-9694	Business & Management (General)		Springer		Q1	0.8		1.23			1 category: Statistics	23	Quarterly	450	35	62	1.73528	77.2	72.3	20.6	10000	10–21	35	0		Moderate	Subscription	0		https://link.springer.com/journal/10260	No	2002	23	No	Publishes research on statistical methods, theory, and their applications in various scientific fields.	0.056	0	0	0.75	0.438	1	0	0	0	0.832	0
495	Mental Illness	2039-7139		Business & Management (General)	Medicine	Emrald		Q3		2.1	0.216	16	0.88	1 category: Mental Health	14	Quarterly	200	25	60	1.73613	54.7	65	13.4	8000	7–14	0	0		Moderate		12		https://mentalhealth.bmj.com/	Yes	2011	14	Yes	Focuses on research on mental illness, mental health disorders, and their impact on individuals and society.	0.127	0.135	0.036	0.75	0.397	1	1	0	0	0.95	0
164	Journal of Financial Management of Property and Construction	2042-5968	2042-5976	Business & Management (General)	Economics, Econometrics and Finance	Emrald	C	Q3	1.9	3.5	0.418	28	2.81	2 categories: Finance + Construction	19	Quarterly	350	32	60	1.74035	77.7	67.7	18.1	8000	7–14	136	0	4030	Moderate	Hybrid	0		https://www.emeraldgrouppublishing.com/journal/jfmpc	No	2006	19	No	Focuses on research on financial management, investment, and economics related to property and construction projects.	0.06	0.07	0.02	0	0.346	1	0	0	0	0.915	0
349	Industrial Robot	0143-991X	1758-6082	Marketing	Engineering	Emrald		Q2	2.5	3.6	0.453	57	2.01	1 category: Robotics	51	Quarterly	600	37.7	58	1.74083	48.7	69.4	24.4	8000	7–14	30	0	3570	Moderate	Hybrid	12		https://www.emeraldgrouppublishing.com/journal/ir	No	1974	51	No	Focuses on research on industrial robotics, automation, and their applications in manufacturing and service industries.	0.093	0.166	0.039	0.75	0	1	1	0	0	0.976	0
951	Journal of the Knowledge Economy	1868-7865	1868-7873	Education Management	Economics, Econometrics and Finance	Springer	C		4	4.2	0.576	38	3.9	2 categories: Knowledge + Economy	16	Quarterly	800	40		1.74185	79.8	72	35.8	8000		36	0	2790	Moderate	Hybrid	12		https://link.springer.com/journal/13132	No	2009	16	No	Focuses on the role of knowledge, intellectual capital, and innovation in economic growth and organizational performance.	0.063	0	0	0	0	1	1	0	0	0.921	0
42	Tourism Critiques	2754-0518	2754-0526	Business & Management (General)		Emrald		Q3			0.14			Specialized	5	Quarterly	250	27.7	60	1.74411	46.9	72.8	19	8000	7–14	51	0	2500	Moderate	Hybrid	12		#N/A	No	2020	5	No	Publishes research that offers critical, theoretical, and socio-cultural perspectives on tourism and leisure.	0.101	0.139	0.05	0.75	0.397	0.952	1	1	0	0.865	0
776	Ground Improvement	1365-7844	1751-8354	Business & Management (General)		Emrald		Q2	1.7		0.77	47		1 category: Ground	27	Quarterly	300	30	60	1.74439	70.4	73	24.3	8000	7–14	55	0	1800	Moderate	Hybrid	12		https://www.icevirtuallibrary.com/journal/jgrim	No	1998	27	No	Focuses on research related to methods and techniques for ground improvement and soil stabilization in geotechnical engineering.	0.09	0.06	0.024	0.75	0.118	1	0	0	0	0.791	0
623	Sustainable Finance Review	2772-5203		Marketing		Emrald								1 category: Sustainable		Quarterly	300	30	68	1.74578	47.6	69.1	17.2	8000	14–28	0	0	3500	Moderate	Gold OA	12		https://link.springer.com/journal/43565	No			No	Focuses on research on sustainable finance, green finance, ESG (Environmental, Social, Governance) investing, and ethical finance.	0.291	0.026	0.008	0	0	1	1	0	0	0.953	0
65	Computational Management Science	1619-6988	1619-6988	Economics	Business, Management and Accounting	Springer	B	Q2	1.3	2.1	0.407	36	1.02	2 categories: Computational + Management	21	Quarterly	300	30	68	1.74578	64.4	71.9	20.9	8000	14–30	6	0		Lengthy		24		https://link.springer.com/journal/10287	No	2004	21	No	Focuses on the application of computational methods, modeling, and data science to management science and business.	0	0	0	0	0	1	1	0	0	0.862	0
767	Saudi Journal of Language Studies	2773-0478	2773-0486	Accounting & Finance		Emrald								1 category: Language	4	Quarterly	250	27.6	58	1.74618	80.1	78	38.1	8000	7–14	39	0	3580	Moderate	Diamond OA	0		https://www.emeraldgrouppublishing.com/journal/sjls	No	2021	4	No	Focuses on research on language, linguistics, and language education with a regional focus on Saudi Arabia.	0.131	0.058	0.018	1	0.788	1	1	0	0	0.894	0.858
324	Maritime Business Review	2397-3757	2397-3757	Business & Management (General)	Business, Management and Accounting	Emrald	C	Q2	2.4	3.8	0.518	14	2.55	1 category: Maritime	9	Quarterly	250	27.6	58	1.74618	65.9	50.6	16.7	8000	7–14	44	0	4290	Moderate	Hybrid	0		https://www.emeraldgrouppublishing.com/journal/mabr	No	2016	9	No	Focuses on research on the management, economics, and policy of the maritime industry, including shipping and ports.	0	0	0	0.75	0	1	0	0	0	0.859	0
383	Mental Health Review Journal	2042-8754	2042-8762	Economics	Medicine	Emrald		Q3	1.1	1.6	0.368	23	1.51	1 category: Mental Health	29	Quarterly	200	24.4	60	1.75002	67.1	67.6	15.3	8000	7–14	150	0		Moderate		0		https://www.emeraldgrouppublishing.com/journal/mhrj	No	1996	29	No	Publishes research on the quality, effectiveness, and policy of mental health services.	0.078	0.096	0.04	1	0	1	0	0	0	0.985	0
682	Journal of Cultural Heritage Management and Sustainable Development	2044-3870	2044-3889	Business & Management (General)	Arts and Humanities	Emrald	C	Q1	1.2	2.7	0.402	20	1.34	2 categories: Heritage + Sustainability	14	Quarterly	400	32.9	68	1.75785	57	72.3	24.8	8000	14–28	131	0	3520	Moderate	Hybrid	0		https://www.emerald.com/jchmsd	No	2011	14	No	Focuses on research on the management, conservation, and sustainable development of cultural heritage.	0.086	0.118	0.031	1	0.331	1	1	0	0	0.979	0
376	Collection and Curation	2515-5854	2515-5862	Accounting & Finance	Arts and Humanities	Emrald		Q1	8	2.1	0.341	21	0.95	1 category: Collections	7	Quarterly	180	22.4	55	1.75972	67.1	64.7	10.9	8000	7–14	110	0	3200	Moderate	Hybrid	0		https://www.emeraldgrouppublishing.com/journal/cc	No	2018	7	No	Provides research and authoritative information on the changing conceptions, purpose, and practice of collection development and curation in libraries, archives, museums, and galleries.	0.049	0.046	0.014	0.5	0	1	0	0	0	0.847	0
537	Theoretical Issues in Ergonomics Science	1463-922X	1744-3067	Business & Management (General)	Social Sciences	T&F		Q2	2	5	0.729	59	2.29	1 category: Ergonomics	25	Quarterly	200	24	65	1.76015	73.8	70.1	14.9	10000	10–21	15	12	3500	Moderate	Hybrid	12		https://www.tandfonline.com/journals/ttie20	No	2000	25	No	Focuses on the theoretical and methodological foundations of ergonomics and human factors.	0.037	0.058	0.017	1	0	1	1	0	0	0.618	0
144	Health Policy and Technology	2210-8354		Business & Management (General)	Engineering	Elsevier	B	Q2	3.7	6.8	1.071	31	4.86	2 categories: Health + Tech	13	Quarterly	500	35	65	1.76573	45.4	68.3	20.9	8000	10–21	17	6	3050	Moderate	Hybrid	12		https://www.sciencedirect.com/journal/health-policy-and-technology	No	2012	13	No	Focuses on the interaction of health policy, management, and new technology, covering adoption, regulation, economics, and ethical issues in healthcare.	0.131	0.63	0.216	1	0	1	1	0	0	0.9	0
772	Urbanization, Sustainability and Society	2772-6854	2772-6862	Business & Management (General)		Emrald								0	2	Quarterly	250	26.3		1.76728	51.6	69.7	22.4	8000		55	0	3500	Easy	Gold OA	12		https://www.emeraldgrouppublishing.com/journal/uss	No	2023	2	No	Focuses on research on the interplay between urbanization, sustainability challenges, and societal development.	1	1	0.291	1	0	0.952	1	1	0	0.991	0.912
928	International Trade, Politics and Development	2772-5955		Education Management		Emrald		Q3			0.15			0	6	Quarterly	200	23.1		1.76949	75.2	72.7	25.6	8000		56	0	3000	Easy	Diamond OA	0		#N/A	No	2019	6	No	Focuses on the intersection of international trade, political economy, and economic development.	0.007	0.01	0.006	0.25	0	1	0	0	0	0	0
395	The Journal of Mental Health Training, Education and Practice	1755-4872	1755-4880	Business & Management (General)		Emrald			1.2			23		0	19	Quarterly	200	23		1.77179	52.5	67.6	12.4	10000		117	0	2500	Easy	Hybrid	12		https://www.emeraldgrouppublishing.com/journal/jmhtep	No	2006	19	No	Focuses on research and practice related to training, education, and professional development in the mental health workforce.	0	0	0	0	0	1	0	0	0	0	0
962	Business Strategy and Development	2572-317X	2572-3188	Strategy & International Business	Economics, Econometrics and Finance	Wiley		Q1	4.2	5	0.674	17	3.73	1 category: Strategy	7	Quarterly	200	23		1.77179	56	69.7	34.6	8000		3	0	3400		Hybrid	12		https://onlinelibrary.wiley.com/journal/25723170	No	2018	7	No	Focuses on the development and implementation of business strategies for growth, competitiveness, and sustainability.	0.168	0	0	0	0	1	1	0	0	0.865	0
133	Journal of Public Mental Health	1746-5723	1746-5731	HRM & Organizational Behavior	Medicine	Emrald		Q2	1.2	2	0.415	24	1.36	1 category: Mental Health	24	Quarterly	300	28.9	62	1.77215	49.6	63.6	11.3	10000	10–21	40	0	3200	Moderate	Hybrid	0		https://www.emeraldgrouppublishing.com/journal/jpmh	No	2001	24	No	Publishes research on mental health policy, services, and public health approaches to mental well-being.	0.063	0.108	0.015	0.5	0.457	1	0	0	0	0.894	0
268	Robotic Intelligence and Automation	2949-644X		Engineering & Technology		Emrald		Q2	4.4			15		1 category: Robotics	4	Quarterly	200	23.2	55	1.77691	75.9	67.6	23.6	8000	7–14	47	0	3400	Moderate	Hybrid	12		https://www.emeraldgrouppublishing.com/journal/ria	No	2021	4	No	Covers research on robotics, intelligent systems, and automation, including design, control, machine learning, and human-robot interaction.	0.093	0.106	0.031	0.75	0	1	0	0	0	0.921	0
514	International Journal of Building Pathology and Adaptation	2398-4702	2398-4710	Business & Management (General)	Engineering	Emrald		Q2	2.1	3.7	0.492	38	2.82	1 category: Building	14	Quarterly	300	28.6	60	1.77928	61.1	68	23.5	8000	7–14	65	0	3500	Moderate	Hybrid	12		https://www.emeraldgrouppublishing.com/journal/ijbpa	No	2011	14	No	Focuses on research related to the diagnosis of building defects, pathology, repair, and adaptation.	0.254	0.024	0.009	0.5	0.799	1	1	0	0	0.721	0
248	Journal of Economics, Finance and Administrative Science	2074-8237		Business & Management (General)		Emrald		Q2		3.9		20		0	9	Quarterly	350	30		1.78085	60.2	44.7	10.2	8000		0	0	1850	Easy	Diamond OA	0		https://www.emeraldgrouppublishing.com/journal/jefas	No	2016	9	No	Publishes research covering economics, finance, and administrative sciences (management, public administration).	0.071	0.101	0.036	1	0.524	1	1	0	0	0.935	0.845
906	Futures & Foresight Science	2573-5182		Tourism & Hospitality		Wiley		Q2		3.9	0.38			Specialized	6	Quarterly	350	30		1.78085	75.3	65	23.4	8000		39	0		Moderate		0		#N/A	Yes	2019	6	No	Publishes research that addresses futures studies, strategic foresight, and forecasting to understand and shape complex, long-term change.	0.131	0.166	0.065	1	0.15	1	0	0	0	0.994	0.939
517	International Journal of Structural Integrity	1757-9872	1757-9880	Business & Management (General)	Engineering	Emrald		Q2	3	3.9	0.426	24	2.77	1 category: Structural	15	Quarterly	400	32	68	1.78143	69.3	70.4	19.6	8000	14–28	31	0	3240	Moderate	Hybrid	12		https://www.emeraldgrouppublishing.com/journal/ijsi	No	2010	15	No	Publishes research on the structural integrity of materials and engineering systems, including fracture mechanics and fatigue.	0.168	0.209	0.068	1	0	1	1	0	0	0.965	0.973
345	Teaching of Psychology	0098-6283	1532-8023	Business & Management (General)	Social Sciences	Sage		Q2	0.7	1.9	0.401	53	1.17	1 category: Psychology	51	Quarterly	300	28.3	60	1.78675	82.7	66.3	19.3	8000	7–14	33	21	3520	Moderate	Hybrid	24		https://journals.sagepub.com/home/top	No	1974	51	No	Focuses on research, instruction, and professional issues related to the teaching of psychology at all educational levels.	0.097	0.12	0.034	1	0	1	0	0	0	0.991	0.986
572	Teaching Public Administration	0144-8846	2049-3614	Business & Management (General)	Social Sciences	Sage		Q2	1.5	1.8	0.412	12	1.52	2 categories: Teaching + Admin	42	Quarterly	250	25.7	60	1.79236	60.2	67.6	31.3	8000	7–14	59	15	3000	Moderate	Hybrid	12		https://journals.sagepub.com/home/tpa	Yes	1983	42	No	Focuses on research and practice related to teaching and pedagogy in public administration and policy.	0.138	0	0	0	0.342	1	0	0	0	0.985	0.959
591	Management Review Quarterly	2198-9905	2198-9913	Education Management		Springer	B	Q1	9	5.6		28		1 category: Management	7	Quarterly	500	34	70	1.79379	77.6	73	25.7	8000	14–30	67	0	3290	Lengthy	Hybrid	12		https://link.springer.com/journal/11301	No	2018	7	No	Publishes research across all fields of management, organization, and business administration.	0	0	0	0.25	0.545	1	0	0	0	0.818	0
533	Regional Studies in Marine Science	2352-4855		Engineering & Technology	Environmental Science	Elsevier		Q1	2.4	3.5	0.508	31	2.22	1 category: Marine	10	Quarterly	500	34	70	1.79379	68.5	72	24.8	8000	14–30	10	4	2700	Moderate	Gold OA	0		https://www.sciencedirect.com/journal/regional-studies-in-marine-science	No	2015	10	No	Publishes original research focused on marine science and oceanography within specific geographic regions.	0	0	0	0.75	0	1	0	0	0	0.971	0.966
782	Surface Innovations	2056-2586	2056-2594	Healthcare Management	Materials Science	Emrald		Q3	3.5	5	0.403	24	3.19	1 category: Surface	12	Quarterly	300	28	60	1.79423	78.7	70.1	21.4	8000	7–14	25	0	3830	Moderate		0		https://www.icevirtuallibrary.com/journal/jsuin	No	2013	12	No	Focuses on novel materials, modification techniques, and technologies related to surfaces and interfaces.	0.116	0	0	0	0	1	0	0	0	0.879	0
489	Public Relations Inquiry	2046-1488	2046-1488	Healthcare Management	Social Sciences	Sage	B	Q1	1.7	3.2	0.582	16	2.18	1 category: PR	13	Quarterly	250	25.4	65	1.80049	84.1	67.6	24.1	8000	10–21	48	15	3000	Moderate	Hybrid	0		https://journals.sagepub.com/home/pri	No	2012	13	No	Publishes research dedicated to critical and theoretical inquiry into public relations and strategic communication.	0.045	0.048	0.031	0.75	0	0.952	1	1	0	0.982	0
229	Facilities	0263-2772	1758-5809	Entrepreneurship & Innovation	Engineering	Emrald	B	Q1	1.9	4.7	0.547	52	2.96	1 category: Facilities	42	Bimonthly	450	32.3	60	1.807	81.2	67.6	19.6	10000	7–14	68	0	3400	Moderate	Hybrid	12		https://www.emeraldgrouppublishing.com/journal/f	No	1983	42	No	Focuses on research and practice related to facilities management, workplace design, and property management.	0	0	0	0	0.489	1	1	0	0	0	0
245	Journal of Enterprising Communities: People and Places in the Global Economy	1750-6204	1750-6212	Business & Management (General)		Emrald			2.5			40		Multi Category	18	Quarterly	250	25.1	62	1.80719	63.5	68.3	17.1	8000	10–21	60	0	3720	Moderate	Hybrid	12		https://www.emeraldgrouppublishing.com/journal/jec	No	2007	18	No	Focuses on community entrepreneurship and local economic development in a globalized context.	0	0	0	0	0	1	1	0	0	0	0
477	Journal of Health Organization and Management	1758-7247	1758-7247	Business & Management (General)	Business, Management and Accounting	Emrald		Q2	2.2	2.6	0.417	48	1.54	2 categories: Health + Management	18	Quarterly	450	32.3	68	1.80844	64.7	69.1	10.2	8000	14–28	78	0	3880	Moderate	Hybrid	12		https://www.emeraldgrouppublishing.com/journal/jhom	Yes	2007	18	No	Focuses on the management, structure, and strategic direction of healthcare organizations, including governance, leadership, and change.	0.004	0.01	0.003	0.5	0	1	0	0	0	0	0
780	Smart Infrastructure and Construction	2056-1164	2056-1172	Economics		Emrald		Q2		3.4	0.42	12		1 category: Smart	7	Quarterly	250	25	65	1.81014	51.2	66.1	14.2	9000	10–21	105	0	2500	Moderate	Hybrid	12		https://www.icevirtuallibrary.com/journal/jsmic	No	2018	7	No	Publishes research on smart technologies, data analytics, and sustainable practices in infrastructure and construction.	0.272	0.325	0.155	1	0	0.952	0	1	0	0.994	0.946
337	Development and Learning in Organizations: An International Journal	1477-7282	1758-6201	Economics		Emrald		Q3		2.7		22		2 categories: Development + Learning	19	Quarterly	400	30.8	58	1.81107	70	66	16.3	9000	7–14	22	0		Easy		12		https://www.emeraldgrouppublishing.com/journal/dlo	No	2006	19	No	Focuses on research and practice related to organizational learning, training, and human resource development.	0.134	0	0	0	0.421	1	1	0	0	0.988	0
129	Journal of Criminological Research, Policy and Practice	2056-3817	2056-3825	Tourism & Hospitality	Social Sciences	Emrald			7	0.8	0.165	11	0.73	0	11	Quarterly	350	28.8		1.81138	84.5	63.9	13.8	12000		56	0	4380	Easy	Hybrid	12		https://www.emerald.com/jcrpp	No	2014	11	No	Publishes research on criminological issues that have clear relevance for public policy, criminal justice practice, and evidence-based solutions.	0	0	0	0	0	1	0	0	0	0	0
905	Journal of Human Resources in Hospitality & Tourism	1533-2845	1533-2853	Tourism & Hospitality		T&F		Q2		3.5	0.48			Specialized	23	Quarterly	400	30		1.82144	76.6	74.4	12.7	8000		0	0	2950	Moderate	Hybrid	0		#N/A	No	2002	23	No	Focuses on research on Human Resources Management (HRM) and organizational behavior in the hospitality and tourism industries.	0.056	0.108	0.028	0.75	0	0.976	0	1	0	0.868	0
457	International Journal of Climate Change Strategies and Management	1756-8690	1756-8704	Accounting & Finance	Social Sciences	Emrald		Q1	3.5	6.9	0.765	31	4.21	2 category: Policy & Law	16	Quarterly	400	30.2	65	1.82804	81.5	71.6	17.1	8000	10–21	64	0	3040	Moderate		12		https://www.emeraldgrouppublishing.com/journal/ijccsm	No	2009	16	No	Focuses on organizational and policy strategies for climate change mitigation and adaptation.	0.052	0.036	0.022	1	0.553	1	1	0	0	0.95	0.831
256	Journal of Professional Capital and Community	2056-9483	2056-9491	Operations & Supply Chain	Psychology	Emrald		Q1	1.7	6.8	1.618	21	5.77	2 categories: Professional + Community	9	Quarterly	350	28.6	65	1.82827	51.1	68	20.1	10000	10–21	67	0	2000	Moderate	Hybrid	0		https://www.emeraldgrouppublishing.com/journal/jpcc	No	2016	9	No	Focuses on research related to professional capital, knowledge sharing, and learning communities in professional sectors.	0.131	0.154	0.028	0.75	0	1	0	0	0	0.991	0.993
48	Journal of Responsible Production and Consumption	2752-7382	2752-7390	Strategy & International Business		Emrald			11			96		2 categories: Sustainability + Business	8	Quarterly	800	37.3	60	1.83116	73.8	70.6	26.7	12000	7–14	65	0	3620	Moderate	Gold OA	0		https://www.sciencedirect.com/journal/journal-of-responsible-production-and-consumption	No	2017	8	No	Focuses on research related to sustainable consumption, responsible production, and the circular economy.	0.056	0	0	0	0	1	0	0	0	0.841	0
725	International Perspectives on Health Equity	2772-5955		Business & Management (General)		Emrald								2 categories: Health + Equity	4	Quarterly	250	24.1	62	1.83132	59.1	74.4	32.6	8000	10–21	147	0		Moderate		0		https://www.emeraldgrouppublishing.com/journal/iphe	No	2021	4	No	Focuses on research on health equity, disparities, and policy from an international and comparative perspective.	0	0	0	1	0.361	1	1	0	0	0.841	0
956	Systems Research and Behavioral Science	1092-7023	1099-1786	Information Systems & Digital Business	Social Sciences	Wiley	A	Q2	1.8	4.6	0.576	53	3.64	1 category: Systems	44	Quarterly	350	28		1.83173	66.2	74.1	24.8	8000		5	0	3990	Moderate	Hybrid	0		https://onlinelibrary.wiley.com/journal/10991743	No	1981	44	No	Focuses on research that links systems science, cybernetics, and behavioral science to address complex problems.	0.265	0.512	0.247	1	0	1	1	0	0	0	0.723
920	The American Economist	0569-4345	1945-8557	Economics		Sage		Q3		1.9	0.35			1 category: Economics	68	Quarterly	250	23.6		1.83203	57.4	73	26.5	8000		45	25		Moderate		12		#N/A	No	1957	68	No	Publishes articles on general economics, economic theory, and applied economics, often including student contributions and focusing on economic education.	0.056	0.029	0.011	0.75	0	1	1	0	0	0.868	0
469	International Journal of Physical Modelling in Geotechnics	2055-0814	2055-0822	Engineering & Technology	Earth and Planetary Sciences	Emrald		Q2	1.2	3.5	0.777	23	1.78	1 category: Geotechnics	38	Quarterly	250	24	62	1.83373	77.9	68.7	26.7	8000	10–21	147	0	2200	Moderate	Hybrid	0		https://www.emeraldgrouppublishing.com/journal/jphmg	No	1987	38	No	Dedicated to research using physical models (e.g., centrifuges) to study geotechnical engineering problems.	0.101	0.147	0.046	1	0	1	0	0	0	0	0.98
739	Journal of International Trade Law and Policy	1475-5632	1758-8625	Business & Management (General)	Economics, Econometrics and Finance	Emrald		Q2	8	0.9	0.176	11	0.74	2 categories: Trade + Law	23	Quarterly	250	24	65	1.83428	68	70.1	19.3	8000	10–21	52	0	2980	Moderate		0		https://www.emeraldgrouppublishing.com/journal/jitlp	No	2002	23	No	Dedicated to the analysis of legal and policy issues concerning international trade, including WTO law, customs, and global commercial policy.	0.22	0.288	0.142	1	0	1	0	0	0	0.988	0.926
683	Qualitative Research Journal	1448-2027	2045-6678	Business & Management (General)	Social Sciences	Emrald		Q2	1.4	2.7	0.557	21	1.44	1 category: Qualitative	24	Quarterly	350	28.3	62	1.83541	61.8	73	22.3	8000	10–21	42	0	2500	Moderate	Hybrid	12		https://www.emerald.com/qrj	No	2001	24	No	Publishes research on the methodology, theory, and practice of qualitative research across the social sciences.	0	0	0	0	0	1	1	0	0	0	0
98	Journal of Islamic Accounting and Business Research	1759-0825	1759-0825	Public Administration & Policy	Business, Management and Accounting	Emrald	C	Q2	2.8	3.3	0.354	26	2.57	1 category: Islamic Finance	15	Quarterly	400	29.9	65	1.8359	64.4	41.4	15.9	10000	10–21	80	0	3450	Moderate		0		https://www.emeraldgrouppublishing.com/journal/jiabr	No	2010	15	No	Dedicated to research on accounting, finance, and business issues within an Islamic framework, including Sharia compliance and ethical practices.	0.19	0	0	0	0.218	1	0	0	0	0.994	0.986
460	International Journal of Ethics and Systems	2514-9360	2514-9379	Strategy & International Business	Arts and Humanities	Emrald	C	Q1	3.2	3.4	0.383	26	2.86	Multi Category	9	Quarterly	250	23.7	60	1.84061	74.9	68	16.5	8000	7–14	46	0	3470	Moderate	Hybrid	0		https://www.emeraldgrouppublishing.com/journal/ijoes	No	2016	9	No	Focuses on the ethical challenges and implications of systems and technology, including AI and information systems.	0	0	0	0.75	0	1	0	0	0	0.756	0
123	Management in Education	0892-0209	1741-9878	HRM & Organizational Behavior		Sage		Q2	3			23		2 categories: Management + Education	39	Quarterly	250	23.4	55	1.84692	84.8	64.3	13.2	8000	7–14	27	19	3500	Moderate	Hybrid	12		https://journals.sagepub.com/home/mie	No	1986	39	No	Focuses on research and practice related to educational leadership, management, and administration within schools and educational settings.	0.116	0.089	0.072	1	0.203	1	0	0	0	0.968	0.98
104	Human Gene	2044-9941		Healthcare Management		Elsevier		Q4	0.7			31		1 category: Genetics	8	Quarterly	250	23	55	1.85657	67.2	69.3	10.4	8000	7–14	16	7	2000	Moderate	Gold OA	0		https://www.sciencedirect.com/journal/human-gene	No	2017	8	No	Focuses on research on the structure, function, and analysis of the human genome and its genes, covering molecular genetics and disease.	0.049	0.144	0.029	0.75	0	1	1	1	0	0.926	0
253	Journal of Internet and Digital Economics	2752-7307	2752-7315	Business & Management (General)		Emrald						10		2 categories: Digital + Economics	4	Quarterly	450	30.4	55	1.85679	76.2	50.3	18.2	8000	5–10	51	0	4330	Moderate	Gold OA	0		https://www.emeraldgrouppublishing.com/journal/jide	No	2021	4	No	Dedicated to research on the economics of the internet, digital platforms, e-commerce, and the digital economy.	0.201	0.231	0.118	1	0.051	1	1	0	0	0.868	0.791
406	Journal of Entrepreneurship and Public Policy	2045-211X	2045-211X	Business & Management (General)	Business, Management and Accounting	Emrald		Q1	1.7	3.3	0.546	17	2.24	2 categories: Entrepreneurship + Policy	13	Quarterly	250	23.1	70	1.85692	73.9	65.8	15.6	8000	14–30	83	0	2500	Moderate	Hybrid	12		https://www.emeraldgrouppublishing.com/journal/jepp	Yes	2012	13	No	Focuses on research on the role of entrepreneurship in public policy and the impact of policy on entrepreneurial activity.	0.075	0.053	0.013	0.75	0.483	1	0	0	0	0.915	0
985	Measuring Business Excellence	1758-8057	1758-8057	Engineering & Technology	Business, Management and Accounting	Emrald	B	Q2	2.8	4.1	0.563	49	3.66	1 category: Excellence	28	Quarterly	300	25		1.85784	51	73	30.6	8000		49	0	3200		Hybrid	0		https://www.emeraldgrouppublishing.com/journal/mbe	No	1997	28	No	Focuses on performance measurement, quality management, and business excellence models and practice.	0.149	0.082	0.018	1	0	1	0	0	0	0.9	0
846	Journal of International Accounting, Auditing and Taxation	1061-9518	1878-1851	Strategy & International Business		Elsevier	B	Q1	3.7		1.21	54		0	33	Quarterly	300	25		1.85784	50.9	73.7	31.4	8000		5	4	3400		Hybrid	0		https://www.sciencedirect.com/journal/journal-of-international-accounting-auditing-and-taxation	No	1992	33	No	Focuses on research on international issues in accounting, auditing, and taxation, including global standards and regulation.	0	0	0	0	0	1	0	0	0	0	0
859	Neurocomputing	0925-2312	1872-8287	Business & Management (General)	Neuroscience	Elsevier		Q1	6.5	10.8	1.481	177	6.75	1 category: Neural	36	Monthly	5000	50	50	1.85873	73.8	72.3	19.7	8000	10-12	9	5	3240	Moderate	Hybrid	0		https://www.sciencedirect.com/journal/neurocomputing	Yes	1989	36	No	Dedicated to research on neural computation, machine learning, and artificial intelligence, covering algorithms, architectures, and applications.	0.175	0.183	0.1	1	0	1	0	0	0	0.959	0.932
453	Journal of Contingencies and Crisis Management	0966-0876	1468-5973	Business & Management (General)	Environmental Science	Wiley		Q2	2.2	6.8	0.962	61	4.24	1 category: Crisis	32	Quarterly	400	29	68	1.86003	48.6	69.3	26.4	8000	14–28	26	0	2950	Moderate	Hybrid	12		https://onlinelibrary.wiley.com/journal/14685973	No	1993	32	No	Focuses on research on organizational crisis management, planning, and contingencies in various sectors.	0.153	0	0	0	0	1	0	0	0	0.988	0
326	Quality in Ageing and Older Adults	2049-8675	2049-8683	Sustainability & Environmental Management	Nursing	Emrald		Q3	6	1.7	0.348	20	1.24	1 category: Ageing	25	Quarterly	200	19.6	55	1.8602	84.6	66.4	14.8	8000	7–14	83	0	2500	Moderate	Hybrid	0		https://www.emeraldgrouppublishing.com/journal/qaoa	No	2000	25	No	Publishes research and practice articles focused on improving the quality of life, care, and services for older adults.	0	0	0	0	0	1	1	0	0	0.571	0
555	International Journal of Qualitative Methods	1609-4069	1609-4077	HRM & Organizational Behavior		Sage		Q1	3.3	5.2	1.05	94		1 category: Qualitative	23	Quarterly	700	35	60	1.86041	58.6	72.3	18.6	8000	7–14	0	0		Moderate		12		https://journals.sagepub.com/home/ijq	No	2002	23	No	Focuses on the methodology, methods, and practice of qualitative research across social and health sciences.	0.037	0.012	0.005	0	0.361	1	1	0	0	0	0
380	Journal of Money Laundering Control	1368-5201	1758-6457	Business & Management (General)	Economics, Econometrics and Finance	Emrald	C	Q1	1.1	2.2	0.327	26	1.74	1 category: Money Laundering	28	Quarterly	300	25.1	68	1.86798	73.7	65.8	13.5	8000	10–21	56	0		Moderate		0		https://www.emeraldgrouppublishing.com/journal/jmlc	No	1997	28	No	Publishes research on the practice, regulation, and policy related to money laundering and financial crime prevention.	0.082	0.087	0.05	1	0	0.952	1	0	0	0.932	0.912
420	TechTrends	8756-389X	1559-7058	Business & Management (General)	Social Sciences	Springer		Q1	3.8	4.5	0.801	48	2.91	2 categories: Tech + Education	67	Quarterly	450	30	60	1.86839	72.8	68.7	16.5	8000	7–14	80	0	2590	Moderate	Hybrid	0		https://link.springer.com/journal/11528	No	1958	67	No	A journal for leaders in educational technology, focusing on practical applications of technology to improve teaching, learning, and performance in various educational settings.	0.037	0	0	0	0.321	1	1	0	0	0.959	0
194	The American Sociologist	0003-1232	1936-4786	Engineering & Technology		Springer	B	Q2	1.1		0.62	24		1 category: Sociology	65	Quarterly	300	25	65	1.86992	62.7	62.7	15.7	8000	10–21	20	0	2590	Moderate	Hybrid	12		https://link.springer.com/journal/12108	No	1960	65	No	Focuses on research and debate regarding the sociology profession, higher education, and the relationship between sociology and public life.	0	0	0	0	0	1	0	0	0	0	0
26	Journal of International Economics and Management	2752-7269	2752-7277	Business & Management (General)		Emrald						15		2 categories: Economics + Management	5	Quarterly	450	30	70	1.87025	82.5	36.4	11.8	10000	14–30	0	0	3470	Lengthy	Diamond OA	0		https://www.emeraldgrouppublishing.com/journal/jiem	No	2020	5	No	Focuses on research on the economic and managerial aspects of international business, trade, and global markets.	0.097	0.089	0.031	1	0	1	1	0	0	0.841	0
34	Journal of Derivatives and Quantitative Studies	2212-3232		Healthcare Management		Emrald		Q3		1.7		5		Specialized	27	Quarterly	300	25	70	1.87085	82.7	40.1	18.6	12000	14–30	0	0	4050	Lengthy	Diamond OA	0		https://www.emeraldgrouppublishing.com/journal/jdqs	No	1998	27	No	Focuses on research on financial derivatives, quantitative finance, and risk management (Korean context).	0	0	0	1	0	1	1	0	0	0.974	0.993
587	The Review of Austrian Economics	0889-3047	1573-7113	Business & Management (General)		Springer	C	Q2	0.4		0.45	39		Specialized	38	Quarterly	300	25	70	1.87085	51.7	69.1	26.8	8000	14–30	16	0		Moderate		0		https://link.springer.com/journal/11138	No	1987	38	No	Dedicated to research that applies the principles and methodology of the Austrian School of Economics.	0.239	0.202	0.039	1	0.256	1	0	0	0	0.912	0
386	Information Economics and Policy	0167-6245	1872-706X	Business & Management (General)	Environmental Science	Elsevier	A	Q1	3.2	4	1.637	52	2.47	Specialized	41	Quarterly	300	25	75	1.87177	56	70.4	24.1	8000	21–45	9	7	4630	Moderate		24		https://www.sciencedirect.com/journal/information-economics-and-policy	No	1984	41	No	Focuses on the economic analysis of information, communication, and network industries, including regulation and policy.	0.06	0.096	0.03	0.75	0.344	1	1	0	0	0.926	0.926
437	Property Management	0263-7472	1758-6228	Marketing	Economics, Econometrics and Finance	Emrald	B	Q3	1.5	2.2	0.35	30	1.5	1 category: Property	42	Quarterly	500	31	68	1.87495	64.3	69.4	10.9	8000	14–28	53	0	2500	Moderate	Hybrid	0		https://www.emeraldgrouppublishing.com/journal/pm	No	1983	42	No	Publishes research and case studies on property management, real estate, and facilities management.	0.097	0.091	0.027	0.75	0	1	1	0	0	0.859	0
547	Australian Journal of Career Development	2200-6974	2043-3485	Business & Management (General)	Business, Management and Accounting	Sage	B	Q2		2.2	0.282	15	1.49	1 category: Career	33	Quarterly	200	19	65	1.87595	78.2	48.9	13.5	8000	10–21	67	34	3670	Moderate	Hybrid	0		https://journals.sagepub.com/home/acd	No	1992	33	No	Publishes research on all aspects of career behavior and development across the lifespan (children, adolescents, and adults) in various settings (school, work, family).	0.291	0	0	0	0.34	1	1	0	0	0.744	0
773	Worldwide Hospitality and Tourism Themes	1755-4214	1755-4222	Business & Management (General)	Social Sciences	Emrald	C	Q2	1.9	3.5	0.423	28	2.33	Specialized	16	Quarterly	300	24.7	60	1.87646	73.4	69.7	22.4	8000	7–14	6	0	2500	Moderate	Hybrid	12		https://www.emeraldgrouppublishing.com/journal/whatt	No	2009	16	No	Focuses on current issues, challenges, and debates in the global hospitality and tourism industry.	0.172	0.183	0.18	1	0	1	1	0	0	0.982	0.872
9	Journal of Science and Technology Policy Management	2053-4639	2053-4639	Business & Management (General)	Decision Sciences	Emrald	C	Q2	3.5	6.6	0.647	24	2.91	1 category: Tech Policy	15	Quarterly	320	25	55	1.8892	53.8	55	21.3	8000	7–14	84	0		Moderate		12		https://www.emeraldgrouppublishing.com/journal/jstpm	No	2010	15	No	Publishes research on the policy, strategy, and management of science, technology, and innovation systems.	0.328	0.048	0.009	0	0	1	0	0	0	0.559	0
116	Journal of Leadership Education	1552-908X		Marketing		Emrald						19		2 categories: Leadership + Education	23	Quarterly	400	27.8	58	1.88958	61.8	63.7	18.3	8000	7–14	42	0	4790	Moderate	Diamond OA	0		https://journalofleadershiped.org	No	2002	23	No	Publishes research and practice-based articles on the theory, design, and delivery of leadership education and development.	0.049	0.05	0.021	0.5	0.41	1	1	0	0	0.968	0
937	Journal of Macromarketing	1552-6534	1552-6534	Business & Management (General)	Business, Management and Accounting	Sage	A	Q2	2.3	4.3	0.82	62	3.47	1 category: Macro	46	Quarterly	300	23.7		1.89004	77.3	75.4	35.2	8000		24	21		Moderate		12		https://journals.sagepub.com/home/jmk	No	1979	46	No	Publishes research on marketing systems, the impact of marketing on society, and the interrelationships of marketing and the environment.	0.063	0.072	0.023	0.75	0	1	1	0	0	0.721	0.892
243	Journal of Contemporary Marketing Science	2752-720X	2752-7218	Marketing		Emrald						15		1 category: Marketing	6	Quarterly	450	29.2	70	1.89162	67.6	49.2	22.7	8000	14–30	140	0	3870	Lengthy	Hybrid	0		https://www.emeraldgrouppublishing.com/journal/jcmars	No	2019	6	No	Publishes research across all areas of marketing science, emphasizing contemporary issues and methods.	0	0	0	1	0	1	1	0	0	0.991	0.973
392	Global Business and Organizational Excellence	1930-4888	1930-4896	Entrepreneurship & Innovation		Wiley	C	Q1		2.6	0.24	32		1 category: Excellence	44	Quarterly	300	24	62	1.89428	66.5	68.4	20.3	8000	10–21	74	0		Moderate		0		https://onlinelibrary.wiley.com/journal/19322062	No	1981	44	No	Focuses on best practices for business and organizational excellence with a global perspective, covering quality, strategy, and change management.	0.049	0.06	0.019	0.75	0	1	0	0	0	0.95	0
929	The CASE Journal	1544-9104	2054-9450	Business & Management (General)		Emrald		Q4		1.5	0.11			1 category: Cases	20	Quarterly	250	21		1.89437	48.3	53.9	25.6	8000		35	0	1500	Moderate	Gold OA	12		#N/A	Yes	2005	20	No	Publishes teaching cases across all areas of business and management to facilitate classroom learning.	0.101	0.111	0.029	0.75	0.397	1	1	0	0	0.885	0
322	Health Education	0965-4283	1758-6392	HRM & Organizational Behavior	Social Sciences	Emrald		Q2	1.9	1.8	0.303	39	1.5	2 categories: Health + Education	58	Bimonthly	500	30.2	65	1.89613	75.6	68.7	20.9	8000	10–21	89	0	3990	Moderate	Hybrid	12		https://www.emeraldgrouppublishing.com/journal/he	No	1967	58	No	Focuses on research and practice in health education and health promotion, covering behavioral, social, and cultural factors.	0.157	0	0	0	0.276	1	0	0	0	0.959	0.946
211	Arts and the Market	2056-4902	2056-4910	Business & Management (General)		Emrald		Q2	1.2			15		2 categories: Arts + Marketing	8	Quarterly	250	21.3	60	1.8985	65.7	64.7	14.8	8000	7–14	78	0	2500	Moderate	Hybrid	12		https://www.emeraldgrouppublishing.com/journal/aam	No	2017	8	No	Focuses on research on marketing, management, and economic issues related to the arts and cultural industries.	0.082	0	0	0	0	1	1	0	0	0	0
241	Journal of Accounting Literature	2452-1462	2452-1462	Entrepreneurship & Innovation	Business, Management and Accounting	Emrald	A	Q3	2.6		1.402	21		1 category: Accounting	43	Quarterly	300	23.9	72	1.89866	50.1	69.9	20.8	8000	14–30	53	0	3200	Moderate	Hybrid	0		https://www.emeraldgrouppublishing.com/journal/jal	No	1982	43	No	A review journal publishing syntheses and critiques of existing research in various areas of accounting.	0.101	0.099	0.025	1	0	1	0	1	0	0.932	0
491	SLAS Technology	2472-7303	2472-7311	Marketing	Health Professions	Elsevier		Q2	3.7	5.4	0.537	25	2.44	1 category: Technology	29	Quarterly	500	30	55	1.89967	49.9	70.4	29.4	8000	5–10	12	2	3000	Moderate	Hybrid	0		https://journals.sagepub.com/home/sla	No	1996	29	No	Focuses on technologies for laboratory automation and screening in the life sciences and drug discovery.	0.119	0	0	1	0	1	0	0	0	0.985	0.77
31	Logistics Research	1860-671X	1860-6728	Sustainability & Environmental Management		Emrald		Q3		2.9	0.45	28		1 category: Logistics	17	Quarterly	500	30	60	1.90061	78.7	67.3	13.5	10000	7–14	0	0	4050	Moderate	Hybrid	12		https://link.springer.com/journal/12159	No	2008	17	No	Publishes research on the theory, methodology, and application of logistics and supply chain management.	0.052	0.034	0.007	0.75	0	1	0	0	0	0.747	0
391	Statistical Papers	1613-9798	1613-9798	Business & Management (General)	Decision Sciences	Springer	B	Q2	1.1	3.1	0.766	42	1.66	1 category: Statistics	67	Quarterly	500	30	65	1.90156	64.6	69.7	23.9	8000	10–21	8	0	2890	Moderate	Hybrid	0		https://link.springer.com/journal/26252	No	1958	67	No	Publishes original research in statistics and its applications, covering theoretical and methodological developments.	0	0	0	0.75	0	1	1	0	0	0.994	0
148	Journal of Business Venturing Insights	2352-6734		Business & Management (General)		Elsevier	A	Q1	6.4	7.9		45		1 category: Venturing	11	Quarterly	500	30	75	1.90345	50.1	75.8	28.6	8000	21–45	8	8		Lengthy		0		https://www.sciencedirect.com/journal/journal-of-business-venturing-insights	No	2014	11	No	Publishes short, high-impact, timely research insights and theoretical extensions related to entrepreneurship and new venture creation.	0.045	0.108	0.04	0.75	0	1	0	0	0	0.944	0.926
687	Built Environment Project and Asset Management	2042-1245	2042-1253	Business & Management (General)	Engineering	Emrald	B	Q1	2.2	4	0.536	28	2.63	2 categories: Built + Management	14	Quarterly	450	28.7	70	1.90498	54.7	68.3	18.2	8000	14–30	46	0	3600	Moderate	Hybrid	0		https://www.emeraldgrouppublishing.com/journal/bepam	No	2011	14	No	Focuses on the management of projects, assets, and facilities in the built environment.	0.146	0.183	0.059	1	0	1	0	1	0	0.947	0
728	Journal of Alternative Finance	2575-1011	2575-102X	Accounting & Finance		Sage								1 category: Alternative	30	Quarterly	200	17.7	65	1.90606	84.2	69.1	17.5	8000	10–21	36	15		Moderate		0		https://www.emeraldgrouppublishing.com/journal/jaf	No	1995	30	No	Focuses on research on non-traditional forms of finance such as crowdfunding, peer-to-peer lending, and FinTech.	0	0	0	0	0.524	1	1	0	0	0	0
254	Journal of Money and Business	2752-734X	2752-7358	Business & Management (General)		Emrald						12		1 category: Finance	4	Quarterly	300	23.5	60	1.90637	75.2	48.2	16.8	8000	7–14	186	0	4580	Moderate	Hybrid	0		https://www.emeraldgrouppublishing.com/journal/jmb	No	2021	4	No	Focuses on research on monetary economics, finance, and their implications for business and management.	0.041	0	0	0	0	1	0	0	0	0.885	0
28	LBS Journal of Management & Research	0972-8031	0974-1852	Business & Management (General)		Emrald						6		1 category: Management	17	Quarterly	180	16	68	1.90731	83	33.5	7.4	8000	14–30	139	0	3470	Lengthy	Diamond OA	0		https://www.informaticsjournals.com/index.php/lbsjmr	No	2008	17	No	Publishes research on management, business, and organizational issues (associated with Lal Bahadur Shastri Institute of Management).	0.272	0.298	0.135	1	0.998	1	1	0	0	0.985	1
236	International Journal of Mentoring and Coaching in Education	2046-6854	2046-6862	Economics	Social Sciences	Emrald		Q2	1.8	2.5	0.493	19	1.71	2 categories: Mentoring + Education	13	Quarterly	300	23.4	60	1.90886	69.1	66.1	18.7	8000	7–14	55	0	4800	Moderate		12		https://www.emeraldgrouppublishing.com/journal/ijmce	No	2012	13	No	Focuses on research and practice related to mentoring, coaching, and professional development in educational contexts.	0.082	0.13	0.065	1	0.455	1	0	1	0	0.971	0.919
4	Library Management	0143-5124	1758-6546	Healthcare Management	Social Sciences	Emrald	C	Q2	1.4	2.3	0.439	38	1.54	2 categories: Business + Library	46	Bimonthly	350	25	54	1.91835	80.7	66	14.7	8000	7–14	84	0		Moderate		0		https://www.emeraldgrouppublishing.com/journal/lm	No	1979	46	No	Publishes research and practice-focused articles on the management and administration of library and information services.	0.03	0.026	0.009	1	0	1	1	0	0	0.876	0
663	Learned Publishing	1741-4857	1741-4857	Accounting & Finance	Social Sciences	Wiley		Q1	2.4	4.3	0.758	41	2.56	1 category: Publishing	37	Quarterly	300	23	58	1.91845	49.1	49.9	16.7	8000	7–14	28	0	4520	Moderate	Gold OA	12		https://onlinelibrary.wiley.com/journal/17414857	No	1988	37	No	Focuses on research and professional practice related to scholarly communication, publishing, and open science.	0	0	0	0	0	1	0	0	0	0.832	0
432	International Journal of Event and Festival Management	1758-2962	1758-2962	Business & Management (General)	Business, Management and Accounting	Emrald	B	Q2	1.9	3	0.562	31	2.59	Specialized	15	Quarterly	350	25	62	1.91988	51.3	70.4	14.1	8000	10–21	61	0	3300	Moderate	Hybrid	0		https://www.emeraldgrouppublishing.com/journal/ijefm	No	2010	15	No	Publishes research on the management, planning, marketing, and impact of events and festivals.	0.075	0	0	1	0	1	0	0	0	0.982	0.75
480	Risk Management	1460-3799	1475-0142	Business & Management (General)	Economics, Econometrics and Finance	Springer	C	Q3	1.7	5	0.437	21	2.38	1 category: Risk	26	Quarterly	350	25	65	1.92045	74.7	70.4	12.1	8000	10–21	26	0		Moderate		12		https://www.palgrave.com/gp/journal/41283	No	1999	26	No	Focuses on research and practice related to all aspects of organizational risk management, assessment, and control.	0	0	0	0	0	1	1	0	0	0	0
174	Competition and Regulation in Network Industries	1783-5917		Business & Management (General)		Sage	B	Q2		2.6	0.4	11		Specialized	20	Quarterly	350	25	72	1.92179	74.1	67.6	17.6	8000	14–30	105	16	4460	Moderate	Hybrid	0		https://journals.sagepub.com/home/crn	Yes	2005	20	No	Interdisciplinary journal focusing on economic, legal, policy, and engineering approaches to competition and regulation in network industries (e.g., telecom, transport, energy).	0.134	0.305	0.103	1	0.321	1	1	0	0	0.924	0.851
568	Recherche et Applications en Marketing (English Edition)	2051-5073		Healthcare Management		Sage		Q2	1		0.78			1 category: Marketing	39	Quarterly	250	20.4	70	1.92212	57.1	69.6	21.5	8000	14–30	62	52	3500	Lengthy	Hybrid	0		https://journals.sagepub.com/home/rme	No	1986	39	No	Publishes research on marketing theory, methodology, and applications, with a focus on French/European research.	0.175	0.25	0.064	1	0	1	0	0	0	0.994	0.986
650	The Journal of Financial Research	0826-3023	1475-6809	Business & Management (General)		Wiley		Q2	2.1		0.81			1 category: Research	47	Quarterly	450	28	70	1.92369	72.1	73.3	33.9	8000	14–30	36	0	3040	Moderate	Hybrid	12		https://onlinelibrary.wiley.com/journal/14793803	No	1978	47	No	Publishes research on all areas of financial research, including corporate finance, investments, and financial institutions.	0.019	0.046	0.035	0.75	0	0	0	1	0	0.971	0
979	Journal of Modelling in Management	1746-5669	1758-7115	Business & Management (General)	Decision Sciences	Emrald	C	Q2	2.2	4.9	0.577	37	3.42	1 category: Modelling	19	Quarterly	300	22.2		1.9272	82.9	70.1	29.7	8000		63	0		Moderate		12		https://www.emeraldgrouppublishing.com/journal/jm2	No	2006	19	No	Focuses on research on the development and application of mathematical and computer models in management.	0.287	0	0.256	1	0.489	0.905	0	0	0	0.912	0.811
439	Quality Assurance in Education	0968-4883	1758-6937	Business & Management (General)	Social Sciences	Emrald		Q2	1.6	2.9	0.391	56	2.09	2 categories: Quality + Education	32	Quarterly	300	22.6	65	1.92975	84.7	70.1	15.7	12000	10–21	29	0	3300	Moderate	Hybrid	12		https://www.emeraldgrouppublishing.com/journal/qae	No	1993	32	No	Focuses on research and practice related to quality assurance, management, and continuous improvement in education.	0.045	0.065	0.019	0.75	0	1	1	0	0	0	0.959
757	Management & Sustainability: An Arab Review	2632-9013	2632-9021	Education Management		Emrald								2 categories: Management + Sustainability	4	Quarterly	250	20	62	1.93025	50.6	42.3	15.9	8000	10–21	39	0	1800	Moderate	Hybrid	0		https://www.emeraldgrouppublishing.com/journal/msar	No	2021	4	No	Publishes research on management and sustainability issues with a focus on the Arab world and Middle East.	0.086	0.062	0.013	0.75	0	1	1	0	0	0.803	0
120	Journal of Industrial Relations	1472-9296	1472-9296	Business & Management (General)	Business, Management and Accounting	Sage	A	Q1	2.6		1.165	37	2.09	1 category: Industrial Relations	67	Quarterly	500	28.8	65	1.93416	57	47.8	17.6	8000	10–21	43	28	3500	Moderate	Hybrid	12		https://journals.sagepub.com/home/jir	No	1958	67	No	Publishes research on industrial relations, employment, and work with an emphasis on the Australian and Asia-Pacific context.	0.179	0	0	0	0	1	0	0	0	0.982	0.986
925	Asian Journal of Economics and Banking	2633-7983	2633-7991	Business & Management (General)		Emrald		Q3			0.22			2 categories: Economics + Banking	4	Quarterly	350	23.9		1.93604	57.6	46.9	17.1	8000		80	0	2800	Easy	Gold OA	12		#N/A	Yes	2021	4	No	Publishes research on economic issues and the banking/financial sector in Asia.	0.489	0.406	0.154	1	0	1	0	0	0	0.929	0.932
7	International Journal of Sports Marketing and Sponsorship	1463-5798	1758-7593	Business & Management (General)	Economics, Econometrics and Finance	Emrald	B	Q2	2.7	4.7	0.621	29	3.02	2 categories: Marketing + Sports	25	Quarterly	250	19.6	62	1.9399	46.1	47	19.6	8000	10–20	28	0	2500	Moderate	Hybrid	12		https://www.emeraldgrouppublishing.com/journal/ijsms	No	2000	25	No	Publishes research on marketing, sponsorship, and business issues within the sports industry.	0.034	0	0	0	0.389	1	0	0	0	0.797	0
804	Computational Statistics	1613-9658	1613-9658	Business & Management (General)	Decision Sciences	Springer		Q2	1.4	2.3	0.619	49	1.8	1 category: Computational	39	Quarterly	500	28		1.94326	58.1	72	22.4	8000		7	0		Moderate	Subscription	0		https://www.sciencedirect.com/journal/computational-statistics-and-data-analysis	No	1986	39	No	Focuses on research on the interface between statistics and computation, including algorithms, software, and simulation techniques.	0.142	0.106	0.029	1	0.169	0.952	1	1	0	0.888	0
816	Forensic Science International: Digital Investigation	2090-5390	2589-2236	Education Management		Elsevier		Q1	2.2		1.24	68		1 category: Digital	16	Quarterly	600	30		1.94471	75.6	74.4	28.3	12000		7	39	2800	Moderate	Hybrid	12		https://www.sciencedirect.com/journal/forensic-science-international-digital-investigation	No	2009	16	No	Focuses on research related to digital forensics, cybercrime investigation, and the analysis of digital evidence.	0.045	0	0	0	0	1	0	0	0	0.976	0
783	Urban Design and Planning	1755-0797	1755-0800	HRM & Organizational Behavior		Emrald			1.6			18		1 category: Urban	16	Quarterly	200	16	62	1.94485	78	69.3	19.2	8000	10–21	73	0		Moderate		0		https://www.icevirtuallibrary.com/journal/jurdp	No	2009	16	No	Focuses on research on urban design, city planning, and the built environment.	0	0	0	1	0.953	1	1	0	0	0.982	0.973
968	International Journal of Organizational Analysis	1758-8561	1758-8561	Strategy & International Business	Business, Management and Accounting	Emrald	B	Q2	2.9	4.9	0.592	36	3.53	1 category: Analysis	29	Quarterly	500	27.9		1.94596	73.1	53.9	30.2	8000		40	0	3500	Moderate	Hybrid	12		https://www.emeraldgrouppublishing.com/journal/ijoa	No	1996	29	No	Publishes research on organizational studies and organizational theory, focusing on rigorous empirical and theoretical analysis.	0.063	0.096	0.032	0.75	0	1	0	0	0	0	0.959
741	Journal for Multicultural Education	2053-5368	2053-5368	Sustainability & Environmental Management	Social Sciences	Emrald		Q1	1.3	1.5	0.365	13	1.44	2 categories: Multicultural + Education	11	Quarterly	350	23.9	58	1.94726	55	69.4	21.4	8000	7–14	39	0	3390	Moderate	Hybrid	12		https://www.emeraldgrouppublishing.com/journal/jme	No	2014	11	No	Focuses on research related to multicultural education, diversity, and equity in educational settings.	0.127	0.163	0.116	1	0	1	0	0	0	0	0
699	European Journal of Training and Development	2046-9020	2046-9020	Business & Management (General)	Business, Management and Accounting	Emrald	C	Q1	2.8	4	0.621	65	3	2 categories: Training + Development	47	Quarterly	500	28.3	68	1.94832	58.3	69.4	20.1	8000	14–28	55	0	3150	Moderate	Hybrid	0		https://www.emeraldgrouppublishing.com/journal/ejtd	No	1978	47	No	Focuses on research on training, learning, and development in organizational and professional contexts, with a European perspective.	0.045	0.038	0.008	0.75	0	1	0	0	0	0.876	0
991	Humanities and Social Sciences Communications	2662-9994		Marketing	Arts and Humanities	Springer		Q1	3.6	3	0.705	21	3.81	Multi Category	11	Continuous	1000	35		1.95	50.4	70.4	22.4	8000		28	0		Easy		0		https://www.nature.com/hsscomms/	No	2014	11	No	An open-access journal covering all areas of the humanities and social sciences, facilitating broad scholarly exchange.	0.045	0.019	0.005	0.75	0.686	1	0	0	0	0	0
705	Fulbright Review of Economics and Policy	2752-6785		Economics		Emrald								1 category: Policy	7	Quarterly	150	11	70	1.95028	63.3	73.3	19.3	10000	14–30	19	0	1200	Lengthy	Diamond OA	0		https://www.emeraldgrouppublishing.com/journal/frep	No	2018	7	No	Focuses on research on economics and public policy, often linked to international perspectives.	0.049	0.053	0.02	0.75	0	1	1	1	0	0.944	0
187	Public Administration Quarterly	0734-9149		Business & Management (General)		Sage	A	Q3		2	0.2	5		1 category: Public Admin	48	Quarterly	350	23.8	65	1.95118	50.1	63.6	11.3	8000	10–21	45	46	2900	Moderate		12		https://journals.sagepub.com/home/paq	No	1977	48	No	Publishes articles on public administration theory and practice, focusing on bureaucratic politics, ethics, and public sector issues.	0.265	0	0	0	0	1	1	0	0	0.912	0
140	Journal of Financial Services Marketing	1363-0348	1479-1996	Business & Management (General)	Economics, Econometrics and Finance	Springer	B	Q2	4.3	3.9	0.457	25	5.12	1 category: Financial Marketing	29	Quarterly	500	28	60	1.95492	56.1	66.4	21.6	9000	7–14	2	0	3730	Moderate	Hybrid	12		https://www.palgrave.com/gp/journal/14791838	No	1996	29	No	Publishes research on the marketing of financial services, including banking, insurance, and investments.	0	0	0	0.5	0.34	1	1	0	0	0.844	0
584	Public Organization Review	1566-7170	1573-7059	Education Management		Springer		Q1	1.7		0.98	38		1 category: Organization	24	Quarterly	500	28	70	1.95686	68.6	68.3	28.9	8000	14–30	103	0	3190	Moderate	Hybrid	0		https://link.springer.com/journal/11115	Yes	2001	24	No	Publishes research on the theory and practice of public organizations and public management.	0.037	0.041	0.018	0.75	0	1	1	0	0	0.885	0
601	AI & SOCIETY	0269-721X	1435-5655	Marketing		Springer			4.7			64		2 categories: AI + Society	38	Quarterly	600	30	65	1.95735	47.7	69.3	22.6	8000	10–21	8	0	3190	Moderate	Hybrid	0		https://link.springer.com/journal/146	No	1987	38	No	Focuses on the interplay between Artificial Intelligence and society, covering ethical, cultural, political, legal, and economic implications of AI technology.	0.037	0	0	0.75	0	1	0	0	0	0.518	0
287	Journal of Behavioral and Experimental Economics	2214-8029		Business & Management (General)	Social Sciences	Elsevier	A	Q1	1.4	2.7	0.721	72	1.79	Specialized	11	Quarterly	600	30	70	1.95832	76.9	69.7	20.3	8000	14–30	4	14	3200	Moderate	Hybrid	24		https://www.sciencedirect.com/journal/journal-of-behavioral-and-experimental-economics	No	2014	11	No	Publishes research using behavioral and experimental methods to study economic decision-making and market behavior.	0.216	0.034	0.014	0.5	0	1	0	0	0	0.759	0
570	Social Marketing Quarterly	1524-5004	1555-5205	Business & Management (General)	Economics, Econometrics and Finance	Sage	B	Q2	1.4	5	0.817	33	3.14	1 category: Social Marketing	30	Quarterly	200	15.4	62	1.95874	58.1	69.4	25.8	8000	10–21	50	13	3000	Moderate	Hybrid	0		https://journals.sagepub.com/home/smq	No	1995	30	No	Focuses on research on the application of marketing principles to influence social behavior and improve societal well-being.	0.056	0.053	0.022	0.75	0	1	1	0	0	0.994	0
351	Nurse Leader	1541-4610	1541-4629	Business & Management (General)	Nursing	Elsevier		Q2	1.4	1.5	0.315	15	1.19	1 category: Nursing	22	Quarterly	400	25	55	1.96228	83	64.3	12.9	8000	7–14	17	31	2800	Moderate	Hybrid	0		https://www.nurseleader.com/	No	2003	22	No	A practice-focused journal providing insights and research on leadership, management, and administration for nurses in executive roles.	0.075	0	0	1	0	1	0	0	0	0.95	0.986
141	Journal of Asset Management	1479-179X	1479-179X	Business & Management (General)	Decision Sciences	Springer		Q2	1.4	2.7	0.482	20	3.07	1 category: Asset Management	25	Quarterly	400	25	62	1.96364	75.8	68.8	18.8	8000	10–21	33	0		Moderate		0		https://www.palgrave.com/gp/journal/41260	No	2000	25	No	Publishes research on asset management, investment strategy, portfolio construction, and financial engineering.	0.149	0.132	0.053	1	0	0.976	0	1	0	0.976	0
150	Journal of Contextual Behavioral Science	2212-1442		Business & Management (General)	Neuroscience	Elsevier		Q1	3	6.9	1.465	40	5.17	1 category: Behavioral	10	Quarterly	400	25	65	1.96423	79.4	65	14.2	8000	10–21	5	3	3710	Moderate	Hybrid	0		https://www.sciencedirect.com/journal/journal-of-contextual-behavioral-science	No	2015	10	No	Focuses on research related to Contextual Behavioral Science (CBS) and its applications in psychology and behavior analysis.	0	0	0	0.25	0	1	1	0	0	0.976	0
499	International Review of Finance	1369-7629	1468-2443	Healthcare Management	Economics, Econometrics and Finance	Wiley	A	Q2	2.6	2.8	0.508	23	1.8	Specialized	25	Quarterly	400	25	72	1.9656	58.1	50.6	23.3	10000	14–30	72	0	3350	Moderate		0		https://onlinelibrary.wiley.com/journal/14682443	No	2000	25	No	Publishes research on all areas of finance with an international and global scope.	0.041	0.055	0.042	1	0	1	0	0	0	0.985	0
532	Mathematical Social Sciences	0165-4896	1873-1009	Engineering & Technology	Social Sciences	Elsevier	A	Q1	0.7		0.343	40	0.74	Specialized	44	Quarterly	400	25	75	1.96618	77.5	70.4	30.5	8000	21–45	2	6	2800	Lengthy	Hybrid	0		https://www.sciencedirect.com/journal/mathematical-social-sciences	No	1981	44	No	Focuses on research that uses mathematical models and methods to analyze social and behavioral phenomena.	0.28	0.257	0.092	1	0.233	1	0	0	0	0.988	0.993
382	Journal of Public Procurement	1535-0118		Entrepreneurship & Innovation	Social Sciences	Emrald		Q2	2.3	3.2	0.588	20	2.95	1 category: Procurement	24	Quarterly	250	18.5	65	1.96702	84.2	68.7	22.6	8000	10–21	56	0	3500	Moderate	Hybrid	12		https://www.emeraldgrouppublishing.com/journal/jopp	No	2001	24	No	Dedicated to research and practice related to public sector procurement, supply management, and contracting.	0.049	0	0	0.75	0	1	0	0	0	0.974	0
669	Corporate Philanthropy Report	1041-0309		HRM & Organizational Behavior		Wiley						6		1 category: Philanthropy	29	Quarterly	150	10	55	1.96925	46.1	69.1	21.3	8000	7–14	0	0		Easy	Subscription			https://onlinelibrary.wiley.com/journal/19492299	No	1996	29	No	Generally covers the practices, trends, scale, and impact of institutional philanthropy globally, including foundation finances and operating strategies.	0.071	0.046	0.022	1	0.729	1	1	0	0	0.915	0.811
426	Applied Stochastic Models in Business and Industry	1526-4025	1526-4025	Education Management	Business, Management and Accounting	Wiley	B	Q2	1.5	2.5	0.439	44	1.35	Multi Category	30	Quarterly	300	21	68	1.97023	79.8	71.6	22.8	8000	14–28	20	0	3800	Moderate	Hybrid	24		https://onlinelibrary.wiley.com/journal/15264025	No	1995	30	No	Focuses on the theory and application of stochastic models in business, finance, and industrial processes.	0.129	0.224	0.048	1	0.464	1	0	0	0	0.956	0
643	Review of European, Comparative & International Environmental Law (RECIEL)	0966-1643	1467-9388	Economics		Wiley		Q1	2.3		0.91			0	33	Quarterly	500	27		1.97025	78.4	72	20.3	8000		9	0	2830		Hybrid	0		https://onlinelibrary.wiley.com/journal/14679402	No	1992	33	No	Focuses on legal and policy developments in international, European, and comparative environmental law.	0.269	0	0	0	0	1	0	0	0	0.95	0.899
487	International Journal of Cross Cultural Management	1741-2838	1741-2838	Business & Management (General)	Social Sciences	Sage	B	Q1	2.4	2.5	0.514	52	2.44	2 categories: Cross-Cultural + Management	24	Quarterly	300	21	72	1.97102	79.2	71.6	18.7	8000	14–30	71	16	3500	Lengthy	Hybrid	0		https://journals.sagepub.com/home/ccm	No	2001	24	No	Dedicated to research on the management and organizational issues in cross-cultural and international settings.	0	0	0	0	0	1	0	0	0	0.803	0
712	International Journal of Comparative Education and Development	2633-1492	2633-1506	Business & Management (General)	Social Sciences	Emrald		Q2	1.4	1.9	0.255	8	1.07	2 categories: Comparative + Development	6	Quarterly	250	18.3	62	1.97126	79.6	46.9	16.1	8000	10–21	43	0	3750	Moderate	Hybrid	0		https://www.emeraldgrouppublishing.com/journal/ijced	No	2019	6	No	Publishes research on education systems and development issues from a comparative and international perspective.	0.138	0.269	0.086	1	0	0.952	0	1	0	0.982	0
238	International Journal of Public Leadership	2059-4676	2059-4684	Business & Management (General)		Emrald		Q3	1.5			10		1 category: Leadership	10	Quarterly	200	14.8	63	1.97283	46.2	65	12.9	12000	10–21	29	0	2500	Moderate	Hybrid	12		https://www.emeraldgrouppublishing.com/journal/ijpl	No	2015	10	No	Focuses on research on leadership, governance, and management in the public sector.	0.09	0	0	0	0	1	0	0	0	0.885	0
903	Cogent Business & Management	2331-1975	2331-1975	Business & Management (General)		T&F		Q3	2.9		0.58			Multi Category	11	Continuous	800	32		1.9741	51.5	63.4	33.6	8000		3	13	1350	Easy	Gold OA	0		#N/A	No	2014	11	No	An open-access journal covering all areas of business, management, and accounting, facilitating broad scholarly exchange.	0.351	0.202	0.073	1	0	0.952	0	1	0	0.988	0
433	International Journal of Intelligent Unmanned Systems	2049-3177	2049-3185	Economics	Engineering	Emrald		Q3	1.3	2.7	0.344	14	1.89	1 category: Unmanned	12	Quarterly	200	14.6	58	1.97648	58.8	68.7	23.5	8000	7–14	28	0	2940	Moderate	Hybrid	12		https://www.emeraldgrouppublishing.com/journal/ijius	No	2013	12	No	Focuses on research on intelligent unmanned systems (e.g., drones, autonomous vehicles), covering control, AI, and applications.	0	0	0	0	0	1	1	0	0	0.9	0
21	IIM Ranchi Journal of Management Studies	2394-8783	2394-8791	Economics		Emrald						8		1 category: Management	13	Quarterly	150	9.7	65	1.97778	83.7	35.6	8.7	8000	14–30	35	0	3840	Lengthy	Diamond OA	0		https://www.emeraldgrouppublishing.com/journal/iimr	No	2012	13	No	Publishes research on management and business studies from IIM Ranchi, often focusing on Indian/emerging market contexts.	0	0	0	0	0	1	1	0	0	0.9	0
122	Labor Studies Journal	0195-2681	1548-2516	Business & Management (General)		Sage	B	Q2		1.5	0.16	28		1 category: Labor	49	Quarterly	200	14.1	62	1.98884	63.3	62.9	16.8	10000	10–21	25	36		Moderate		0		https://journals.sagepub.com/home/lsj	No	1976	49	No	Focuses on labor, working-class history, and industrial relations, with an emphasis on social, political, economic, and cultural issues facing workers and their organizations.	0.041	0.038	0.014	0.5	0	1	0	0	0	0.874	0.757
124	Knowledge and Process Management	1099-1441	1099-1441	Business & Management (General)	Business, Management and Accounting	Wiley	B	Q2	1.7	4.8	0.572	49	4.77	1 category: Knowledge	31	Quarterly	400	24	58	1.98904	53.5	66	19.5	8000	7–14	46	0	3500	Moderate	Hybrid	0		https://onlinelibrary.wiley.com/journal/10991457	No	1994	31	No	Focuses on research on knowledge management, organizational processes, and business process management.	0	0	0	0	0.534	1	0	0	0	0.994	1
648	International Journal of Selection and Assessment	1468-2389	1468-2389	Business & Management (General)	Business, Management and Accounting	Wiley	A	Q1	2.4	3.5	0.827	69	2.44	1 category: Selection	32	Quarterly	400	24	70	1.99141	77.4	71.6	31.3	8000	14–30	37	0	2900	Moderate	Hybrid	12		https://onlinelibrary.wiley.com/journal/14682419	No	1993	32	No	Publishes research on the science and practice of psychological selection and assessment in work and organizational settings.	0.164	0.111	0.035	1	0.444	1	1	0	0	0.874	0
355	Measurement Techniques	0543-1972	1573-890X	Business & Management (General)	Physics and Astronomy	Springer		Q4	0.4	0.7	0.215	24	0.44	1 category: Measurement	67	Quarterly	300	20	62	1.99398	81.6	66.1	14.5	8000	10–21	0	0	3570	Moderate	Hybrid	12		https://link.springer.com/journal/11018	No	1958	67	No	A translated Russian journal focusing on measurement science, instrumentation, and metrology.	0	0	0	0	0.259	1	0	0	0	0.974	0.98
125	System Dynamics Review	1099-1727	1099-1727	Healthcare Management	Business, Management and Accounting	Wiley	A	Q1	2.5	4.6	0.986	63	4.32	1 category: System Dynamics	40	Quarterly	300	20	70	1.99557	82.3	67.7	22.8	8000	14–30	24	0		Moderate		0		https://onlinelibrary.wiley.com/journal/10991727	No	1985	40	No	Publishes research on system dynamics methodology and its application to the analysis and modeling of complex feedback systems.	0.093	0	0	0	0	1	1	0	0	0.862	0
481	European Journal of Industrial Relations	1461-7129	1461-7129	Business & Management (General)	Business, Management and Accounting	Sage	A	Q1	2	4.8	1.146	48	3	1 category: Industrial Relations	30	Quarterly	400	23.8	70	1.99665	61.8	72	25.8	8000	14–30	19	23	3990	Moderate	Hybrid	12		https://journals.sagepub.com/home/ejd	No	1995	30	No	Publishes research on industrial relations, employment, and labor policy in Europe.	0.049	0.07	0.034	0.75	0.321	1	1	0	0	0.994	0
901	IT-Director	1464-5390		Economics		Springer								1 category: IT	27	Quarterly	100			2	79	64.3	9.8	8000		0	0		Easy				Manual search needed	Yes	1998	27	No	A journal or publication focused on management and strategic issues for IT executives and directors.	0.041	0	0	0.5	0	1	0	0	0	0	0.858
974	International Journal of Tourism Cities	2056-5607	2056-5615	Business & Management (General)	Social Sciences	Emrald	C	Q1	2.3	5.8	0.747	22	3.44	Specialized	10	Quarterly	600	28		2.00027	57.8	69.1	24.3	8000		0	0		Moderate		12		https://www.emeraldgrouppublishing.com/journal/ijtc	No	2015	10	No	Focuses on research on the planning, development, governance, and management of cities as tourism destinations.	0.313	0.401	0.144	1	0.216	0.952	1	1	0	0.847	0.926
341	Cybernetics and Systems Analysis	1060-0396	1573-8330	Information Systems & Digital Business	Computer Science	Springer		Q3	0.6	1.5	0.29	28	0.71	1 category: Cybernetics	60	Quarterly	450	25	60	2.00185	47.9	63.7	18.5	8000	7–14	0	0	3190	Moderate	Hybrid	0		https://link.springer.com/journal/10559	No	1965	60	No	Focuses on cybernetics and systems theory, including mathematical modeling of complex systems, information theory, and control processes.	0.157	0	0	0	0	1	0	0	0	0.709	0
794	Asian Business & Management	1472-4782	1740-8754	Business & Management (General)		Springer		Q2	2.8		0.76			2 categories: Business + Asia	23	Quarterly	450	25	68	2.00344	69.3	70.4	26.3	8000	14–28	47	0	3000	Moderate	Hybrid	12		https://www.palgrave.com/gp/journal/41291	No	2002	23	No	Covers international business, management, industrial relations, and corporate governance research specifically in the context of Asian economies and cultures.	0.134	0.151	0.117	1	0	0.952	1	0	0	0.897	0
727	Journal of Aggression, Conflict and Peace Research	1759-6599	1759-6602	Business & Management (General)	Social Sciences	Emrald			8	1.4	0.245	19	0.95	0	16	Quarterly	300	19.1		2.00399	84.9	68.7	16.1	8000		17	0	2900	Easy	Hybrid	12		https://www.emeraldgrouppublishing.com/journal/jacpr	No	2009	16	No	Publishes research on the causes, consequences, and management of aggression, violence, conflict, and peace across various contexts, drawing on psychology, sociology, and criminology.	0.104	0.087	0.019	0.75	0	1	0	0	0	0.912	0
366	Central European Journal of Operations Research	1613-9178	1613-9178	Business & Management (General)	Decision Sciences	Springer	C	Q3	2.3	4.9	0.516	38	2.14	1 category: Operations	32	Quarterly	450	25	72	2.00424	84.5	70.3	26.8	9000	14–30	10	0	3040	Moderate	Hybrid	12		https://link.springer.com/journal/10100	No	1993	32	No	Focuses on research in Operations Research (OR) and management science with relevance to Central European countries.	0.22	0	0	0	0.389	1	0	0	0	0.979	0.966
235	International Journal of Lean Six Sigma	2040-4174	2040-4174	Marketing	Decision Sciences	Emrald	B	Q1	3.7	8.8	0.93	47	5.76	1 category: Lean	15	Quarterly	600	28.3	62	2.00428	74.9	70.4	23.1	8000	10–21	80	0	3400	Moderate	Hybrid	12		https://www.emeraldgrouppublishing.com/journal/ijls	No	2010	15	No	Dedicated to research and practice on Lean, Six Sigma, and other continuous improvement methodologies in various organizational settings.	0.101	0.123	0.027	1	0.423	1	0	0	0	0.797	0
594	Service Business	1862-8524	1862-8524	Operations & Supply Chain	Business, Management and Accounting	Springer	B	Q1	4.1	7	0.901	39	6.15	1 category: Service	16	Quarterly	700	30	70	2.00551	71.2	70.4	33.2	8000	14–30	3	0	3190	Moderate	Hybrid	12		https://link.springer.com/journal/11628	Yes	2009	16	No	Publishes research on service strategy, innovation, management, and technology in both business-to-consumer and business-to-business settings.	0.228	0.257	0.108	1	0.397	1	0	0	0	0.968	0.932
257	Journal of Property Investment & Finance	1463-578X	1758-2974	HRM & Organizational Behavior		Emrald	B	Q2	2		0.79	42		1 category: Property	42	Bimonthly	400	23.3	68	2.00935	71.8	69.4	22.8	10000	14–28	18	0	3630	Moderate		12		https://www.emeraldgrouppublishing.com/journal/jpif	No	1983	42	No	Publishes research on real estate investment, finance, and valuation.	0.194	0.19	0.069	1	0	1	0	0	0	0.947	0
507	Asian Education and Development Studies	2046-522X	2046-5238	Marketing	Social Sciences	Emrald		Q2	2	3.2	0.391	17	2.39	2 categories: Education + Asia	14	Quarterly	250	16.7	62	2.00987	57.1	46.9	19.8	8000	10–21	40	0	3400	Moderate	Hybrid	0		https://www.emeraldgrouppublishing.com/journal/aeds	No	2011	14	No	Focuses on research on education, training, and human development issues in the Asian region.	0	0	0	0	0	1	1	0	0	0.841	0
212	Asian Association of Open Universities Journal	2717-578X	2717-5798	Accounting & Finance		Emrald		Q2		2		8		1 category: Open Education	39	Quarterly	200	13.1	55	2.01059	64.5	39.9	8.7	12000	7–14	84	0		Moderate	Diamond OA	0		https://www.emeraldgrouppublishing.com/journal/aaouj	No	1986	39	No	Focuses on research on open and distance learning, technology-enhanced education, and management in open universities.	0	0	0	0	0	1	0	0	0	0	0
637	Contemporary Economic Policy	1465-7287	1465-7287	Business & Management (General)	Business, Management and Accounting	Wiley	B	Q2	1.9	2.4	0.737	56	1.56	1 category: Policy	43	Quarterly	500	26	70	2.01122	59.5	72	13.2	12000	14–30	49	0	3470	Moderate	Hybrid	0		https://onlinelibrary.wiley.com/journal/14657287	No	1982	43	No	Publishes research on contemporary economic policy issues using applied economic analysis.	0.119	0.171	0.08	1	0.447	1	1	1	0	0.979	0.926
89	Business Information Review	0266-3821	1742-1250	Business & Management (General)		Sage		Q2		1.2	0.13	26		1 category: Business Info	41	Quarterly	200	13	52	2.01231	58.6	63.7	16.1	8000	7–14	54	20	2880	Moderate	Hybrid	12		https://journals.sagepub.com/home/bir	No	1984	41	No	Publishes articles on information and knowledge management in organizations, focusing on commercial information management issues for both academics and practitioners.	0.063	0.046	0.016	0.75	0	1	0	0	0	0.838	0
781	Structures and Buildings	0965-0911	2044-7663	Economics		Emrald			1.4			52		1 category: Structures	16	Quarterly	600	28	68	2.01387	73.8	71.6	23.7	8000	14–28	134	0	3400	Moderate		0		https://www.icevirtuallibrary.com/journal/jstbu	No	2009	16	No	Focuses on research on the design, analysis, construction, and performance of civil engineering structures and buildings.	0.067	0	0	0	0	1	1	0	0	0.994	0.959
964	Competitiveness Review	2051-3143	2051-3143	Marketing	Business, Management and Accounting	Emrald	C	Q1	3.2	5	0.654	34	3.63	1 category: Competitiveness	34	Quarterly	300	18.6		2.01638	61.8	75.1	21.8	8000		32	0	3360	Easy	Hybrid	12		https://www.emeraldgrouppublishing.com/journal/cr	No	1991	34	No	Publishes research on firm, industry, and national competitiveness and strategy, emphasizing global issues.	0.104	0.175	0.094	1	0.13	0.976	1	1	0	0.991	0.764
522	Pacific Accounting Review	1176-6014	2408-5452	Business & Management (General)	Economics, Econometrics and Finance	Emrald	B	Q2	2.5	3.5	0.432	27	2.45	1 category: Accounting	37	Quarterly	200	12.8	62	2.01894	61.1	49.4	18.5	8000	10–21	38	0	2500	Moderate	Hybrid	12		https://www.emeraldgrouppublishing.com/journal/par	No	1988	37	No	Focuses on research on accounting, auditing, and financial reporting issues relevant to the Pacific Rim region.	0	0.005	0.005	0.25	0	1	1	0	0	0.085	0
310	Foresight	1463-6689	1746-9902	Business & Management (General)	Economics, Econometrics and Finance	Emrald	C	Q1	3.1	4.1	0.477	36	2.73	Multi Category	26	Quarterly	500	25.5	62	2.0232	84	69.4	21.8	8000	10–21	107	0	3900	Moderate	Hybrid	12		https://www.emeraldgrouppublishing.com/journal/fs	No	1999	26	No	Focuses on long-range planning, futures studies, and foresight methodology and practice.	0.396	0.327	0.167	1	0.308	0.905	1	1	0	0.976	0
242	Journal of Accounting & Organizational Change	1832-5912	1832-5920	Business & Management (General)		Emrald	B		3			40		2 categories: Accounting + Org Change	20	Quarterly	350	20.9	65	2.02544	46.1	68.6	19.4	8000	10–21	48	0	2500	Moderate	Hybrid	0		https://www.emeraldgrouppublishing.com/journal/jaoc	No	2005	20	No	Focuses on the interrelationship between accounting, organizational change, and management practice.	0.328	0.031	0.011	0.75	0	1	1	0	0	0.85	0
95	The Bottom Line	0888-045X	1526-0925	Business & Management (General)		Emrald		Q2	7.3	4.1		15		1 category: Finance for Libraries	38	Quarterly	300	18.6	55	2.02747	85	63	12.8	8000	7–14	48	0	2500	Moderate	Hybrid	0		https://www.emeraldgrouppublishing.com/journal/bl	No	1987	38	No	Focused on library financial management and administration, including budgets, cost analysis, fundraising, and economic issues in libraries.	0	0	0	1	0.274	1	0	0	0	0	0
354	Evaluation	1095-885X	1572-834X	HRM & Organizational Behavior	Social Sciences	Sage	B	Q1	1.6	4.9	0.893	57	1.72	1 category: Evaluation	50	Quarterly	500	25.3	60	2.02823	63.8	68.4	18.1	8000	7–14	62	41	3500	Moderate	Hybrid	12		https://journals.sagepub.com/home/evi	Yes	1975	50	No	Focuses on research on the methodology, theory, and practice of program and policy evaluation.	0	0	0	0	0	1	0	0	0	0.853	0
251	Journal of Humanities and Applied Social Sciences	2772-5955		Marketing		Emrald						10		2 categories: Humanities + Social	4	Quarterly	200	12.4	63	2.0284	66.6	46.9	12.3	8000	10–21	39	0	2800	Moderate	Hybrid	0		https://www.emeraldgrouppublishing.com/journal/jhass	Yes	2021	4	No	Focuses on research across humanities and applied social sciences, covering culture, society, policy, and human behavior.	0.131	0	0	0	0.481	1	1	0	0	0.988	0.986
486	BRQ Business Research Quarterly	2340-9444	2340-9444	Public Administration & Policy	Business, Management and Accounting	Sage		Q1		7.8	0.894	36	3.14	1 category: Business	11	Quarterly	400	22.5	70	2.03071	62.7	70.1	20.3	10000	14–30	0	0		Moderate	Diamond OA	0		https://journals.sagepub.com/home/brq	No	2014	11	No	Fosters the development of research in Industrial Organization, Marketing, Accounting, Knowledge Management, and Corporate Governance with a European perspective.	0	0	0	0	0	1	1	0	0	0.947	0.953
988	Society and Business Review	1746-5699	1746-5699	Marketing	Business, Management and Accounting	Emrald	B	Q1	4.6	3.1	0.539	9	3.39	1 category: Society	19	Quarterly	200	11.6		2.03411	73.3	72	29.4	8000		37	0	3200		Hybrid	0		https://www.emeraldgrouppublishing.com/journal/sbr	No	2006	19	No	Focuses on the interaction between business and society, including ethical issues, CSR, and the societal impact of business decisions.	0.052	0.079	0.05	1	0.368	0.952	1	1	0	0.994	0
375	International Journal for Lesson and Learning Studies	2046-8288	2046-8296	Business & Management (General)	Social Sciences	Emrald		Q1	1	2.3	0.557	21	1.68	2 categories: Learning + Lessons	13	Quarterly	200	12.1	58	2.03434	51.3	48.7	12.1	8000	7–14	21	0	3200	Moderate	Hybrid	12		https://www.emerald.com/ijlls	No	2012	13	No	Focuses on research on lesson study, learning study, and professional development in education.	0.03	0.048	0.037	0.75	0.397	0.952	1	1	0	0.715	0
266	Public Administration and Policy	2581-9334	2589-9958	Business & Management (General)		Emrald		Q2	8	2.9		12		1 category: Public Admin	33	Quarterly	300	18.4	72	2.03588	48	45.6	11.8	8000	14–30	74	0	3980	Lengthy		12		https://www.emeraldgrouppublishing.com/journal/pap	Yes	1992	33	No	Covers research on public sector management, policy analysis, governance, and administrative theory at all levels of government.	0.093	0.096	0.021	0	0	1	0	0	0	0.903	0
87	Journal of Fluency Disorders	0094-730X	1873-1890	Business & Management (General)	Nursing	Elsevier		Q1	1.4	3.8	1.296	62	2.59	1 category: Speech Disorders	51	Quarterly	500	25	65	2.03738	71.9	60.4	9.8	8000	10–21	3	7	3320	Moderate	Hybrid	12		https://www.sciencedirect.com/journal/journal-of-fluency-disorders	No	1974	51	No	Publishes research on the nature, diagnosis, and treatment of fluency disorders, primarily stuttering.	0.067	0	0	0	0	1	0	0	0	0.897	0
597	Operational Research	1866-1505	1866-1505	Business & Management (General)	Decision Sciences	Springer	C	Q2	2.7	4.6	0.651	29	2.95	1 category: Operations	21	Quarterly	500	25	70	2.0384	63	72	18.4	8000	14–30	44	0	2700	Moderate	Hybrid	12		https://link.springer.com/journal/12351	No	2004	21	No	A journal covering the theory, methodology, and applications of operational research (OR), decision sciences, and optimization.	0.056	0.072	0.026	1	0	1	0	0	0	0.759	0
276	Journal of Brand Management	1479-1803	1479-1803	Business & Management (General)	Business, Management and Accounting	Springer	A	Q1	4.1	7.9	1.09	62	5.68	1 category: Branding	32	Quarterly	500	25	70	2.0384	62.4	72.6	25.1	8000	14–30	19	0	3000	Moderate	Hybrid	0		https://www.palgrave.com/gp/journal/41262	No	1993	32	No	Dedicated to research on brand strategy, brand equity, and the management of corporate and product brands.	0.09	0.091	0.039	1	0	1	0	0	0	0.938	0
250	Journal of Global Responsibility	2041-2567	2041-2575	Business & Management (General)		Emrald	C	Q2	3.9			27		2 categories: Responsibility + Global	15	Quarterly	250	15.3	60	2.04324	48.3	64.7	14.5	8000	7–14	49	0	3270	Moderate	Hybrid	0		https://www.emeraldgrouppublishing.com/journal/jgr	No	2010	15	No	Focuses on research related to corporate social responsibility (CSR) and sustainability from a global perspective.	0.09	0.137	0.043	1	0.312	1	1	0	0	0.982	0
723	Information and Learning Sciences	2398-6240	2398-6259	Marketing		Emrald		Q1	2.2		0.97			2 categories: Information + Learning	8	Quarterly	400	21.9	58	2.044	57.3	69.4	24.3	10000	7–14	50	0	3400	Moderate	Hybrid	12		https://www.emeraldgrouppublishing.com/journal/ils	No	2017	8	No	Focuses on research at the intersection of information science, learning, and knowledge management.	0	0	0	0.75	0	1	0	0	0	0.8	0
501	Decision Sciences Journal of Innovative Education	1540-4609	1540-4609	Strategy & International Business	Decision Sciences	Wiley	C	Q3	1	2.9	0.604	26	2.37	2 categories: Decision + Education	22	Quarterly	300	18	65	2.04444	79.3	69.1	30.8	8000	10–21	7	0	3400	Moderate	Hybrid	12		https://onlinelibrary.wiley.com/journal/15404614	No	2003	22	No	Focuses on pedagogy, curriculum, and research related to teaching decision sciences, business analytics, and information systems.	0	0	0	0.75	0.513	1	0	0	0	0.921	0
864	Rangeland Ecology & Management	1550-7424	1938-4251	Sustainability & Environmental Management		Elsevier		Q1	2.4		1.17			1 category: Rangeland	77	Quarterly	700	28		2.04847	53.3	77.1	24.6	8000		0	0	3000	Moderate	Hybrid	0		https://www.sciencedirect.com/journal/rangeland-ecology-and-management	No	1948	77	No	Publishes research on the ecology, conservation, and management of rangeland ecosystems and resources, including grazing and wildlife.	0	0	0	0	0	1	1	0	0	0	0
467	Journal of Information, Communication and Ethics in Society	1477-996X	1477-9978	Information Systems & Digital Business	Arts and Humanities	Emrald			1.9	3.1	0.44	24	2.18	0	22	Quarterly	300	17.3		2.04858	66.5	67.6	18.1	9000		75	0		Moderate		12		https://www.emeraldgrouppublishing.com/journal/jices	No	2003	22	No	Focuses on ethical, social, and policy issues surrounding information, communication, and technology.	0.067	0.087	0.044	1	0.543	1	0	0	0	0.894	0
346	Minerva	0026-4695	1572-8641	Business & Management (General)	Social Sciences	Springer		Q1	3.2	4.3	0.773	48	2.53	Multi Category	63	Quarterly	350	20	68	2.04909	64.8	67.6	16.7	8000	14–28	13	0	3040	Moderate	Hybrid	0		https://link.springer.com/journal/11024	No	1962	63	No	Focuses on the historical, social, and policy aspects of science, technology, and learning, examining the relationship between science and society.	0	0	0	0	0	1	0	0	0	0.456	0
416	Group Decision and Negotiation	0926-4708	1572-9923	Sustainability & Environmental Management	Arts and Humanities	Springer	A	Q1	2.5	5.2	0.631	66	2.77	1 category: Negotiation	33	Quarterly	350	20	70	2.0495	81.8	70.4	27.3	8000	14–30	8	0	3770	Moderate	Hybrid	0		https://link.springer.com/journal/10726	No	1992	33	No	Focuses on research on the theory, methodology, and application of group decision-making and negotiation.	0.045	0.101	0.043	1	0	1	0	0	0	0.997	0
792	Maritime Economics & Logistics	1463-5844	1476-5604	Economics		Springer	B		4.8			61		1 category: Maritime	21	Quarterly	350	20	72	2.04991	47.4	72.3	24.5	No limit	14–30	0	0	3000	Moderate	Hybrid	12		https://www.palgrave.com/gp/journal/41278	Yes	2004	21	No	Publishes research on the economics, logistics, and management of maritime transport and port operations.	0	0	0	0.75	0	1	1	0	0	0.894	0.905
966	International Journal of Innovation Science	1757-2223	1757-2231	Marketing	Engineering	Emrald		Q1	2.9	5.6	0.708	22	3.89	1 category: Innovation	14	Quarterly	350	19.2		2.05561	53.2	69.4	23.5	8000		60	0	3400	Moderate	Hybrid	0		https://www.emeraldgrouppublishing.com/journal/ijis	No	2011	14	No	Focuses on the science and theory of innovation, covering knowledge creation, diffusion, and management.	0.302	0.26	0.08	1	0	1	0	0	0	0.871	0
261	Journal of Tourism Futures	2055-5913	2055-5921	Business & Management (General)	Environmental Science	Emrald	C	Q1	6.6	8.7	0.759	27	5.53	Specialized	10	Quarterly	300	17.4	60	2.05838	49.6	68.7	19.7	8000	7–14	31	0	3690	Moderate		12		https://www.emeraldgrouppublishing.com/journal/jtf	No	2015	10	No	Focuses on forecasting, trend analysis, and strategic foresight applied to the tourism, travel, and hospitality industries.	0	0	0	0	0.22	1	0	0	0	0	0
771	The Learning Organization: An International Journal	0969-6474	1758-7109	Tourism & Hospitality		Emrald		Q1	2.7		0.92			1 category: Learning	31	Quarterly	400	21.4	65	2.05851	50	65	13.9	8000	10–21	48	0	3200	Moderate	Hybrid	0		https://www.emeraldgrouppublishing.com/journal/tlo	No	1994	31	No	Focuses on research on organizational learning, knowledge creation, and the learning organization concept.	0	0	0	0	0	1	1	0	0	0	0
698	European Journal of Management Studies	2749-3701		Business & Management (General)		Emrald	C					15		1 category: Management	4	Quarterly	350	19.6	65	2.05873	86.6	69.7	26.9	10000	10–21	52	0		Moderate	Diamond OA	0		https://www.emeraldgrouppublishing.com/journal/ejms	No	2021	4	No	Publishes research across all fields of management and business administration, often with a European perspective.	0.071	0.113	0.037	0.5	0	1	0	0	0	0.888	0
115	Journal of Health and Human Services Administration	1079-3739		Healthcare Management		Sage		Q4		2	0.19	23		1 category: Health Admin	47	Quarterly	300	17.4	65	2.0594	68.8	60	11.9	10000	10–21	46	40		Moderate	Subscription	0		https://jhhsa.spaef.org	No	1978	47	No	Focuses on theoretical and practical issues related to the administration and management of health and human services organizations, including policy, planning, and evaluation.	0	0	0	1	0.226	1	0	0	0	0	0.939
41	Rajagiri Management Journal	0972-9968	2582-7476	Education Management		Emrald		Q3			0.16			1 category: Management	22	Quarterly	160	7.1	66	2.06114	65.4	31.4	8.2	8000	14–30	53	0	3200	Lengthy	Diamond OA	0		#N/A	No	2003	22	No	Publishes research on management, business, and organizational issues (associated with Rajagiri College of Social Sciences).	0.101	0	0	0.75	0.397	1	1	0	0	0.897	0
549	Competition & Change	1024-5295	1477-2242	Business & Management (General)		Sage		Q2	3.4		0.82			Multi Category	29	Quarterly	400	21.2	75	2.0658	57.4	72	34.8	8000	21–45	36	25	3990	Moderate		0		https://journals.sagepub.com/home/cac	No	1996	29	No	An interdisciplinary journal focusing on geopolitical economy, global competition, and patterns of economic and political change.	0.082	0	0	0.75	0	1	0	0	0	0.997	0.98
869	Science of Computer Programming	0167-6423	1873-1211	Engineering & Technology	Mathematics	Elsevier		Q3	1.4	3.5	0.517	67	1.61	1 category: Programming	47	Quarterly	900	30		2.06797	84.2	74.1	28.2	8000		6	5	2930	Moderate	Hybrid	12		https://www.sciencedirect.com/journal/science-of-computer-programming	Yes	1978	47	No	Publishes research on the theoretical and practical aspects of computer programming, emphasizing techniques, languages, and formal methods.	0.153	0.075	0.029	1	0.301	1	0	0	0	0.982	0.872
508	African Journal of Economic and Management Studies	2040-0704	2040-0712	Business & Management (General)	Economics, Econometrics and Finance	Emrald	C	Q2	1.9	3	0.325	24	1.68	2 categories: Economics + Africa	15	Quarterly	200	10.7	65	2.06818	57.1	39.3	12.5	8000	10–21	52	0	2500	Moderate	Hybrid	0		https://www.emeraldgrouppublishing.com/journal/ajems	No	2010	15	No	Focuses on research on economic and management issues relevant to African economies and organizations.	0	0	0	0	0.271	1	1	0	0	0.988	0.926
523	Qualitative Research in Financial Markets	1755-4171	1755-418X	Business & Management (General)	Economics, Econometrics and Finance	Emrald	B	Q2	2.5	2.9	0.337	24	2.6	2 categories: Qualitative + Finance	16	Quarterly	300	17	68	2.06999	71	68.3	13.2	8000	14–28	68	0	2500	Moderate	Hybrid	0		https://www.emeraldgrouppublishing.com/journal/qrfm	No	2009	16	No	Dedicated to qualitative research methods and their application in financial markets, institutions, and decision-making.	0.097	0.123	0.038	1	0	1	1	0	0	0.853	0
325	Multidiscipline Modeling in Materials and Structures	1574-0670	1758-7550	Healthcare Management	Materials Science	Emrald		Q3	1.9	4.8	0.361	28	2.22	2 categories: Materials + Modeling	20	Quarterly	600	25.8	60	2.07376	62.7	70.1	22.1	8000	7–14	37	0		Moderate		0		https://www.emeraldgrouppublishing.com/journal/mmms	No	2005	20	No	Publishes research on the multiscale and multidisciplinary modeling of materials and structural systems.	0.037	0	0	0	0	1	0	0	0	0.659	0
541	Journal of Workplace Learning	1366-5626	1758-3709	Economics	Psychology	Emrald	C	Q2	1.7	3.2	0.547	56	2.45	2 categories: Learning + Workplace	28	Quarterly	400	20.7	62	2.07623	49.3	69.7	29.1	8000	10–21	35	0	2500	Moderate	Hybrid	0		https://www.emeraldgrouppublishing.com/journal/jwl	No	1997	28	No	Publishes research on workplace learning, organizational learning, and human resource development in vocational contexts.	0	0	0	1	0	1	1	0	0	0.997	0.993
960	Agribusiness	0742-4477	1520-6378	Education Management	Agricultural and Biological Sciences	Wiley		Q1	2	4.8	0.767	49	3.88	2 categories: Agri + Business	40	Quarterly	300	16		2.08078	66.3	75.4	19.7	8000		6	0	1700	Moderate	Hybrid	12		https://onlinelibrary.wiley.com/journal/15206297	Yes	1985	40	No	Publishes research on the economics, management, and policy of the agribusiness food sector.	0.026	0	0	0	0	1	1	0	0	0.976	0
851	Journal of Multinational Financial Management	1042-444X	1872-7493	HRM & Organizational Behavior	Economics, Econometrics and Finance	Elsevier	B	Q1	4	6.6	0.937	51	4.53	1 category: Multinational	34	Quarterly	400	20		2.08165	76	77.1	32.5	8000		3	6	3500	Moderate	Hybrid	12		https://www.sciencedirect.com/journal/journal-of-multinational-financial-management	No	1991	34	No	Focuses on financial management of multinational corporations (MNCs), covering foreign exchange, international capital markets, and taxation.	0.157	0	0	0.75	0	1	1	0	0	0.865	0
866	Research in Social Stratification and Mobility	0276-5626	1873-5853	Information Systems & Digital Business		Elsevier		Q1	2		1.56	61		1 category: Stratification	42	Quarterly	400	20		2.08165	82.3	53.9	35.7	8000		13	5	3240	Moderate	Hybrid	0		https://www.sciencedirect.com/journal/research-in-social-stratification-and-mobility	No	1983	42	No	Focuses on research on social stratification, social mobility, and inequality across societies.	0.201	0.168	0.047	1	0.297	1	0	1	0	0	0
567	Public Works Management & Policy	1087-7249	1552-7532	Business & Management (General)		Sage		Q1	1		0.92			1 category: Public Works	29	Quarterly	300	16.4	68	2.08496	69	68.3	17.9	8000	14–28	57	14	3500	Moderate	Hybrid	12		https://journals.sagepub.com/home/pwm	Yes	1996	29	No	Focuses on research and policy related to the management, finance, and policy of public works and infrastructure.	0	0	0	0	0	1	1	0	0	0	0
959	Health Information and Libraries Journal	1471-1834	1471-1842	Business & Management (General)	Social Sciences	Wiley		Q1	1.4	6.5	0.909	49	3.84	2 categories: Health + Library	41	Quarterly	250	13		2.08621	71.9	71.6	28.4	8000		14	0	3470		Hybrid	0		https://onlinelibrary.wiley.com/journal/14711842	No	1984	41	No	Focuses on research related to health information management, health informatics, and libraries in healthcare settings.	0	0	0	0	0.481	1	1	0	0	0.906	0
488	Economic and Industrial Democracy	1461-7099	1461-7099	Business & Management (General)	Business, Management and Accounting	Sage		Q1	2.3	3.8	0.903	45	1.98	1 category: Democracy	45	Quarterly	450	21.9	68	2.08625	72.4	69.3	26.9	8000	14–28	53	35	4220	Moderate		12		https://journals.sagepub.com/home/eid	No	1980	45	No	Focuses on research on industrial relations, workplace democracy, and social and political organization of the economy.	0.328	0.05	0.021	0.5	0	1	0	0	0	0.871	0
978	Journal of Family Business Management	2043-4155	2043-4163	Entrepreneurship & Innovation	Economics, Econometrics and Finance	Emrald		Q1	3.4	4.6	0.644	24	3.94	1 category: Family	14	Quarterly	500	22.7		2.0863	57	71.6	33.1	8000		3	0	2500	Moderate	Hybrid	0		https://www.emeraldgrouppublishing.com/journal/jfbm	No	2011	14	No	Dedicated to research on the management, governance, and strategy of family businesses.	0.03	0.041	0.032	0.75	0	1	1	0	0	0.974	0.946
100	Scientific Reports	2045-232X		Business & Management (General)	Multidisciplinary	Springer		Q1	3.9	7.5	0.973	282	4.44	Multi Category	14	Continuous	10000	48	35	2.08728	60.2	77.9	7.3	8000	3–7	21	0	2590	Easy	Hybrid	0		https://www.nature.com/srep/	No	2011	14	No	An open-access, multidisciplinary journal publishing original research in all areas of science and medicine.	0.489	0.421	0.167	1	0.297	1	1	0	0	0.994	0
641	British Journal of Industrial Relations	1467-8543	1467-8543	Marketing	Business, Management and Accounting	Wiley	A*	Q1	2.2	4.1	1.433	79	3.01	1 category: Industrial	62	Quarterly	700	27	75	2.0925	48.1	50.6	21.7	8000	21–45	4	0	3500	Lengthy	Hybrid	12		https://onlinelibrary.wiley.com/journal/14678543	No	1963	62	No	Publishes high-quality research on industrial relations, employment relations, work organization, and labor markets from an international and multidisciplinary perspective.	0	0	0	1	0	1	1	0	0	0.997	0.932
196	Evolutionary Psychological Science	2198-9883	2198-9891	Business & Management (General)	Psychology	Springer		Q2	1.5	3.2	0.675	18	1.88	1 category: Evolutionary Psych	10	Quarterly	400	20	62	2.09455	76.8	65.3	11.9	8000	10–21	3	0	4460	Moderate	Hybrid	12		https://link.springer.com/journal/40806	No	2015	10	No	Publishes research that applies evolutionary theory to human psychology and behavior.	0.049	0.05	0.018	0.75	0	1	0	0	0	0.909	0
335	International Journal of Testing	1530-5053	1530-5061	Business & Management (General)	Psychology	T&F		Q3	1.4	4	0.602	24	1.95	1 category: Testing	24	Quarterly	300	16	68	2.09493	63.2	69.9	21.6	8000	14–28	18	0	3040	Moderate	Hybrid	12		https://www.tandfonline.com/journals/hijt20	No	2001	24	No	Publishes research on the theory, methodology, and applications of testing and assessment in various domains.	0.481	0.38	0.148	1	0	0.952	0	1	0	0	0.953
575	Annals of the Institute of Statistical Mathematics	0020-3158	1572-9761	Public Administration & Policy	Mathematics	Springer	A	Q2	0.6	2.1	0.655	49	1.19	1 category: Statistics	76	Quarterly	400	20	65	2.09518	79.5	50.6	18.9	12000	10–21	0	0		Moderate	Subscription	12		https://link.springer.com/journal/10463	No	1949	76	No	Publishes research on statistical theory, applied statistics, and statistical computing.	0.25	0.202	0.065	1	0.06	1	0	0	0	0.968	0.946
30	Journal of Humanitarian Logistics and Supply Chain Management	2042-6755	2042-6755	Business & Management (General)	Business, Management and Accounting	Emrald	C	Q1	2.8	5.4	0.743	31	4.77	1 category: Supply Chain	14	Quarterly	400	19.9	63	2.09738	67.3	70.1	21.7	9000	10–21	51	0		Moderate	Diamond OA	0		https://www.emeraldgrouppublishing.com/journal/jhlscm	No	2011	14	No	Dedicated to research on logistics, supply chain, and operations management in humanitarian and disaster relief contexts.	0	0	0	0	0	1	1	0	0	0	0
206	International Journal of Tourism Research	1099-2340	1522-1970	Business & Management (General)	Environmental Science	Wiley	A	Q1	5.7	7.6	1.298	75	5.94	Specialized	26	Monthly	600	25	70	2.0982	64.8	72.6	28.3	8000	14–30	208	0	3800	Lengthy	Hybrid	12		https://onlinelibrary.wiley.com/journal/15221970	No	1999	26	No	Publishes peer-reviewed research and scholarly papers on tourism, travel, and hospitality, with a focus on empirical studies.	0.082	0.077	0.043	1	0.376	0.976	1	1	0	0.894	0
367	Journal of Financial Services Research	0920-8550	1573-0690	Business & Management (General)	Economics, Econometrics and Finance	Springer	A	Q2	2	2.3	0.754	57	1.76	Specialized	37	Quarterly	600	25	75	2.09924	66.7	72	24.1	8000	21–45	17	0	4250	Moderate	Hybrid	0		https://link.springer.com/journal/10693	No	1988	37	No	Publishes research on the economics and regulation of the financial services industry, including banking, insurance, and securities.	0	0	0	0	0.321	1	0	0	0	0	0
1058	Expert Systems with Applications	0957-4174	1744-7976	Business & Management (General)	Computer Science	Elsevier	C	Q1	7.5	12.6	1.873	249	10.35	1 category: Expert	35	Semimonthly	15000	50	65	2.10162	46.9	80.3	43.9	8000	10–21	7	5	3170	Lengthy		12		#N/A	No	1990	35	No	Aims to publish high-quality research on the design, development, testing, and application of expert systems and intelligent knowledge-based systems in business, industry, and commerce.	0.127	0	0	1	0	1	0	0	0	0.924	0
945	Small Group Research	1046-4964	1552-8415	Business & Management (General)	Psychology	Sage	A	Q1	1.9	5.4	1.128	80	3.73	1 category: Group	55	Quarterly	500	22.1		2.1025	82.4	75.1	32.2	8000		46	31	2460	Moderate	Hybrid	0		https://journals.sagepub.com/home/sgr	No	1970	55	No	Dedicated to research on the structure, process, and outcomes of small groups in organizational and social contexts.	0.153	0.168	0.06	1	0.265	1	1	0	0	0	0
118	Applied Psychological Measurement	0146-6216	1945-3598	Economics	Psychology	Sage	B	Q1	1.2	2.7	0.981	70	1.17	1 category: Psychometrics	48	Quarterly	350	17.9	68	2.10288	73.6	67.3	20.7	12000	14–30	74	13	3200	Lengthy	Hybrid	0		https://journals.sagepub.com/home/apm	No	1977	48	No	Focuses on research on the application of psychological measurement methods, testing, and psychometrics.	0.216	0.231	0.108	1	0	1	0	0	0	0.959	0.919
569	Simulation & Gaming	1046-8781	1552-8237	Business & Management (General)		Sage		Q1	1.8		0.94			2 categories: Simulation + Gaming	55	Quarterly	400	19.7	65	2.10304	50.5	72	19.2	8000	10–21	45	18	3630	Moderate	Hybrid	0		https://journals.sagepub.com/home/sag	Yes	1970	55	No	Focuses on research and application of simulation, gaming, and role-playing methodologies in education, training, and research.	0	0	0	0	0	1	1	0	0	0	0
867	Resource and Energy Economics	0928-7655	1873-9255	Business & Management (General)		Elsevier	A	Q1	3.1		1.67			2 categories: Resource + Energy	32	Quarterly	300	15		2.10555	55.9	73.3	31.4	8000		7	7	3800	Moderate	Hybrid	24		https://www.sciencedirect.com/journal/resource-and-energy-economics	No	1993	32	No	Publishes research on the economics of natural resources and energy, covering policy, conservation, and environmental issues.	0.455	0.543	0.21	1	0	1	1	0	0	0.956	0.953
83	Journal of Property, Planning and Environmental Law	2044-6489	2044-6497	Marketing	Social Sciences	Emrald			3	3.1	0.359	15	2.44	0	16	Quarterly	350	17.2		2.10649	76.4	65.3	12.1	8000		44	0	2500	Moderate	Hybrid	12		https://www.emeraldgrouppublishing.com/journal/jppel	No	2009	16	No	Dedicated to research on the legal and policy aspects of property rights, town planning, and environmental regulation.	0	0	0	0.75	0.733	1	0	0	0	0	0
270	Smart and Sustainable Built Environment	2046-6099	2046-6102	Education Management	Engineering	Emrald	C	Q1	4.6	6.5	0.791	23	5.51	Multi Category	17	Quarterly	500	22.4	65	2.10801	84.4	69.3	21.7	8000	10–21	36	0	2500	Moderate	Hybrid	0		https://www.emeraldgrouppublishing.com/journal/sasbe	Yes	2008	17	No	Publishes research on technologies, systems, and policies for creating smart and sustainable buildings, infrastructure, and urban environments.	0	0	0	0.75	0	1	1	0	0	0.929	0
512	Critical perspectives on international business	1758-6062	1758-6062	Business & Management (General)	Business, Management and Accounting	Emrald	B	Q2	2.3	3.5	0.682	34	2.82	1 category: Critical	20	Quarterly	400	19.5	72	2.10974	63.3	71.6	18.2	8000	14–30	37	0		Moderate		0		https://www.emeraldgrouppublishing.com/journal/cpoib	No	2005	20	No	Publishes research that offers critical, non-mainstream, and heterodox perspectives on international business and globalization.	0.03	0.053	0.008	0.5	0.368	1	1	0	0	0.965	0
407	Journal of Financial Regulation and Compliance	2054-9418		Business & Management (General)	Economics, Econometrics and Finance	Emrald	C	Q3	1.8	1.7	0.246	22	1.26	2 categories: Finance + Regulation	32	Quarterly	400	19.5	72	2.10974	71.2	69.4	21.4	8000	14–30	35	0		Moderate		12		https://www.emeraldgrouppublishing.com/journal/jfrc	Yes	1993	32	No	Publishes research on the regulation, compliance, and governance of financial institutions and markets.	0.052	0	0	0	0	1	0	0	0	0.8	0
38	South Asian Journal of Marketing	2753-4324	2753-4332	Education Management		Emrald								1 category: Marketing	2	Quarterly	220	10.5	65	2.1101	57.9	35.2	20.4	8000	10–21	87	0	3000	Lengthy	Hybrid	12		https://www.emeraldgrouppublishing.com/journal/sajm	No	2023	2	No	Focuses on research on marketing strategy, consumer behavior, and market dynamics in the South Asian region.	0.093	0.087	0.03	0.75	0	1	1	0	0	0.903	0
447	Culture, Agriculture, Food and Environment	2153-9561	2153-9561	Economics	Social Sciences	Wiley			0.8	2	0.382	15	0.9	0	47	Semiannual	250	12		2.11019	69.8	66.4	17.5	8000		32	0	4110	Moderate		0		https://anthrosource.onlinelibrary.wiley.com/journal/21539561	No	1978	47	No	An interdisciplinary journal focusing on the cultural, social, and environmental aspects of agriculture and food systems.	0.06	0.103	0.028	0.75	0	1	0	0	0	0.988	0
2	Consumer Behavior in Tourism and Hospitality	2772-5955		Business & Management (General)		Emrald	B	Q1		5.3		10		Specialized		Bimonthly	300	15.3	58	2.11029	56	78.3	22.1	10000	10–21	55	0	3750	Moderate	Gold OA	12		https://www.emeraldgrouppublishing.com/journal/cbth	No			No	Publishes research on consumer behavior, decision-making, and experience in the tourism and hospitality sectors.	0.358	0.212	0.107	1	0.265	1	1	0	0	0.953	0.986
220	China Accounting and Finance Review	1029-2244	1573-7067	Sustainability & Environmental Management		Emrald	A					26		Specialized	12	Quarterly	300	15.4	72	2.11073	62.6	43.8	14.3	8000	14–30	70	0		Moderate	Diamond OA	0		https://www.emeraldgrouppublishing.com/journal/cafr	No	2013	12	No	Publishes research on accounting, auditing, and finance issues related to China's economy and markets.	0.198	0	0	0	0.271	1	1	0	0	0.982	0
986	Multinational Business Review	2054-1690	2054-1690	Marketing	Business, Management and Accounting	Emrald	B	Q1	2.7	5.4	1.06	36	3.81	1 category: Multinational	32	Quarterly	250	11.9		2.11259	75.2	74.8	27.3	8000		26	0		Moderate		12		https://www.emeraldgrouppublishing.com/journal/mbr	Yes	1993	32	No	Publishes scholarly research focused on international business and management, particularly multinational corporations (MNCs), strategy, and global operations.	0.369	0.546	0.373	1	0	0.905	0	1	0	0.974	0
946	Tourism and Hospitality Research	1467-3584	1740-4279	Sustainability & Environmental Management	Social Sciences	Sage	B	Q1	2.8	6.7	0.795	47	4.04	Specialized	31	Quarterly	600	23.9		2.11417	82.4	78	27.8	8000		75	13	3000	Moderate	Hybrid	0		https://journals.sagepub.com/home/thr	No	1994	31	No	Publishes research on tourism, hospitality, and leisure studies, emphasizing conceptual and methodological rigor.	0	0	0	0.5	0	1	1	0	0	0	0
668	Journal of Leadership Studies	1935-8984	1935-8992	Engineering & Technology	Social Sciences	Wiley		Q3	0.6	2	0.34	19	1.56	1 category: Leadership	32	Quarterly	300	15	62	2.11861	63	76.7	35.9	8000	10–21	9	0	3150	Moderate	Hybrid	12		https://onlinelibrary.wiley.com/journal/1935262X	No	1993	32	No	Publishes research that advances the theory and practice of leadership across organizational and societal contexts.	0.328	0	0	1	0.468	1	1	0	0	0.806	0
989	Transforming Government: People, Process and Policy	1750-6174	1750-6174	Business & Management (General)	Decision Sciences	Emrald	B		2.6	5	0.585	43	3.4	0	19	Quarterly	350	16.7		2.11921	81.6	71.6	26.7	8000		25	0	3500		Hybrid	0		https://www.emeraldgrouppublishing.com/journal/tg	No	2006	19	No	Publishes research on e-government, public sector reform, and digital transformation in governance.	0	0	0	0	0	1	1	0	0	0	0
398	Team Performance Management: An International Journal	1352-7592	1758-7133	Business & Management (General)		Emrald			2.2			43		1 category: Team	30	Quarterly	300	15	65	2.11924	74.8	70.1	19.8	8000	10–21	43	0		Moderate		12		https://www.emeraldgrouppublishing.com/journal/tpm	No	1995	30	No	Publishes research on teamwork, team dynamics, and performance management in organizational teams.	0.119	0	0	0	0.513	1	0	0	0	0.897	0.845
14	Journal of Communication Management	1478-5318	1478-5318	Business & Management (General)	Social Sciences	Emrald	B	Q1	2.1	4.5	0.781	46	3.65	2 categories: Communication + Management	29	Quarterly	400	19	60	2.12031	48.9	64.2	20.5	8000	7–14	53	0	3200	Moderate	Hybrid	0		https://www.emeraldgrouppublishing.com/journal/jcom	No	1996	29	No	Publishes research on corporate communication, internal communication, and public relations at the management level.	0.246	0.264	0.062	1	0.323	1	1	0	0	0.988	0.993
670	Asia & the Pacific Policy Studies	2050-4195	2051-7871	Accounting & Finance		Wiley		Q2	0.8		0.67			2 categories: Policy + Regional	11	Quarterly	250	12	60	2.12285	50.4	66.4	15.6	8000	7–14	24	0		Moderate		0		https://onlinelibrary.wiley.com/journal/20500480	No	2014	11	No	Focuses on research and policy analysis on public policy issues relevant to Asia and the Pacific.	0.063	0	0	0.75	0	1	0	0	0	0.885	0.831
458	International Journal of Development Issues	1446-8956	1758-5787	Economics		Emrald	C	Q2		2.1	0.29	25		1 category: Development	23	Quarterly	200	8.3	62	2.12313	55.3	45.8	24.7	8000	10–21	18	0	2500	Moderate	Hybrid	0		https://www.emeraldgrouppublishing.com/journal/ijdi	No	2002	23	No	Focuses on research on economic and social development issues in developing countries.	0.045	0.077	0.024	0.5	0	1	0	0	0	0.985	0.98
410	American Journal of Evaluation	1098-2140	1552-7583	Business & Management (General)	Psychology	Sage	C	Q1	1	3.8	0.956	63	2.23	1 category: Evaluation	25	Quarterly	450	20.5	68	2.12365	71	68.3	19.5	8000	14–28	27	49	1750	Moderate	Hybrid	0		https://journals.sagepub.com/home/aje	No	2000	25	No	Publishes research on the theory, methodology, and practice of evaluation across various fields.	0.063	0.062	0.019	0.75	0	1	0	0	0	0.826	0
244	Journal of Economic and Administrative Sciences	2008-8069	2394-9844	Business & Management (General)		Emrald	C	Q2	1.7			15		2 categories: Economics + Admin	40	Quarterly	300	14.8	68	2.12486	70.7	45.8	13.6	12000	14–28	58	0	2810	Moderate		0		https://www.emeraldgrouppublishing.com/journal/jeas	No	1985	40	No	Publishes research in economics, business administration, and related administrative sciences.	0.104	0	0	0	0.455	1	0	0	0	0.765	0
744	Journal of Public Budgeting, Accounting & Financial Management	1096-3367		Operations & Supply Chain		Emrald		Q2	2.5		0.64			0	36	Quarterly	300	14.1		2.12785	62.9	69.4	25.9	10000		31	0	2500	Moderate	Hybrid	0		https://www.emeraldgrouppublishing.com/journal/jpbafm	No	1989	36	No	Publishes research on financial management, budgeting, and accounting in the public sector and non-profit organizations.	0.134	0	0	0	0	1	0	0	0	0.979	0.973
540	Journal of Documentation	0022-0418	1758-5086	Accounting & Finance	Social Sciences	Emrald	B	Q1	2	3.9	0.836	69	2.97	1 category: Documentation	80	Quarterly	800	27.1	65	2.13011	71.3	73.3	26.4	8000	10–21	37	0		Moderate		12		https://www.emeraldgrouppublishing.com/journal/jd	No	1945	80	No	Publishes research on documentation, information science, and knowledge organization.	0.131	0.118	0.031	0	0	1	0	0	0	0.979	0
833	Journal of Commodity Markets	2405-8588	2405-8588	Business & Management (General)	Economics, Econometrics and Finance	Elsevier	A	Q1	4.5	5.1	0.737	21	4.24	1 category: Commodity	9	Quarterly	400	18		2.13369	57	80.3	23.9	8000		4	7	3600	Moderate	Hybrid	0		https://www.sciencedirect.com/journal/journal-of-commodity-markets	No	2016	9	No	Publishes research on the economics, finance, and trading of commodity markets, including energy, metals, and agricultural products.	0.101	0.175	0.057	1	0	0.952	0	1	0	0.968	0
828	International Review of Law and Economics	0144-8188	1873-5810	Education Management	Social Sciences	Elsevier	B	Q2	1	2	0.647	45	1.21	2 categories: Law + Economics	44	Quarterly	400	18		2.13369	58.3	72.3	31.7	8000		10	10	3200	Moderate	Hybrid	0		https://www.sciencedirect.com/journal/international-review-of-law-and-economics	No	1981	44	No	Focuses on research on the economic analysis of law and legal institutions.	0.194	0	0	0	0.355	1	0	0	0	0.979	0.953
839	Journal of Economics and Business	0148-6195	1873-6787	Business & Management (General)	Economics, Econometrics and Finance	Elsevier	B	Q1	3.4	4.3	0.616	55	4.25	1 category: Economics	50	Quarterly	700	25		2.13382	74	74.8	39.8	11000		3	12	3570	Moderate	Hybrid	12		https://www.sciencedirect.com/journal/journal-of-economics-and-business	No	1975	50	No	Publishes theoretical and empirical research on economics and business, covering finance, international trade, and macroeconomics.	0.034	0.05	0.013	1	0	1	1	0	0	0.982	0
298	Online Social Networks and Media	2468-6938	2662-8122	Economics		Elsevier		Q1	2.9		1.34	30		1 category: Social Networks	8	Quarterly	450	20	62	2.13573	62	69.9	25.4	8000	10–21	6	17		Moderate		0		https://www.sciencedirect.com/journal/online-social-networks-and-media	Yes	2017	8	No	Dedicated to research on the design, use, and impact of online social networks and media platforms.	0	0	0	0	0	1	0	0	0	0.847	0
237	International Journal of Organization Theory & Behavior	1093-4537	1557-0473	Business & Management (General)		Emrald						29		1 category: Org Theory	27	Quarterly	250	11.5	65	2.13597	53.8	63.6	14.2	8000	10–21	91	0	3400	Moderate	Hybrid	0		https://www.emeraldgrouppublishing.com/journal/ijotb	No	1998	27	No	Publishes research on organization theory, organizational behavior, and management.	0.075	0.156	0.051	0.75	0	1	1	0	0	0.926	0
323	Journal of Historical Research in Marketing	1755-7518	1755-7518	HRM & Organizational Behavior	Business, Management and Accounting	Emrald	B	Q3	6	0.8	0.264	19	0.58	1 category: History	16	Quarterly	300	14.3	62	2.13605	76.6	68	18.4	8000	10–21	36	0	3200	Moderate	Hybrid	0		https://www.emeraldgrouppublishing.com/journal/jhrm	No	2009	16	No	Dedicated to research that uses historical methods to study marketing phenomena, thought, and practice over time.	0.082	0	0	0	0	1	1	0	0	0.953	0.851
305	The International Journal of Management Education	1472-8176	1873-4555	Education Management		Elsevier	C	Q1	7.4	5.7		35		2 categories: Management + Education	22	Quarterly	450	20	65	2.13637	87.9	70.4	22.4	8000	10–21	0	8		Moderate		12		https://www.sciencedirect.com/journal/the-international-journal-of-management-education	No	2003	22	No	Dedicated to teaching and learning in the field of management, covering curriculum development, pedagogical methods, innovative learning technologies, and assessment.	0.108	0	0	0	0	1	0	0	0	0	0.973
371	Australian Journal of Public Administration	0313-6647	1467-8500	Economics	Social Sciences	Wiley	A	Q1	2.1	3.3	0.635	48	2.44	1 category: Public Admin	85	Quarterly	450	20	68	2.137	67	50.1	15.7	8000	14–28	9	0		Moderate		12		https://onlinelibrary.wiley.com/journal/14678500	No	1940	85	No	Publishes research on public administration, policy, and governance with a focus on Australian contexts.	0	0	0	0	0	1	1	0	0	0.997	0.98
756	Management Research: The Journal of the Iberoamerican Academy of Management	1536-5433	1747-5155	Education Management		Emrald		Q2	1.3		0.76			1 category: Management	22	Quarterly	400	18.4	65	2.13708	49.9	74.4	29.7	8000	10–21	40	0	2500	Moderate	Hybrid	0		https://www.emeraldgrouppublishing.com/journal/mrijam	No	2003	22	No	Publishes research on management and organizational studies with a focus on Iberoamerican contexts (Spain, Portugal, Latin America).	0.093	0	0	1	0	1	1	0	0	0.935	0
147	Journal of Behavioral and Experimental Finance	2214-6352		Tourism & Hospitality	Economics, Econometrics and Finance	Elsevier	A	Q1	4.7	9	1.242	31	7.35	Specialized	11	Quarterly	450	20	70	2.13743	68.3	69.1	19.7	8000	14–30	13	6	2800	Moderate	Hybrid	12		https://www.sciencedirect.com/journal/journal-of-behavioral-and-experimental-finance	Yes	2014	11	No	Publishes research that uses experimental and behavioral methods to understand financial decision-making and market anomalies.	0.052	0.082	0.022	0.75	0.568	1	1	0	0	0.891	0
403	Research in Economics	1090-9441	1090-9530	Business & Management (General)	Economics, Econometrics and Finance	Elsevier	B	Q3	1.3	1.7	0.292	31	0.68	Specialized	18	Quarterly	450	20	70	2.13743	68.6	69.9	20.5	8000	14–30	113	4	1500	Moderate	Gold OA	0		https://www.sciencedirect.com/journal/research-in-economics	No	2007	18	No	Publishes high-quality research contributions across all areas of economics, emphasizing theoretical and applied analysis.	0.075	0.089	0.02	0.75	0.474	1	1	0	0	0.935	0
192	Financial Markets and Portfolio Management	1947-6401	1947-641X	Strategy & International Business	Economics, Econometrics and Finance	Springer	B	Q3	1.8	3	0.501	25	1.97	Specialized	39	Quarterly	450	20	72	2.13785	62.2	68.1	20.1	8000	14–30	7	0	3190	Lengthy	Hybrid	0		https://link.springer.com/journal/11408	No	1986	39	No	Focuses on research in financial markets, investments, and portfolio management.	0	0	0	0	0.645	1	0	0	0	0.871	0.845
121	Journal of Vacation Marketing	1479-1870	1479-1870	Operations & Supply Chain	Business, Management and Accounting	Sage	A	Q1	5	7.7	1.135	72	7.36	1 category: Tourism Marketing	30	Quarterly	300	14.1	60	2.14061	75.1	69.6	21.4	8000	7–14	37	22	4540	Moderate	Hybrid	12		https://journals.sagepub.com/home/jvm	No	1995	30	No	Focuses on the marketing and consumer behavior related to leisure travel and vacation choices.	0.384	0	0	0	0	1	1	0	0	0	0.939
135	Sport, Business and Management: An International Journal	2042-6798	2042-6798	Business & Management (General)	Business, Management and Accounting	Emrald			1.7		0.505	23	2.24	0	14	Bimonthly	400	17.6		2.1441	69.2	70.4	18.4	8000		50	0	2500		Hybrid	12		https://www.emeraldgrouppublishing.com/journal/sbm	No	2011	14	No	Focuses on research on business, management, and economics within the sports industry.	0.104	0.139	0.065	1	0.549	1	1	0	0	0.921	0.838
662	The Electronic Journal of Information Systems in Developing Countries	1681-4835		Business & Management (General)		Wiley		Q1	1.4		0.91			2 categories: IT + Developing	25	Quarterly	250	11	50	2.14484	80	73	24.1	8000	5–10	3	0	4120	Moderate	Gold OA	12		https://onlinelibrary.wiley.com/journal/16814835	No	2000	25	No	Dedicated to research on the design, implementation, and impact of information systems in developing countries.	0.291	0.356	0.214	1	0	0.952	1	1	0	0.944	0.912
43	Environmental Pollution and Management	2572-6691		Operations & Supply Chain		Elsevier						10		2 categories: Environmental + Management		Quarterly	400	18	62	2.14692	70.1	62.7	16.1	10000	10–21	4	4	3860	Moderate		0		https://www.sciencedirect.com/journal/environmental-pollution-and-management	No			No	Covers environmental management strategies, policy, monitoring, and technologies aimed at reducing pollution and achieving sustainable development.	0.045	0	0	0	0.455	1	0	0	0	0.982	0
217	Archnet-IJAR: International Journal of Architectural Research	1938-782X	1938-7803	Engineering & Technology		Emrald		Q1	2.2		0.65	11		1 category: Architecture	18	Quarterly	300	13.8	65	2.14916	78.2	47.7	15.2	8000	10–21	29	0	2500	Moderate	Hybrid	12		https://www.emeraldgrouppublishing.com/journal/arch	No	2007	18	No	Publishes research on architecture, planning, and built environment studies.	0.131	0.163	0.32	1	0.321	1	1	0	0	0.994	0.973
482	Nankai Business Review International	2773-0435	2773-0443	Business & Management (General)	Business, Management and Accounting	Emrald		Q2	2.6	2.1	0.321	20	1.3	1 category: Business	15	Quarterly	300	13.7	68	2.15229	51.2	49.9	28.2	8000	14–28	116	0	2950	Moderate	Hybrid	12		https://www.emeraldgrouppublishing.com/journal/nbri	Yes	2010	15	No	Focuses on business, management, and economic issues relevant to a global audience, often with an Asian focus.	0.272	0.255	0.23	1	0.573	0.905	1	1	0	0.971	0.993
761	Qualitative Market Research: An International Journal	1352-2752	1758-5949	Business & Management (General)		Emrald	B	Q1	2.5		0.93			1 category: Qualitative	27	Quarterly	350	15.9	68	2.15411	48.4	72	25.2	8000	14–28	57	0	2500	Moderate	Hybrid	0		https://www.emeraldgrouppublishing.com/journal/qmr	No	1998	27	No	Focuses on the theory, methodology, and application of qualitative research in marketing.	0.052	0.048	0.021	0.75	0.538	1	1	0	0	0.768	0
311	Journal of Place Management and Development	1753-8343	1753-8343	Engineering & Technology	Business, Management and Accounting	Emrald	C	Q2	1.6	3.7	0.471	34	2.12	Specialized	17	Quarterly	350	15.8	60	2.15496	72.9	67.6	19.5	10000	7–14	38	0	3270	Moderate		0		https://www.emeraldgrouppublishing.com/journal/jpmd	No	2008	17	No	Focuses on the management, marketing, and planning of physical places (cities, towns, districts, rural areas) for economic, social, and environmental benefit.	0	0	0	0.5	0.331	1	0	0	0	0.918	0.905
450	Journal of Marketing Education	0273-4753	1552-6684	HRM & Organizational Behavior	Social Sciences	Sage	B	Q1	4.1	6.3	0.743	63	2.93	2 categories: Marketing + Education	46	Quarterly	300	13.6	70	2.15521	81.1	70.4	14.5	8000	14–30	17	28	3200	Moderate	Hybrid	0		https://journals.sagepub.com/home/jmd	No	1979	46	No	Dedicated to the improvement of marketing education, publishing research on teaching methods, curriculum development, and assessment.	0	0	0	0	0	1	1	0	0	0.785	0
96	Journal of Applied Research in Higher Education	2639-6617		Tourism & Hospitality	Social Sciences	Emrald		Q2	1.6	3.1	0.442	20	2.38	2 categories: Higher Ed + Research	16	Bimonthly	500	20.6	58	2.15541	83.8	64.8	20.1	8000	7–14	41	0	2760	Moderate	Hybrid	0		https://www.emeraldgrouppublishing.com/journal/jarihe	Yes	2009	16	No	Focuses on applied research that informs practice and policy in higher education.	0.071	0.127	0.045	0.75	0.524	0.976	1	1	0	0	0
924	Journal of Research in Innovative Teaching & Learning	2397-7604	2397-7612	Marketing		Emrald		Q3		3	0.25			2 categories: Teaching + Innovation	8	Quarterly	250	10.1		2.15575	74.9	72.3	19.7	8000		18	0		Easy	Diamond OA	0		#N/A	No	2017	8	No	Publishes research on innovative teaching methods, learning technologies, and educational assessment.	0.037	0	0	0.75	0	1	0	0	0	0.774	0
520	Journal of Financial Economic Policy	1757-6385	1757-6393	Business & Management (General)	Economics, Econometrics and Finance	Emrald	B	Q3	1.8	2	0.314	16	1.56	Specialized	11	Quarterly	300	13.5	72	2.15814	84.8	69.7	25.4	8000	14–30	45	0	3360	Moderate		0		https://www.emeraldgrouppublishing.com/journal/jfep	No	2014	11	No	Focuses on the economic analysis of financial policy, regulation, and its impact on financial markets and institutions.	0	0	0	0.75	0.553	1	1	0	0	0.859	0
999	Journal of Informetrics	1875-5879	1875-5879	Marketing	Decision Sciences	Elsevier		Q1	3.5	6.9	1.269	83	3.83	1 category: Informetrics	18	Quarterly	500	20		2.15918	64.2	75.4	42.8	8000		6	9	3200	Moderate	Hybrid	12		https://www.sciencedirect.com/journal/journal-of-informetrics	No	2007	18	No	Dedicated to the quantitative study of information and its communication, covering informetrics, bibliometrics, and citation analysis.	0.086	0	0	0	0	1	0	0	0	0.829	0
885	Utilities Policy	0957-1787	1873-6051	Engineering & Technology	Environmental Science	Elsevier		Q1	4.4	6.3	0.906	59	4.23	1 category: Utilities	34	Quarterly	500	20		2.15918	64.1	73.3	41.2	8000		0	11		Moderate		0		https://www.sciencedirect.com/journal/utilities-policy	No	1991	34	No	Focuses on the policy, regulation, and economics of utility industries (e.g., energy, water, telecommunications, and gas).	0.183	0.151	0.183	1	0	0.905	0	1	0	0.838	0.77
364	Journal of Human Values	0971-6858	0973-2075	Economics	Arts and Humanities	Sage		Q2	0.6	0.9	0.19	17	0.74	2 categories: Values + Management	30	Quarterly	250	10.5	62	2.15946	57.9	41.4	13.5	8000	10–21	0	0		Moderate		12		https://journals.sagepub.com/home/jhv	No	1995	30	No	Publishes research on the role of values, ethics, and spirituality in business, society, and public life.	0	0	0	0	0.22	1	1	0	0	0	0
939	Management Communication Quarterly	1552-6798	1552-6798	Information Systems & Digital Business	Business, Management and Accounting	Sage	B	Q1	2.4	3.9	0.937	73	3.38	1 category: Communication	38	Quarterly	350	15		2.16246	47.3	76.7	33.4	8000		24	15	2900	Moderate	Hybrid	12		https://journals.sagepub.com/home/mcq	No	1987	38	No	Focuses on research on all aspects of communication in management, organizations, and business.	0.06	0.082	0.041	1	0	1	1	0	0	0.879	0
1040	Applied Economic Perspectives and Policy	2040-579X	2040-5803	Economics	Economics, Econometrics and Finance	Wiley	B	Q1	3.4	7.8	2.051	57	8.42	Specialized	68	Quarterly	600	22.5	70	2.16814	49.3	78	41.7	8000	14–30	0	0	3370	Moderate		0		#N/A	No	1957	68	No	Focuses on applied economic analysis of public policy issues related to agriculture, food, resources, and rural development.	0.097	0	0	0.75	0.421	1	1	0	0	0	0
651	Business and Society Review	1467-8594	1467-8594	Education Management	Business, Management and Accounting	Wiley	C	Q2	1.8	1.6	0.4	26	1.75	1 category: Society	63	Quarterly	300	13	65	2.1691	62.8	69.4	28.2	8000	10–21	88	0	2900	Moderate	Hybrid	0		https://onlinelibrary.wiley.com/journal/15200546	No	1962	63	No	Publishes articles and debates on ethical, social, and political issues facing business and the global economy.	0	0	0	0	0.748	1	1	0	0	0.629	0
965	International Journal of Islamic and Middle Eastern Finance and Management	1755-4192	1755-4206	Business & Management (General)	Economics, Econometrics and Finance	Emrald	B	Q2	2.2	4.6	0.49	38	3.61	1 category: Islamic	15	Quarterly	400	16.6		2.17012	80.4	72.3	18.2	8000		57	0	3400		Hybrid	12		https://www.emeraldgrouppublishing.com/journal/iimefm	No	2010	15	No	Dedicated to research on financial and management issues compliant with Islamic principles and relevant to the Middle Eastern context.	0.03	0	0	0	0.553	1	1	0	0	0.918	0
1028	Qualitative Research in Organizations and Management: An International Journal	1746-5642	1755-6688	Business & Management (General)		Emrald		Q2	1.8		0.66			1 category: Qualitative	19	Quarterly	300	12.9	62	2.17095	75.6	78	29.6	8000	10–21	34	0	2500	Moderate	Hybrid	12		#N/A	No	2006	19	No	Dedicated to the theory, methods, and application of qualitative research in organizational and management studies.	0.257	0.356	0.099	1	0.184	1	0	0	0	0.974	0.959
173	Indian Journal of Corporate Governance	0974-9104	0974-9112	Operations & Supply Chain		Sage	C	Q3		1.6	0.17	14		1 category: Governance	17	Quarterly	200	6.3	70	2.17116	47.5	36.1	8.9	8000	14–30	0	0		Lengthy	Subscription	0		https://journals.sagepub.com/home/cgo	No	2008	17	No	Publishes research on corporate governance, ethics, and board practices with a focus on India.	0.104	0.118	0.036	0.75	0	1	0	0	0	0.935	0
1061	Current Opinion in Food Science	2214-7995		Business & Management (General)	Immunology and Microbiology	Elsevier		Q1	7.8	14.6	1.431	64	10.47	1 category: Food	10	Quarterly	500	20	65	2.17321	82.2	81.3	47.8	8000	10–21	0	0	2900	Moderate	Hybrid	0		#N/A	Yes	2015	10	No	A review journal providing specialists with unique and educational platforms to keep up to date with the expanding volume of information published in the field of food science.	0.06	0.053	0.023	0.75	0.449	1	0	0	0	0.841	0
160	Journal of Consumer Affairs	0022-0078	1745-6601	Business & Management (General)	Economics, Econometrics and Finance	Wiley	A	Q1	3.2	4.3	0.647	70	2.66	1 category: Consumer	58	Quarterly	500	20	70	2.17429	79.6	69	20.4	10000	14–30	16	0	3800	Moderate	Hybrid	0		https://onlinelibrary.wiley.com/journal/17456606	No	1967	58	No	Publishes research on consumer welfare, policy, and the economic and social issues of consumer affairs.	0.045	0.029	0.012	0.75	0.524	1	1	0	0	0.953	0.804
602	Journal of Evolutionary Economics	1432-1386	1432-1386	Information Systems & Digital Business	Business, Management and Accounting	Springer	A	Q2	1.8	3.4	0.73	79	1.76	Specialized	34	Quarterly	500	20	70	2.17429	57.1	72.7	27.4	10000	14–30	15	0	3090	Moderate	Hybrid	24		https://link.springer.com/journal/191	No	1991	34	No	Dedicated to research that uses evolutionary, institutional, and historical approaches to economic analysis.	0.056	0.156	0.091	1	0	1	0	0	0	0.806	0
659	The Financial Review	0732-2512	1755-6808	Business & Management (General)		Wiley		Q2	1.9		0.87			1 category: Finance	60	Quarterly	500	20	72	2.17472	83.7	80.6	45.2	8000	14–30	51	0	3240	Moderate	Hybrid	12		https://onlinelibrary.wiley.com/journal/15406288	No	1965	60	No	Publishes research on all areas of financial economics, including corporate finance, investments, and financial institutions.	0.045	0	0	0	0	1	1	0	0	0.609	0
138	Young Consumers: Insight and Ideas for Responsible Marketers	1747-9886	1747-9894	Tourism & Hospitality		Emrald			5			45		1 category: Youth Marketing	25	Quarterly	350	15	58	2.175	81.2	67.6	19.1	8000	7–14	39	0	3510	Moderate	Hybrid	12		https://www.emeraldgrouppublishing.com/journal/yc	No	2000	25	No	Focuses on research related to marketing to and understanding young consumers, emphasizing ethics and responsible marketing practices.	0.067	0	0	0.75	0	1	1	0	0	0	0.953
186	IIM Kozhikode Society & Management Review	2277-9752	2277-9760	Healthcare Management		Sage			1.1			15		1 category: Management	13	Quarterly	250	9.9	70	2.17567	61.1	39.3	12.1	8000	14–30	0	0		Lengthy		0	Seal	https://journals.sagepub.com/home/ksm	Yes	2012	13	No	Publishes research on management, business, and societal issues with a focus on Indian and emerging market contexts.	0	0	0	0.75	0	1	0	0	0	0.903	0.831
898	Invention Disclosure		2772-4441	Business & Management (General)		Elsevier								1 category: Invention		Quarterly	150			2.17609	84.3	68.7	16.4	8000		0	2						Manual search needed	Yes			No	A formal document or process, likely covers the legal and procedural aspects of documenting and protecting intellectual property (inventions) within a corporation or university.	0.06	0.031	0.017	0.75	0	0.976	0	1	0	0.744	0
893	Versicherungsmagazin	2198-4679	2198-4687	Business & Management (General)		Springer								1 category: Insurance (German)	50	Quarterly	150			2.17609	84.9	75.1	22.5	8000		0	0						https://www.versicherungsmagazin.de	Yes	1975	50	No	A German term for Insurance Magazine, focusing on industry news, trends, and business issues in insurance.	0.119	0.197	0.112	1	0.447	1	0	0	0	0.979	0.939
931	Thyroid Science	2372-1327		Business & Management (General)		Elsevier								1 category: Thyroid		Quarterly	150			2.17609	67.6	22.8	16.3	9000		0	0						#N/A	No			No	Specialized journal for research and clinical advancements in thyroid biology, diseases, diagnosis, and treatment.	0	0	0	0	0	1	0	0	0	0.812	0
580	Environment, Development and Sustainability	1387-585X	1573-2979	Sustainability & Environmental Management	Social Sciences	Springer			4.2	7.2	0.835	72	5.6	0	26	Monthly	800	25		2.17732	45.8	74.1	22.1	10000		27	0	2660	Moderate	Hybrid	12		https://link.springer.com/journal/10668	No	1999	26	No	Focuses on research on the complex interactions between environment, development, and sustainability at global and local levels.	0.168	0	0	0	0	1	1	0	0	0.979	0
336	Quantitative Marketing and Economics	1570-7156	1572-8870	Education Management	Economics, Econometrics and Finance	Springer	A	Q1	1.1	1.8	1.437	37	1.42	Specialized	22	Quarterly	350	15	75	2.17868	82	71.6	23.9	8000	21–45	22	0	3940	Lengthy	Hybrid	24		https://link.springer.com/journal/11129	No	2003	22	No	Dedicated to research that uses quantitative models and rigorous empirical analysis to address marketing and economic issues.	0.198	0	0.067	1	0	0.952	1	1	0	0.95	0
645	Financial Markets, Institutions & Instruments	0963-8008	1573-0593	Business & Management (General)		Wiley								0	33	Semiannual	300	12		2.17987	75.7	70.4	19.7	8000		53	0	3040	Moderate	Hybrid	0		https://onlinelibrary.wiley.com/journal/14680432	No	1992	33	No	Focuses on high-quality theoretical and empirical research on financial markets, institutions, and the instruments traded within them.	0.254	0.019	0.005	0.5	0.397	1	0	0	0	0.829	0
1005	Journal of Decision Systems	1246-0125	2116-7056	Information Systems & Digital Business	Social Sciences	T&F	B	Q1	4.3	3.4	0.593	28	3.4	1 category: Decision	33	Quarterly	300	12		2.17987	53.2	74.8	30.2	8000		7	21				12		https://www.tandfonline.com/journals/tjds20	No	1992	33	No	Focuses on the design, development, and use of decision support systems and tools in business and management.	0	0	0	0.25	0	1	1	0	0	0	0
363	Evaluation Review	0193-841X	1552-6846	Accounting & Finance	Arts and Humanities	Sage	A	Q1	3.7	2.7	0.408	59	1.14	1 category: Evaluation	48	Quarterly	400	16.7	65	2.1816	63.2	68	17.9	8000	10–21	37	23		Moderate		12		https://journals.sagepub.com/home/erx	No	1977	48	No	Publishes research on the methods and applications of program and policy evaluation in government, non-profit, and social sectors.	0	0	0	0	0.496	1	1	0	0	1	0
592	Journal of Business Economics	0007-7496	1863-7151	Business & Management (General)		Springer		Q2		4.5	0.45	38		Specialized	101	Quarterly	600	22	68	2.18169	50.9	71.6	31.9	8000	14–28	10	0	3090	Moderate	Hybrid	12		https://link.springer.com/journal/11573	No	1924	101	No	Publishes research on business economics, management, and related economic issues.	0.067	0	0	0.75	0.524	1	1	0	0	0	0
907	Digital Transformation and Society	2631-309X	2631-3103	Business & Management (General)		Emrald		Q2		4.4	0.35			2 categories: Digital + Society	6	Quarterly	250	9		2.18213	79.2	45.8	27.8	8000		28	0	5120	Easy		0		#N/A	Yes	2019	6	No	Publishes research on the societal, organizational, and policy implications of digital transformation.	0.108	0.125	0.04	1	0	1	1	0	0	0.847	0
414	Sociological Methodology	0081-1750	1467-9531	Business & Management (General)	Social Sciences	Sage	A	Q1	4.7	6.2	1.996	61	2.79	1 category: Methodology	56	Quarterly	300	12.5	75	2.18374	79.9	72.7	22.4	8000	21–45	0	0	3900	Lengthy	Hybrid	12		https://journals.sagepub.com/home/smx	No	1969	56	No	A premier journal dedicated to the advancement of research methods in sociology and related social sciences, covering statistical and qualitative techniques.	0.075	0.103	0.023	0.75	0.513	1	1	0	0	0.835	0
428	Digital Policy, Regulation and Governance	2398-5046	2398-3331	Business & Management (General)	Decision Sciences	Emrald	B		2.7	4.3	0.469	35	2.06	0	8	Quarterly	400	15.9		2.18833	50.7	69.7	16.9	No limit		34	0	2900	Easy	Hybrid	12		https://www.emeraldgrouppublishing.com/journal/dprg	No	2017	8	No	Focuses on research on the policy, legal, and governance challenges of digital technologies and the internet.	0.571	0	0	0	0	1	1	0	0	0.988	0.919
94	Journal of Corporate Accounting & Finance	1085-7826	1520-748X	Business & Management (General)		Wiley			1.2			22		1 category: Corporate Finance	36	Quarterly	450	18	62	2.18912	67	64.3	13.5	8000	10–21	15	0	3940	Moderate	Hybrid	12		https://onlinelibrary.wiley.com/journal/10970053	No	1989	36	No	Focuses on research on corporate accounting, financial reporting, and financial strategy.	0	0	0	0	0	1	1	0	0	0.997	0.98
500	Naval Research Logistics	1520-6750	1520-6750	Business & Management (General)	Decision Sciences	Wiley	B	Q1	2.1	3	0.961	73	2.86	1 category: Logistics	71	Quarterly	450	18	70	2.19086	81	73.3	25.7	8000	14–30	18	0		Lengthy		12		https://onlinelibrary.wiley.com/journal/15206750	No	1954	71	No	Focuses on research on logistics, operations research, and management science with applications in defense and complex systems.	0.007	0	0	0	0.917	1	1	0	0	0.956	0
930	Journal of Capital Markets Studies	2752-7188	2752-7196	Business & Management (General)		Emrald		Q2		2.1	0.1			1 category: Capital	4	Quarterly	300	11.5		2.19225	73.2	68.3	18.9	8000		49	0		Easy		12		#N/A	No	2021	4	No	Focuses on research on capital markets, financial institutions, and investment issues.	0.06	0	0	0.5	0	1	0	0	0	0.888	0
504	South Asian Journal of Human Resources Management	2349-5792	2349-5792	Entrepreneurship & Innovation	Business, Management and Accounting	Sage	C	Q3	1.4	2.2	0.351	12	1.67	1 category: HR	11	Quarterly	250	9	65	2.19631	45.3	42.4	22.9	8000	10–21	0	0	3000	Moderate	Hybrid	12		https://us.sagepub.com/en-us/nam/journal/south-asian-journal-human-resources-management	Yes	2014	11	No	Publishes research on Human Resources Management (HRM), industrial relations, and organizational behavior in the South Asian context.	0.034	0.06	0.021	0.5	0	1	0	0	0	0.735	0
178	FIIB Business Review	2455-2340	2455-2359	Accounting & Finance		Sage	C	Q2	2.8			16		1 category: Business	13	Quarterly	180	3.2	66	2.19751	45.1	37.3	9.6	8000	14–30	0	0	3160	Lengthy	Diamond OA	0		https://journals.sagepub.com/home/fib	Yes	2012	13	No	A journal focusing on management, business, and economic issues with a particular emphasis on the Indian and South Asian context.	0.06	0	0	1	0	1	1	0	0	0	0.905
159	Journal of Information Technology Case and Application Research	1522-8053	2329-8481	Sustainability & Environmental Management		T&F	C	Q2		2.1	0.25	22		2 categories: IT + Case Studies	26	Quarterly	200	5	58	2.19866	82.2	63.7	11.7	8000	7–14	61	0	3550	Moderate		0		https://www.tandfonline.com/journals/utca20	No	1999	26	No	Publishes field-based teaching cases and application research that demonstrate the real-world use and challenges of information technology.	0.478	0.392	0.182	1	0	1	0	0	0	0.974	0.953
390	Journal of Business-to-Business Marketing	1540-0714	1540-0714	Economics	Business, Management and Accounting	T&F	B	Q2	2.5	4.3	0.519	34	1.35	1 category: B2B	31	Quarterly	400	16	68	2.20059	68.5	69.1	27.5	8000	14–28	29	0	3520	Moderate	Hybrid	0		https://www.tandfonline.com/journals/wbbm20	No	1994	31	No	Dedicated to research on marketing and consumer behavior in business-to-business (B2B) markets.	0.235	0.252	0.083	1	0	1	1	0	0	0.976	0.98
922	EconomiA	1517-7580	1679-5674	Information Systems & Digital Business		Emrald	C	Q3		2.5	0.32			1 category: Economics	25	Quarterly	300	11		2.20464	69.6	70.1	24.3	8000		102	0	2800	Easy	Gold OA	0		#N/A	No	2000	25	No	A journal from the Latin American and Caribbean Economic Association, publishing research on economics relevant to the region.	0	0	0	0	0	1	1	0	0	0.776	0.865
476	African Journal of Science, Technology, Innovation and Development	2042-1334	2042-1342	Entrepreneurship & Innovation	Computer Science	T&F			1.2	2	0.305	19	1.58	0	16	Quarterly	300	11		2.20464	60.8	42.3	10.2	12000		23	58		Moderate	Subscription	12		https://www.tandfonline.com/journals/rajs20	No	2009	16	No	Focuses on research on science, technology, innovation, and their role in economic and social development in Africa.	0.086	0.048	0.015	0.75	0	1	0	0	0	0.826	0
62	Health Care Management Science	1386-9620	1572-9389	Business & Management (General)	Health Professions	Springer	B	Q1	2	7.3	0.954	63	4.15	2 categories: Health + Management	27	Quarterly	550	20	70	2.20764	78.3	68.1	19.7	8000	14–30	12	0	3890	Lengthy	Hybrid	12		https://link.springer.com/journal/10729	No	1998	27	No	Publishes research using management science and operations research methods to address problems in health care management.	0	0	0	0	0	1	0	0	0	0	0
696	Disaster Prevention and Management: An International Journal	0965-3562	1758-5779	Sustainability & Environmental Management		Emrald		Q1	2	2.9	0.96			2 category: Policy & Law	33	Quarterly	400	15.7	65	2.20779	45.6	68	14.8	8000	10–21	36	0	2500	Moderate	Hybrid	0		https://www.emeraldgrouppublishing.com/journal/dpm	Yes	1992	33	No	Focuses on research on disaster management, risk reduction, preparedness, and recovery.	0.187	0.113	0.052	1	0.207	1	0	0	0	0.982	0
399	Magazine of Concrete Research	0024-9831	1758-9443	Education Management	Engineering	Emrald		Q2	1.6	5	0.761	69	2.58	1 category: Concrete	78	Quarterly	600	21	68	2.20966	77.5	67.6	17.4	9000	14–28	75	0		Moderate		12		https://www.icevirtuallibrary.com/journal/jmacr	No	1947	78	No	Publishes research on the materials science, properties, and applications of concrete.	0.022	0.041	0.016	0	0.543	1	0	1	0	0.909	0
882	Transport	1751-2690	1751-2704	Business & Management (General)	Engineering	Emrald		Q2	1.2	3.4	0.352	38	1.77	1 category: Transport	49	Quarterly	900	25		2.21568	45.2	80.6	35.1	8000		52	0		Moderate		0		https://www.sciencedirect.com/journal/transport	No	1976	49	No	A general scope covers research on transportation systems, planning, economics, and policy.	0.052	0.113	0.039	0.75	0	1	1	0	0	0.782	0
451	Journal of Mixed Methods Research	1558-6901	1558-6901	Business & Management (General)	Decision Sciences	Sage		Q1	7.8	11.3	1.736	59	4.18	1 category: Mixed Methods	18	Quarterly	450	17	72	2.21802	57.4	72	23.2	8000	14–30	45	15	3500	Moderate	Hybrid	0		https://journals.sagepub.com/home/mmr	No	2007	18	No	The premier forum for theoretical, methodological, and empirical research on mixed methods research—the combination of qualitative and quantitative approaches.	0.075	0	0	0	0.519	1	0	0	0	0.912	0.878
189	Vision: The Journal of Business Perspective	0972-2629	2321-0309	Economics		Sage			3.1			29		1 category: Business	28	Quarterly	400	15.3	68	2.21893	81.1	36.9	9.8	8000	14–28	0	0		Lengthy		12		https://journals.sagepub.com/home/vis	No	1997	28	No	Focuses on business vision, strategy, and management from an Indian and Asian perspective.	0.246	0.245	0.093	1	0.737	1	1	0	0	0.826	0
412	Journal of General Management	1475-955X	1475-955X	Education Management	Business, Management and Accounting	Sage	B	Q3	1.3	1.9	0.346	23	2.14	1 category: Management	50	Quarterly	250	7.9	60	2.22175	60.2	66.1	17.9	10000	7–14	44	38	3000	Moderate	Hybrid	0		https://journals.sagepub.com/home/gem	No	1975	50	No	A practice-oriented journal focusing on general management, strategy, and business trends.	0.175	0	0	1	0.746	1	1	0	0	0.956	0.993
881	The Quarterly Review of Economics and Finance	1062-9769	1878-4259	Engineering & Technology		Elsevier		Q1	3.1		0.98			1 category: Quarterly	84	Quarterly	600	20		2.22252	49	72.7	32.4	8000		0	6	2800	Moderate	Hybrid	0		https://www.sciencedirect.com/journal/the-quarterly-review-of-economics-and-finance	No	1941	84	No	Publishes research that addresses the intersection of economics and finance, including financial institutions and markets.	0.03	0	0	0	0.481	1	1	0	0	0.821	0.662
703	English Teaching: Practice & Critique	1177-8710		Business & Management (General)		Emrald		Q1	1.2		0.88			1 category: English	23	Quarterly	300	10.7	60	2.22534	70.3	70.1	21.8	8000	7–14	31	0	3870	Moderate	Hybrid	0		https://www.emeraldgrouppublishing.com/journal/etpc	No	2002	23	No	Focuses on research and critical analysis of English language teaching, pedagogy, and curriculum.	0.09	0.221	0.063	1	0.312	1	1	0	0	0.924	0.865
425	Statistica Neerlandica	1467-9574	1467-9574	Operations & Supply Chain	Decision Sciences	Wiley	A	Q2	0.8	2.1	0.567	40	1.4	1 category: Statistics	78	Quarterly	350	13	65	2.22773	51.8	69.4	20.4	8000	10–21	11	0	2160	Moderate	Hybrid	0		https://onlinelibrary.wiley.com/journal/14679585	No	1947	78	No	Publishes research on statistical theory and methodology from the Netherlands Statistical Society.	0	0	0	0	0	1	1	0	0	0	0
793	The Geneva Papers on Risk and Insurance - Issues and Practice	0378-570X	1468-0440	Education Management		Springer	B	Q1	3.3		1.23			1 category: Insurance	49	Quarterly	500	18	70	2.22865	64.4	73	27.9	8000	14–30	42	0	3000	Moderate	Hybrid	12		https://www.palgrave.com/gp/journal/41288	No	1976	49	No	Focuses on research on risk management, insurance economics, and social security issues.	0.187	0.233	0.269	1	0	0.905	0	0	0	0.865	0.818
877	The Journal of Strategic Information Systems	0963-8687	1873-0002	HRM & Organizational Behavior		Elsevier		Q1	11.8	8.3		129		1 category: Strategic IT	34	Quarterly	300	10		2.22941	68.5	56.1	25.9	8000		4	12	3900	Lengthy	Hybrid	12		https://www.sciencedirect.com/journal/the-journal-of-strategic-information-systems	Yes	1991	34	No	Publishes papers on the strategic role of information systems in organizations, focusing on the development and use of IS to achieve business goals.	0	0.043	0.006	0.5	0	1	1	0	0	0	0
272	Sensor Review	0260-2288	1758-618X	Business & Management (General)	Engineering	Emrald		Q3	1.4	3.7	0.312	44	2.01	1 category: Sensors	44	Quarterly	300	10.4	58	2.23237	59.8	65.4	16.2	8000	7–14	11	0	3200	Moderate	Hybrid	0		https://www.emeraldgrouppublishing.com/journal/sr	Yes	1981	44	No	Focuses on research, technology, and applications of sensors, measurement devices, and sensor systems.	0.049	0	0	0.5	0	1	0	0	0	0.926	0.703
940	Management Learning	1461-7307	1461-7307	Economics	Decision Sciences	Sage	A	Q1	3	5.7	1.574	84	4.01	2 categories: Management + Learning	55	Quarterly	400	14.2		2.23257	77.3	73.3	30.1	8000		33	38	3200		Hybrid	0		https://journals.sagepub.com/home/mlq	No	1970	55	No	A premier journal focusing on the theory and practice of learning, development, and change within organizations and management.	0.142	0.094	0.028	0	0	1	0	0	0	0.897	0
66	International Entrepreneurship and Management Journal	1555-1938	1555-1938	Business & Management (General)	Business, Management and Accounting	Springer	C	Q1	3.9	11.5	1.524	71	7.03	2 categories: Entrepreneurship + Management	20	Quarterly	700	22	70	2.23471	75.4	72.2	26.4	11000	14–30	7	0	3090	Lengthy	Hybrid	12		https://link.springer.com/journal/11365	No	2005	20	No	Publishes research on entrepreneurship and management in the international and cross-border context.	0.063	0.065	0.013	0.75	0	1	1	0	0	0.85	0
27	Journal of International Logistics and Trade	2752-7285	2752-7293	Business & Management (General)		Emrald		Q2		2.7	0.24	9		1 category: Logistics	13	Quarterly	300	10.3	58	2.23487	69.4	43.7	23.5	8000	7–14	25	0	4360	Moderate	Diamond OA	0		https://www.emeraldgrouppublishing.com/journal/jilt	No	2012	13	No	Publishes research on logistics, supply chain management, and trade facilitation in international contexts.	0.037	0.079	0.029	0.75	0	1	1	0	0	0.988	0.885
161	International Journal of Gender and Entrepreneurship	1756-6264	1756-6272	Business & Management (General)	Social Sciences	Emrald	C	Q1	3.4	6.2	0.778	38	5.23	2 categories: Gender + Entrepreneurship	16	Quarterly	300	10.3	62	2.23575	55.7	65.6	16.9	8000	10–21	50	0	4180	Moderate	Hybrid	0		https://www.emeraldgrouppublishing.com/journal/ijge	No	2009	16	No	Publishes research focused on gender and its impact on entrepreneurship, small business, and economic development.	0.075	0.082	0.048	1	0	1	0	0	0	0.985	0.912
1015	Business Horizons	1873-6068	1873-6068	Operations & Supply Chain	Business, Management and Accounting	Elsevier	B	Q1	7.6	18	2.475	106	8.48	1 category: Business	68	Bimonthly	600	20	65	2.23697	61.7	80.3	38.5	8000	10–21	0	0	2500	Moderate	Hybrid	12		#N/A	No	1957	68	No	A practical journal focusing on management issues, strategy, and business trends, aiming to bridge the gap between academic research and managerial practice.	0.216	0.118	0.098	1	0	1	1	0	0	0.903	0
299	Research in Transportation Business & Management	2210-5398	2210-5398	Business & Management (General)		Elsevier	C		4.4			45		2 categories: Transport + Business	13	Quarterly	600	20	65	2.23697	58.2	71.6	26.9	10000	10–21	15	10		Moderate		12		https://www.sciencedirect.com/journal/research-in-transportation-business-and-management	No	2012	13	No	Publishes research on managerial, business, and economic issues related to transportation and logistics.	0.09	0.099	0.026	0.75	0	1	1	0	0	0.724	0
427	Suicide and Life-Threatening Behavior	0363-0234	1943-2786	Public Administration & Policy	Psychology	Wiley		Q1	2.6	6.1	0.769	103	3.22	1 category: Suicide	54	Quarterly	600	20	70	2.23808	54.6	73	15.3	8000	14–30	24	0	3770	Moderate	Hybrid	0		https://onlinelibrary.wiley.com/journal/1943278X	No	1971	54	No	Publishes research on suicide, self-harm, and life-threatening behavior, covering prevention, intervention, and policy.	0.09	0.048	0.007	0.5	0	1	1	0	0	0.962	0
1025	California Management Review	2162-8564	2162-8561	Business & Management (General)	Business, Management and Accounting	Sage	A	Q1	7.3	21.6	4.17	147	11.14	1 category: Management	67	Quarterly	600	20	70	2.23808	70.7	81.3	45.1	8000	14–30	0	43		Moderate	Subscription	0		#N/A	Yes	1958	67	No	Bridges communication between academia and management practice by publishing leading-edge research with managerial applications across all management subjects.	0.067	0	0	0	0.38	1	0	0	0	0.95	0
583	The Journal of Technology Transfer	0892-9912	1573-7040	Business & Management (General)		Springer			4.3			86		1 category: Transfer	48	Quarterly	600	20	75	2.23919	78.8	74.4	17.3	8000	21–45	5	0	3790	Moderate	Hybrid	12		https://link.springer.com/journal/10961	No	1977	48	No	Publishes research on the process and policy of technology transfer and commercialization between research institutions and industry.	0.108	0	0	0	0.186	1	0	0	0	0	0
205	Industrial Relations Journal	0019-8692	1468-2335	HRM & Organizational Behavior		Wiley	A	Q2	1.5		0.68	10		1 category: Industrial Relations	55	Quarterly	450	16	65	2.24319	52.8	66.4	20.9	10000	10–21	10	0	3500	Moderate	Hybrid	0		https://onlinelibrary.wiley.com/journal/14682338	No	1970	55	No	Publishes research on industrial relations, employment relations, and labor policy with a UK and international focus.	0	0	0	0	0	1	0	0	0	0.921	0.865
126	Higher Education Quarterly	0951-5224	1468-2270	Operations & Supply Chain	Social Sciences	Wiley	C	Q1	2.3	4.3	0.768	46	2.18	1 category: Higher Ed	78	Quarterly	450	16	65	2.24319	80.2	65.1	15.7	8000	10–21	6	0	2900	Moderate	Hybrid	0		https://onlinelibrary.wiley.com/journal/14682273	Yes	1947	78	No	Focuses on research on policy, governance, finance, and professional practice in higher education.	0.257	0.132	0.043	1	0.447	1	0	0	0	0.991	0.993
535	Journal of Trust Research	2151-559X	2151-559X	Economics	Business, Management and Accounting	T&F	B	Q1	3.5	4.1	0.39	22	1.18	1 category: Trust	14	Quarterly	300	10	68	2.24457	59.1	67.6	19.7	8000	14–28	107	0	4100	Moderate	Hybrid	12		https://www.tandfonline.com/journals/rjtr20	No	2011	14	No	Dedicated to research on trust and related concepts (e.g., integrity, transparency) in organizational, social, and technological contexts.	0.291	0.043	0.014	1	0	1	1	0	0	0.679	0
685	Accounting Research Journal	1030-961X	2056-3019	HRM & Organizational Behavior	Economics, Econometrics and Finance	Emrald	B	Q2	2.1	3.2	0.409	23	2.95	1 category: Accounting	56	Quarterly	300	10	68	2.24457	81.2	51.7	15.9	9000	14–28	47	0	3200	Moderate	Hybrid	0		https://www.emeraldgrouppublishing.com/journal/arj	No	1969	56	No	Publishes research on accounting and financial reporting, with a strong emphasis on the Australian context.	0.149	0.113	0.034	1	0.429	1	1	0	0	0.994	0
18	New England Journal of Entrepreneurship	2575-5207	2575-5215	Business & Management (General)		Emrald	C	Q2		2.3	0.12	21		1 category: Entrepreneurship	20	Semiannual	250	6.8	55	2.24717	67.1	61.8	12.6	8000	7–21	27	0	3400	Moderate	Hybrid	0		https://www.emeraldgrouppublishing.com/journal/neje	No	2005	20	No	Publishes research on entrepreneurship, small business, and regional economic development with a focus on the New England region.	0.067	0	0	0	0	1	0	0	0	0.965	0.98
175	Entrepreneurship Education and Pedagogy	2515-1274		Marketing		Sage		Q2		3.4	0.4	22		2 categories: Entrepreneurship + Education	8	Quarterly	400	14.1	62	2.24903	69.2	64	15.3	8000	10–21	34	27	3000	Moderate	Hybrid	12		https://journals.sagepub.com/home/eex	No	2017	8	No	Focuses on research on the teaching, curriculum, and pedagogy of entrepreneurship education.	0	0	0	0	0	1	0	0	0	0.879	0
226	Engineering, Construction and Architectural Management	1365-232X	1365-232X	Marketing	Business, Management and Accounting	Emrald	A		3.9	7	0.927	68	5.7	0	31	Bimonthly	800	22.5		2.24989	47.6	72.6	25.3	12000		65	0	3200	Moderate	Hybrid	12		https://www.emeraldgrouppublishing.com/journal/ecam	No	1994	31	No	Publishes research on the management of complex projects in the engineering, construction, and architectural industries.	0	0	0	0	0	1	1	0	0	0.991	0
430	Higher Education, Skills and Work-based Learning	2042-3892	2042-3906	Business & Management (General)	Social Sciences	Emrald	C		1.8	3.2	0.439	20	2.19	0	14	Quarterly	500	16.6		2.25094	45.4	69.1	13.8	8000		30	0		Easy		12	Seal	https://www.emeraldgrouppublishing.com/journal/heswbl	No	2011	14	No	Focuses on research on the role of higher education and skills development in the context of work-based learning.	0.078	0	0	0	0	1	1	0	0	0.926	0
19	Asia Pacific Journal of Innovation and Entrepreneurship	2049-1069		Entrepreneurship & Innovation		Emrald			3.8			25		2 categories: Innovation + Regional	18	Quarterly	300	9.6	60	2.25275	64.8	38.9	10.3	8000	10–21	51	0	2470	Moderate	Hybrid	0		https://www.emeraldgrouppublishing.com/journal/apjie	No	2007	18	No	Focuses on innovation, entrepreneurship, and technology management research specific to the Asia Pacific region.	0.153	0.087	0.021	0.75	0.553	1	1	0	0	0.997	0
117	Asian Journal of Management Cases	0973-2616	0973-2616	Business & Management (General)	Business, Management and Accounting	Sage	C	Q4	0.2	0.3	0.117	8	0.22	1 category: Case Studies	21	Quarterly	250	6.7	70	2.25294	87.6	38.9	14.1	12000	14–30	0	0	4290	Lengthy	Hybrid	0		https://journals.sagepub.com/home/ajc	No	2004	21	No	Publishes teaching cases focused on management, strategy, and business issues relevant to the Asian region.	0.086	0.055	0.054	1	0	0.952	0	1	0	0	0
468	Journal of Management Development	0262-1711	1758-750X	Business & Management (General)	Arts and Humanities	Emrald	C	Q1	3.1	5.5	0.778	69	4.24	1 category: Development	43	Quarterly	400	14	68	2.25299	86	70.1	18.1	8000	14–28	53	0	3400	Moderate	Hybrid	0		https://www.emeraldgrouppublishing.com/journal/jmd	No	1982	43	No	Publishes research on management development, organizational learning, and executive education.	0.116	0	0	0	0	1	1	0	0	0.962	0.858
370	Strategic Change	1086-1718	1099-1697	Accounting & Finance	Economics, Econometrics and Finance	Wiley		Q1	4	3.7	0.58	25	3.24	1 category: Change	33	Quarterly	500	17	62	2.25403	75.4	68.3	18.3	8000	10–21	18	0	3460	Moderate	Hybrid	0		https://onlinelibrary.wiley.com/journal/1099162X	No	1992	33	No	Focuses on the management of strategic change, transformation, and innovation in organizations and industries.	0	0	0	0.75	0	1	1	0	0	0.924	0
970	International Journal of Pervasive Computing and Communications	1742-9901	1742-991X	Business & Management (General)	Computer Science	Emrald		Q3	8	5.1	0.4	21	3.63	1 category: Pervasive	20	Quarterly	300	9		2.25418	54.4	74.4	32.4	8000		26	0	3760		Hybrid	0		https://www.emeraldgrouppublishing.com/journal/ijpcc	No	2005	20	No	Covers research on pervasive computing, ubiquitous computing, and ambient intelligence, emphasizing the integration of IT into everyday environments.	0	0.07	0.015	0.5	0	1	0	0	0	0	0
887	International Studies of Management & Organization	0020-8825	1941-5582	Business & Management (General)		T&F	B	Q2	2.1		0.74			1 category: Studies	54	Quarterly	300	9		2.25418	70.8	77.1	36.7	8000		29	19	3200		Hybrid	12		https://www.tandfonline.com/journals/mimo20	No	1971	54	No	Publishes research on management and organization studies from a comparative and international perspective, often through special issues.	0	0	0	0	0	1	1	0	0	0.868	0
413	Qualitative Inquiry	1552-7565	1552-7565	HRM & Organizational Behavior	Social Sciences	Sage		Q1	1.8	3.7	1.059	95	2.44	1 category: Qualitative	30	Quarterly	600	19.4	70	2.25486	73.7	72	25.7	8000	14–30	14	31	3000	Moderate	Hybrid	0		https://journals.sagepub.com/home/qix	No	1995	30	No	A premier journal dedicated to the methodology, theory, and practice of qualitative inquiry in social sciences.	0.067	0.108	0.063	1	0	0.976	0	0	0	0.947	0.858
895	Risk Sciences		2950-6298	HRM & Organizational Behavior		Elsevier						8		1 category: Risk		Quarterly	180			2.25527	83.5	70.4	11.6	8000		7	7		Easy				Manual search needed	Yes			No	Likely covers the theory, assessment, management, and communication of risk in various contexts (financial, environmental, health, technology).	0.131	0.151	0.048	0.75	0	1	1	0	0	0.862	0
918	Open House International: Sustainable & Smart Architecture and Urban Studies	0168-2601	2048-8468	Entrepreneurship & Innovation		Emrald		Q3	1.6		0.51			2 categories: Architecture + Sustainability	50	Quarterly	300	8.9		2.25666	61.2	77.4	30.8	8000		41	0	3500		Hybrid	12		#N/A	No	1975	50	No	Focuses on research on sustainable architecture, smart urban planning, and housing design.	0.425	0.296	0.165	1	0.66	1	1	0	0	0.888	0
565	Journal of Public Policy & Marketing	0743-9156	1547-720X	Marketing		Sage			4.7			75		2 categories: Policy + Marketing	43	Quarterly	350	12	82	2.25714	64.5	75.4	15.3	8000	30–60	26	42	1025	Lengthy	Hybrid	0		https://journals.sagepub.com/home/ppm	No	1982	43	No	Publishes research on the interface between marketing and public policy, addressing issues like consumer protection, social marketing, and regulation.	0.146	0.089	0.037	1	0	1	0	0	0	0.868	0
22	Innovation & Management Review	2515-8969	2515-8977	Accounting & Finance		Emrald			3.4			21		2 categories: Innovation + Management	21	Quarterly	350	11.7	52	2.25809	54.3	39.2	16.4	8000	7–14	130	0	3410	Moderate		0		https://www.emeraldgrouppublishing.com/journal/inmr	No	2004	21	No	Focuses on research on innovation management, technology adoption, and organizational strategy with a managerial focus.	0.063	0.065	0.027	0.75	0	1	1	0	0	0.824	0
262	Journal of Work-Applied Management	2105-0275		Education Management		Emrald		Q1	2.7			21		1 category: Work	10	Quarterly	400	13.7	58	2.2586	83.6	66.4	17.4	8000	7–14	23	0		Moderate	Diamond OA	0		https://www.emeraldgrouppublishing.com/journal/jwam	No	2015	10	No	Focuses on research that links management theory with work-based learning and practical application in organizations.	0.119	0.255	0.303	1	0	1	1	0	0	0.988	0.872
697	Equality, Diversity and Inclusion: An International Journal	2040-7148	2040-7156	Education Management		Emrald		Q1	2.2		1.07			0	18	Bimonthly	700	20.6		2.25901	58.8	71.6	20.8	8000		74	0	3500		Hybrid	0		https://www.emeraldgrouppublishing.com/journal/edi	No	2007	18	No	Focuses on research regarding equality, diversity, and inclusion in the workplace and organizational settings.	0.052	0.111	0.047	1	0.397	1	1	0	0	0.821	0.736
455	European Business Review	0955-534X		Sustainability & Environmental Management	Business, Management and Accounting	Emrald	B	Q1	3.7	26.5	3.667	51	4.91	1 category: Business	36	Quarterly	300	9.2	60	2.26272	50.3	70.1	15.3	8000	7–14	35	0	3200	Moderate	Hybrid	12		https://www.emeraldgrouppublishing.com/journal/ebr	No	1989	36	No	Publishes articles on management, business strategy, and leadership with a focus on issues relevant to the European context and global business.	0.041	0.087	0.048	1	0	1	1	0	0	0.991	0
936	Journal of Management Inquiry	1552-6542	1552-6641	Sustainability & Environmental Management	Business, Management and Accounting	Sage	A	Q1	3.8	6.6	2.043	72	3.76	1 category: Inquiry	33	Quarterly	400	12.9		2.26639	82.5	65	31.5	8000		36	0	3000	Moderate	Hybrid	0		https://journals.sagepub.com/home/jmi	No	1992	33	No	A journal for publishing challenging, non-traditional, and reflective research on management and organizational phenomena.	0.269	0	0	0	0.299	1	0	0	0	0.974	0.932
69	Journal of Management and Governance	1572-963X	1572-963X	Public Administration & Policy	Business, Management and Accounting	Springer	C	Q1	4	4.7	0.587	57	2.98	2 categories: Management + Governance	28	Quarterly	450	15	65	2.26989	84.5	68.4	18.6	8000	10–21	39	0	3990	Moderate	Hybrid	12		https://link.springer.com/journal/10997	No	1997	28	No	Publishes research on the corporate governance of organizations and its implications for management and performance.	0.078	0.115	0.03	0.75	0.316	1	0	0	0	0.988	0
23	Journal of Business and Socio-economic Development	2752-7161	2752-717X	Business & Management (General)		Emrald		Q2		2.4		6		2 categories: Business + Development	4	Quarterly	280	7.8	62	2.27027	56.1	41.8	19.2	8000	10–21	40	0	2500	Moderate	Hybrid	0		https://www.emeraldgrouppublishing.com/journal/jbsed	No	2021	4	No	Publishes research on business and management issues linked to socio-economic development and sustainability.	0.056	0.048	0.017	1	0.269	1	1	0	0	0.868	0
483	Marketing Theory	1741-301X	1741-301X	Operations & Supply Chain	Business, Management and Accounting	Sage	A	Q1	2.8	6.2	1.693	77	4.23	1 category: Theory	24	Quarterly	500	16.5	75	2.27054	49	73.3	17.9	8000	21–45	39	15	3500	Moderate	Hybrid	12		https://journals.sagepub.com/home/mtq	Yes	2001	24	No	Publishes papers dedicated to the philosophical, conceptual, and theoretical issues in marketing.	0	0	0	0.25	0	1	1	0	0	0.676	0
621	Journal of Strategy & Innovation	2753-8321		Business & Management (General)		Elsevier								1 category: Strategy		Quarterly	180		68	2.27061	58.5	70.4	21.3	8000	14–28	5	13	3060	Moderate		12		https://link.springer.com/journal/43452	No			No	Publishes research on the intersection of business strategy and innovation, covering strategic management, competitive advantage, and disruptive technologies.	0.257	0.281	0.113	1	0.248	1	0	1	0	0.982	0
162	International Journal of Law and Management	2056-1474	2056-1482	Business & Management (General)	Social Sciences	Emrald	C	Q2	1.9	2.9	0.356	24	2.3	2 categories: Law + Management	46	Quarterly	400	13.3	65	2.27065	49.3	64.3	14.3	8000	10–21	20	0	3200	Moderate	Hybrid	0		https://www.emeraldgrouppublishing.com/journal/ijlama	No	1979	46	No	Focuses on the interdisciplinary intersection of law and management, covering legal aspects of business and organizational governance.	0.045	0.046	0.014	0.5	0	1	0	0	0	0	0
593	Management International Review	1861-8901	1861-8901	Business & Management (General)	Business, Management and Accounting	Springer	A	Q1	4.1	6.3	1.483	67	4.63	1 category: International	65	Quarterly	450	15	75	2.27214	69.1	74.1	27.5	8000	21–45	4	0		Moderate		12		https://link.springer.com/journal/11575	No	1960	65	No	Provides a forum for research that is international in scope and relevant to the theory and practice of international management, with a strong European tradition.	0.071	0.065	0.051	1	0.436	0.952	0	1	0	0.95	0
545	Managerial Finance	0265-5021		Business & Management (General)	Economics, Econometrics and Finance	Emrald	B	Q2	2.2	2.5	0.329	45	1.77	1 category: Finance	50	Quarterly	500	16.3	68	2.2744	77.7	69.4	19.4	8000	14–28	30	0		Moderate		12		https://emeraldgrouppublishing.com/journal/mf	No	1975	50	No	Publishes research on corporate finance, financial management, and financial decision-making with relevance to managers.	0	0.111	0.024	1	0	1	0	0	0	0.903	0
908	Technological Sustainability	2752-7102	2752-7110	Sustainability & Environmental Management		Emrald		Q2		3.1	0.33			2 categories: Tech + Sustainability	3	Quarterly	300	8.1		2.27647	78.1	71.6	25.2	8000		16	0	3200	Easy	Hybrid	0		#N/A	No	2022	3	No	Focuses on research on technology's role in achieving sustainability and the sustainability of technology itself.	0.071	0.154	0.062	0.75	0.553	0.976	1	0	0	0.897	0.77
446	Social Influence	1553-4510	1553-4529	Business & Management (General)	Psychology	T&F		Q4	0.6	1.8	0.383	33	1.58	1 category: Influence	19	Quarterly	350	11	62	2.27826	59.1	69.1	27.1	10000	10–21	28	15	3160	Moderate		0		https://www.tandfonline.com/journals/psif20	No	2006	19	No	Focuses on research on the psychological and social processes of social influence, covering persuasion, conformity, and attitude change.	0.067	0.058	0.015	0.75	0	1	1	0	0	0.956	0
661	Nonprofit Management & Leadership	1047-2459	1542-7854	Business & Management (General)		Wiley		Q1	1.9		1.05	69		1 category: Nonprofit	35	Quarterly	400	13	65	2.27851	55	66.4	18.3	8000	10–21	28	0	3470	Moderate	Hybrid	0		https://onlinelibrary.wiley.com/journal/15427854	Yes	1990	35	No	A premier journal focusing on research on nonprofit organizations, philanthropy, leadership, and governance.	0	0	0	0	0	1	1	0	0	0.882	0
352	Transportation Journal	0041-1612	2329-849X	Information Systems & Digital Business	Social Sciences	Wiley	B	Q3	1	2.5	0.247	42	2.09	1 category: Transportation	64	Quarterly	350	11	65	2.27894	71.9	65	21.7	8000	10–21	13	0	3570	Moderate		0		https://www.psupress.org/journals/jnls/Transportation-Journal/	No	1961	64	No	Publishes research on the economics, management, and policy of the transportation and logistics industry.	0.078	0.084	0.048	1	0.244	0.976	0	0	0	0.847	0.777
465	Journal of Financial Crime	1359-0790	1756-3788	Marketing		Emrald	B	Q1	2.3	2.6		25		2 categories: Finance + Crime	31	Quarterly	600	18.5	68	2.27959	77.2	66.4	15.9	8000	14–28	56	0	2500	Moderate	Hybrid	0		https://www.emeraldgrouppublishing.com/journal/jfc	No	1994	31	No	Dedicated to research on financial crime, fraud, money laundering, and regulatory compliance.	0	0	0	0	0	1	0	0	0	0.985	0
400	Central Bank Review	1303-9257	2146-5917	Economics	Economics, Econometrics and Finance	Elsevier	C	Q2	1.2	3.3	0.435	12	2.31	Specialized	12	Quarterly	400	13	70	2.27964	71.5	46.9	10.2	8000	14–30	0	11	3290	Moderate	Diamond OA	0		https://www.sciencedirect.com/journal/central-bank-review	No	2013	12	No	Focuses on research and policy analysis related to monetary policy, financial stability, and central banking globally.	0	0	0	1	0.502	1	1	0	0	0.991	0.973
64	Public Administration and Development	0271-2075	1099-162X	Information Systems & Digital Business	Social Sciences	Wiley	A	Q1	2.1	3	0.535	50	2.15	2 categories: Public Admin + Development	44	Quarterly	350	11	72	2.28052	82.9	65.7	12.1	8000	14–30	17	0	3010	Lengthy	Hybrid	0		https://onlinelibrary.wiley.com/journal/1099162x	No	1981	44	No	Focuses on research on public administration, policy, and development in low and middle-income countries.	0.522	0.346	0.178	1	0	1	1	0	0	0.971	0.98
417	Journal of Scheduling	1094-6136	1099-1425	Sustainability & Environmental Management	Engineering	Springer	A	Q1	1.8	3.7	0.797	64	2.16	1 category: Scheduling	27	Quarterly	500	16	72	2.28346	74.9	72.3	24.6	8000	14–30	42	0	3190	Lengthy	Subscription	0		https://link.springer.com/journal/10951	No	1998	27	No	Publishes research on the theory, algorithms, and applications of scheduling and sequencing problems.	0.25	0.231	0.059	1	0.408	1	0	0	0	0.903	0
762	Qualitative Research in Accounting & Management	1541-658X	1541-6598	Business & Management (General)		Emrald		Q2	3.1		0.71			2 categories: Qualitative + Accounting	21	Quarterly	300	8.4	65	2.28379	85	68.7	23.6	8000	10–21	33	0	3000	Moderate	Hybrid	0		https://www.emeraldgrouppublishing.com/journal/qram	No	2004	21	No	Focuses on qualitative research methods and their application in accounting and management studies.	0.179	0.154	0.056	1	0	1	0	0	0	0.988	0.993
519	Journal of Economic Studies	0144-8730	1758-6910	Business & Management (General)	Economics, Econometrics and Finance	Emrald	B	Q2	2.4	4.5	0.528	51	2.24	Specialized	35	Quarterly	450	14.5	70	2.28438	66.9	72	17.9	8000	14–30	28	0	2500	Moderate	Hybrid	0		https://www.emeraldgrouppublishing.com/journal/jes	No	1990	35	No	Publishes research on economics across a wide range of theoretical and applied topics.	0.037	0.058	0.053	1	0	1	1	0	0	0.785	0.926
365	Public Finance Review	1091-1421	1552-7575	Marketing	Economics, Econometrics and Finance	Sage	B	Q2	1	1.2	0.248	35	0.64	Specialized	52	Quarterly	350	10.8	70	2.28519	61.2	68.6	22.4	8000	14–30	24	26	3030	Moderate	Hybrid	12		https://journals.sagepub.com/home/pfr	No	1973	52	No	Focuses on research on public sector finance, fiscal policy, taxation, and public expenditures.	0.082	0.101	0.025	0.75	0	1	0	0	0	0.921	0
78	Journal of Sports Economics	1527-0025	1552-7524	Education Management	Economics, Econometrics and Finance	Sage	B	Q1	1.5	3.5	0.713	53	2.27	Specialized	25	Quarterly	450	14.4	72	2.2875	81.2	61.9	13.4	8000	14–30	59	24	3000	Lengthy	Hybrid	12		https://journals.sagepub.com/home/jse	No	2000	25	No	Publishes research that applies economic theory to the sports industry, covering labor markets, finance, and policy.	0.067	0	0	0	0	1	1	0	0	0	0.986
225	Evidence-based HRM: a Global Forum for Empirical Scholarship	2049-3983	2049-3991	Business & Management (General)		Emrald			2			22		1 category: HRM	12	Quarterly	500	15.7	68	2.2907	72.8	69.4	22.5	8000	14–28	68	0	4520		Hybrid	0		https://www.emeraldgrouppublishing.com/journal/ebhrm	No	2013	12	No	Publishes evidence-based empirical research that contributes to the theory and practice of Human Resource Management (HRM).	0	0	0	0	0	1	0	0	0	0	0
368	Statistics and Computing	1573-1375	1573-1375	Business & Management (General)	Decision Sciences	Springer	A	Q1	1.6	3.6	0.94	82	2.27	2 categories: Statistics + Computing	34	Quarterly	700	20	65	2.29087	52.5	74.4	27.5	8000	10–21	3	0	3040	Moderate	Hybrid	0		https://link.springer.com/journal/11222	No	1991	34	No	Publishes research on the intersection of statistics, computation, and data analysis, including algorithms and software.	0.235	0	0	1	0.853	1	1	0	0	0.974	0.878
1017	Journal of Hospitality and Tourism Management	1839-5260	1839-5260	Economics	Business, Management and Accounting	Elsevier	A	Q1	7.8	10.1	1.773	59	9.35	Specialized	30	Quarterly	700	20	70	2.29201	78.3	77.1	47.3	8000	14–30	5	9	2990	Moderate		0		#N/A	Yes	1995	30	No	Publishes research on hospitality and tourism management, including strategy, operations, marketing, and sustainable development.	0.16	0.18	0.089	1	0	1	1	0	0	0.909	0
143	Food Quality and Preference	0950-3293	1873-6330	Engineering & Technology	Nursing	Elsevier	A	Q1	4.9	10.7	1.161	144	6.54	1 category: Food Quality	40	Monthly	700	20	70	2.29201	67.1	72.7	25.2	8000	14–30	3	4	3750	Lengthy	Hybrid	0		https://www.sciencedirect.com/journal/food-quality-and-preference	No	1985	40	No	Dedicated to research on food quality, consumer food choice, and sensory science, including psychological, physiological, and sociological factors.	0	0	0	0	0	1	1	0	0	0.874	0.797
156	Small Enterprise Research	1321-590X	2471-1589	Marketing		T&F	C	Q1	1.8			23		1 category: Small Enterprise	34	Quarterly	250	5	65	2.29285	84	46.4	10.1	8000	10–21	0	16	3200	Moderate	Hybrid	0		https://www.tandfonline.com/journals/rser20	No	1991	34	No	Focuses on research on small enterprise, entrepreneurship, and small business management.	0	0	0	0	0	1	1	0	0	0.971	0
810	Emerging Markets Review	1566-0141	1877-6261	Operations & Supply Chain	Economics, Econometrics and Finance	Elsevier	A	Q1	4.6	6.5	1.104	63	4.88	1 category: Emerging	25	Quarterly	500	15		2.29412	53.6	72.3	20.7	8000		26	5	3900	Moderate	Hybrid	24		https://www.sciencedirect.com/journal/emerging-markets-review	No	2000	25	No	Publishes research on financial markets and institutions in emerging economies, covering investments, corporate finance, and economic development.	0.06	0.087	0.021	0.75	0	1	1	0	0	0.724	0
862	Pacific-Basin Finance Journal	0927-538X	1873-8410	Business & Management (General)		Elsevier	A		5.3			80		1 category: Pacific	32	Quarterly	500	15		2.29412	50.2	78	42.8	8000		3	4		Moderate		12		https://www.sciencedirect.com/journal/pacific-basin-finance-journal	No	1993	32	No	Focuses on research on financial markets and institutions in the Pacific Basin and Asian regions.	0.123	0.137	0.055	1	0	0.952	1	1	0	0.947	0
913	Management System Engineering	2588-9274		Engineering & Technology		Springer		Q4			0.12			2 categories: Management + Systems	2	Quarterly	200			2.30103	75.2	52.8	21.5	8000		58	0	3470	Easy		0		#N/A	No	2023	2	No	Publishes research on the design, optimization, and management of complex systems using systems engineering principles, often in industrial contexts.	0.03	0	0	0.75	0	1	0	0	0	0.985	0.993
814	Focus on Surfactants	2667-1756		Business & Management (General)		Elsevier								1 category: Surfactants	27	Quarterly	200			2.30103	78.9	72.7	31.8	10000		0	0	3630	Easy	Subscription			https://www.sciencedirect.com/journal/focus-on-surfactants	No	1998	27	No	A specialized journal focusing on the science, technology, and market analysis of surfactants (surface-active agents) and their applications.	0.179	0.262	0.444	1	0.4	0.905	1	0	0	0.874	0.547
899	Strategic Business Research	2052-1197		Business & Management (General)		Elsevier								1 category: Strategy		Quarterly	200			2.30103	84.6	72.3	10.3	8000		0	0	3000	Easy	Gold OA			Manual search needed	Yes			No	Focuses on research on strategic management, business models, and corporate strategy.	0.306	0.315	0.095	1	0	1	1	0	0	0.985	0.959
821	Human Settlements and Sustainability		3050-6077	Business & Management (General)		Elsevier								2 categories: Human + Sustainability	2	Quarterly	200			2.30103	84.6	73.3	22.6	8000		5	0		Easy		12		https://www.sciencedirect.com/journal/human-settlements-and-sustainability	Yes	2023	2	No	Focuses on research related to sustainable urban development, planning, and human settlements in a changing world.	0.127	0.125	0.12	1	0	1	1	0	0	0.994	0.959
872	Sports Economics Review	2590-482X	2590-4838	Marketing		Elsevier						12		1 category: Sports	2	Quarterly	200			2.30103	73.6	73	40.9	8000		0	2		Easy		0		https://www.sciencedirect.com/journal/sports-economics-review	No	2023	2	No	Dedicated to economic analysis of the sports industry, including labor markets, finance, regulation, and the economic impact of events.	0.22	0.221	0.114	1	0	1	0	0	0	0.959	0.811
894	Zorgvisie	0044-4691		Healthcare Management		Springer								1 category: Healthcare (Dutch)	40	Quarterly	200			2.30103	64.8	76.7	13.9	8000		0	0		Easy				https://www.zorgvisie.nl	Yes	1985	40	No	A Dutch term that translates to "Care Vision," this is likely a publication focusing on healthcare management, policy, and innovation in the Netherlands.	0.194	0.291	0.08	1	0.25	1	0	0	0	0.974	0.946
932	Design Science Vision		2950-2624	Engineering & Technology		Elsevier								1 category: Design		Quarterly	200			2.30103	66.9	69.7	14.7	8000		0	0						#N/A	No			No	A general scope covers design and implementation of electronic devices, circuits, and communication systems, with an interest in AI applications.	0.067	0.108	0.04	1	0	1	0	0	0	0.985	0
158	Quality Management Journal	1068-6967	2378-5549	Business & Management (General)		T&F	B	Q2	2.9			19		1 category: Quality	32	Quarterly	350	10	60	2.3034	74.5	65.3	19.8	8000	7–14	6	0		Moderate	Subscription	0		https://www.tandfonline.com/journals/uqmj20	No	1993	32	No	Publishes research that advances the theory and practice of quality management and continuous improvement.	0.123	0	0	0	0	1	0	0	0	0.929	0.919
955	Intelligent Systems in Accounting, Finance and Management	1055-6103	1099-1174	Business & Management (General)	Economics, Econometrics and Finance	Wiley			3.7	5.2	0.625	16	3.32	0	35	Quarterly	300	7		2.30372	52.1	70.1	24.8	8000		8	0	2900	Moderate	Hybrid	0		https://onlinelibrary.wiley.com/journal/10991106	No	1990	35	No	Publishes research on the application of intelligent systems (AI, machine learning) to accounting, finance, and general management.	0.034	0.067	0.039	0.75	0	0.952	0	1	0	0.979	0
538	Journal of Organizational Computing and Electronic Commerce	1091-9392	1532-7702	Business & Management (General)	Computer Science	T&F	A	Q2	1.9	5.8	0.7	45	3.08	2 categories: IT + Organization	34	Quarterly	350	10	62	2.30386	69	68.7	18.3	10000	10–21	35	0		Moderate		12		https://www.tandfonline.com/journals/woce20	No	1991	34	No	Focuses on the application and impact of computing and electronic commerce technologies within organizations, including systems and strategies.	0.362	0.284	0.237	1	0.295	1	0	0	0	0.988	0
553	The International Journal of Entrepreneurship and Innovation	1465-7503	1741-2854	Business & Management (General)		Sage		Q2	2.2		0.75			1 category: Entrepreneurship	25	Quarterly	350	10	65	2.30454	46.2	68.7	31.7	8000	10–21	31	20		Moderate		0		https://journals.sagepub.com/home/iei	No	2000	25	No	Publishes research on entrepreneurship, new venture creation, and organizational innovation.	0	0	0	0.75	0.524	1	1	0	0	0.985	0
1027	Canadian Journal of Administrative Sciences / Revue Canadienne des Sciences de l'Administration	0825-0383	1936-4476	Business & Management (General)		Wiley		Q2	0.9		0.89			1 category: Admin	41	Quarterly	350	10	68	2.30523	82.8	80.3	28.3	8000	14–28	9	0	3140	Moderate	Hybrid	12		#N/A	Yes	1984	41	No	Publishes research on administrative sciences and management with relevance to Canadian and international contexts.	0	0	0	0.25	0.5	1	1	0	0	0.968	0
1026	Canadian Journal of Agricultural Economics/Revue canadienne d'agroeconomie	0008-3976	1744-7976	Economics		Wiley		Q2	2.1		0.72			Specialized	72	Quarterly	400	12	68	2.30538	46.4	76.7	41.7	8000	14–28	5	0		Moderate		0		#N/A	No	1953	72	No	Publishes research on agricultural economics and applied economics relevant to Canada and international issues.	0.086	0	0	0	0	1	0	0	0	0.935	0
982	Journal of Strategy and Management	1755-4268	1755-4268	Marketing	Business, Management and Accounting	Emrald	C	Q2	3	5.2	0.709	27	3.38	1 category: Strategy	19	Quarterly	400	11.4		2.30543	83.9	72.3	31.5	8000		23	0	2500	Moderate	Hybrid	12		https://www.emeraldgrouppublishing.com/journal/jsma	No	2006	19	No	Publishes research on strategic management, planning, and organizational leadership with a focus on managerial application.	0.138	0.173	0.052	1	0	0	0	0	0	0.941	0
972	International Journal of Sustainability in Higher Education	1467-6370	1758-6368	Business & Management (General)	Social Sciences	Emrald		Q1	3.4	6.1	0.752	72	3.68	2 categories: Sustainability + Higher Ed	25	Quarterly	900	21.9		2.30726	65.2	74.8	22.1	8000		60	0	2500	Moderate	Hybrid	0		https://www.emeraldgrouppublishing.com/journal/ijshe	No	2000	25	No	Focuses on sustainability policy, teaching, research, and practice within the context of higher education institutions.	0.041	0.048	0.01	0.5	0	1	0	0	0	0.682	0
130	The International Journal of Information and Learning Technology	2056-4880	2056-4899	Business & Management (General)		Emrald			2.6			45		2 categories: IT + Education	41	Bimonthly	400	11.8	55	2.30764	45.3	66.8	18.2	10000	7–14	53	0	2960	Moderate	Hybrid	0		https://www.emeraldgrouppublishing.com/journal/ijilt	No	1984	41	No	Focuses on the design, use, and impact of information and learning technologies in educational settings.	0	0	0	0.75	0	1	0	0	0	0.885	0
509	Asian Review of Accounting	1321-7988	1758-201X	Business & Management (General)	Economics, Econometrics and Finance	Emrald	B	Q2	1.9	2.9	0.431	28	2.07	1 category: Accounting	32	Quarterly	350	9.7	62	2.31154	56.6	48.2	10.1	8000	10–21	60	0	3320	Moderate	Hybrid	12		https://www.emeraldgrouppublishing.com/journal/ara	No	1993	32	No	Dedicated to research on accounting, auditing, and financial reporting issues relevant to the Asian region.	0	0	0	0	0.316	1	0	0	0	0.988	0
113	WFUMB Ultrasound Open		2949-6683	HRM & Organizational Behavior		Elsevier						8		1 category: Ultrasound	4	Quarterly	200		48	2.31207	54.4	66.4	9.7	8000	5–10	0	0	4830	Easy	Gold OA	0		https://www.sciencedirect.com/journal/wfumb-ultrasound-open	No	2021	4	No	Likely an open-access journal associated with the World Federation for Ultrasound in Medicine and Biology, covering all aspects of clinical and technical ultrasound.	0.265	0.168	0.094	0	0.746	0.952	1	1	0	0.947	0
106	Immuno-Oncology and Technology	2590-1413		Tourism & Hospitality		Elsevier		Q1		5.9		8		1 category: Immuno-Oncology	4	Quarterly	200		52	2.313	83.7	72.4	12.7	8000	7–14	0	0	3980	Moderate		0		https://www.sciencedirect.com/journal/immuno-oncology-and-technology	No	2021	4	No	Specialized journal publishing research on innovations and applications of technology in the field of immuno-oncology.	0.056	0.113	0.019	0.5	0.917	1	1	0	0	0.926	0
271	Spanish Journal of Marketing - ESIC	2444-9695	2444-9709	Marketing		Emrald		Q2	5.3			22		1 category: Marketing	10	Quarterly	400	11.6	60	2.31402	58.9	65.8	18.5	8000	7–14	63	0	2500	Moderate	Hybrid	12		https://www.emeraldgrouppublishing.com/journal/sjm	No	2015	10	No	Publishes research on marketing topics with a focus on the Spanish, Portuguese, and Latin American contexts, covering strategy and consumer behavior.	0.168	0.151	0.072	1	0	1	1	0	0	0.991	0.98
746	Journal of Railway Science and Technology		2971-5585	Business & Management (General)		Elsevier						15		1 category: Railway	2	Quarterly	200		58	2.31438	64.6	74.8	30.3	8000	7–14	0	0	3400	Moderate		0		https://www.emeraldgrouppublishing.com/journal/jrst	No	2023	2	No	Publishes research on all aspects of railway science, technology, engineering, and operations, including safety and infrastructure.	0	0	0	0.5	0.553	1	1	0	0	0.826	0
720	International Journal of Quality & Reliability Management	0265-6710	1758-4500	Business & Management (General)		Emrald	B	Q1	3		0.94			1 category: Quality	41	Quarterly	900	22.2	70	2.31449	69.1	69.7	23.8	8000	14–30	81	0	3400	Moderate		12		https://www.emeraldgrouppublishing.com/journal/ijqrm	Yes	1984	41	No	Focuses on research related to quality management, reliability engineering, and continuous improvement.	0.045	0.082	0.012	0.5	0	1	1	0	0	0.971	0
204	New Technology, Work and Employment	1468-005X	1468-005X	Engineering & Technology	Business, Management and Accounting	Wiley			7.3	7.3	1.669	56	6.91	0	39	Triannual	400	11		2.31583	61.6	72.3	23.4	12000		19	0	2160	Moderate		12		https://onlinelibrary.wiley.com/journal/14680033	No	1986	39	No	Publishes research on the social, economic, and policy implications of new technology on work, employment, and labor relations.	0.134	0.197	0.114	0	0	1	1	0	0	0.897	0.75
619	Review of Evolutionary Political Economy	2730-6758		Business & Management (General)		Springer		Q1		2.4	0.28	11		Specialized	5	Quarterly	200		65	2.31599	51.3	68.7	26.5	10000	10–21	14	0	3090	Moderate	Hybrid	12		https://link.springer.com/journal/43253	Yes	2020	5	No	Publishes research that applies evolutionary, institutional, and historical approaches to political economy.	0.045	0.127	0.026	1	0	1	0	0	0	0.859	0
681	Controlling & Management Review	2195-8262	2195-8270	Strategy & International Business		Springer								1 category: Controlling	68	Quarterly	200		65	2.31599	49.4	70.4	17.1	8000	10–21	0	0	2590	Moderate	Hybrid			https://www.controlling-management-review.de	No	1957	68	No	Focuses on research and practice related to management control, performance management, and internal accounting.	0.075	0.065	0.049	1	0	1	0	0	0	0.991	0.946
612	Evolutionary and Institutional Economics Review	1349-5568	1349-9296	Sustainability & Environmental Management		Springer			0.5			14		Specialized	6	Quarterly	200		65	2.31599	57.9	49.9	17.6	8000	10–21	9	0	2490	Moderate	Hybrid	0		https://link.springer.com/journal/40844	No	2019	6	No	Publishes research that applies evolutionary and institutional economics to understand economic and social change.	0	0	0	0.75	0	1	0	0	0	0.956	0
629	Environmental Management: Economics and Policy	2665-9486	2665-9494	Business & Management (General)		Elsevier						14		2 categories: Reliability & Quality		Quarterly	200		68	2.31668	83.7	73	20.3	8000	14–28	0	0		Moderate		12		https://link.springer.com/journal/44261	No			No	Publishes research on the economics, policy, and governance aspects of environmental management.	0.067	0	0	0	0	1	0	0	0	0.953	0.872
600	AMS Review	1869-8178	1869-8186	Marketing		Springer	B	Q2		2.7	0.26	33		1 category: Marketing	14	Quarterly	200		70	2.31714	70.1	70.1	15.9	8000	14–30	12	0	3290	Lengthy	Hybrid	12		https://link.springer.com/journal/13162	No	2011	14	No	The official review journal of the Academy of Marketing Science, publishing conceptual and theoretical review articles across marketing.	0.09	0	0.064	1	0	0.976	1	0	0	0.876	0.824
418	Review of Derivatives Research	1383-2994	1573-0496	Information Systems & Digital Business	Economics, Econometrics and Finance	Springer	B	Q2	0.9	1.1	0.247	28	0.96	Specialized	28	Quarterly	200		75	2.31829	48.9	67.6	18.2	8000	21–45	19	0	3190	Moderate	Hybrid	24		https://link.springer.com/journal/11147	No	1997	28	No	Publishes high-quality articles that contribute to the theory and practice of financial derivatives, including pricing, hedging, and risk management.	0.09	0.137	0.034	0.75	0	1	0	0	0	0.8	0
505	Journal of Research in Marketing and Entrepreneurship	1471-521X	1471-521X	Economics	Business, Management and Accounting	Emrald	B	Q2	3.1	2.6	0.424	27	2.13	2 categories: Marketing + Entrepreneurship	20	Quarterly	400	11.4	60	2.31926	54.5	67.6	14.6	8000	7–14	93	0		Moderate		12		https://www.emerald.com/jrme	No	2005	20	No	Focuses on the intersection of marketing and entrepreneurship, covering new venture marketing and entrepreneurial selling.	0.067	0.053	0.018	0.75	0.611	1	1	0	0	0.944	0
15	VINE Journal of Information and Knowledge Management Systems	2589-3542	2589-3550	Economics	Social Sciences	Emrald	B	Q1	2.9	5.4	0.568	37	3.64	2 categories: IT + Knowledge Management	29	Bimonthly	380	10.6	58	2.3197	69.1	59.3	18.9	8000	7–14	70	0		Moderate		12		https://www.emeraldgrouppublishing.com/journal/vjikms	No	1996	29	No	Focuses on information, knowledge management, and library and information science research.	0	0	0	0	0	1	0	0	0	0.9	0
76	Public Finance and Management	1523-9769		Business & Management (General)		Sage	B							1 category: Public Finance	24	Quarterly	300	6.9	70	2.32234	53.8	63.2	11.7	8000	14–30	44	32		Lengthy	Diamond OA	0		https://journals.sagepub.com/home/pfm	No	2001	24	No	This appears to be a transcription error or an unusual title. Assuming Public Finance and Management, the scope would be public sector finance, budgeting, and financial management.	0	0	0	0	0	1	0	0	0	0	0
880	The North American Journal of Economics and Finance	1062-9408	1879-0860	Business & Management (General)		Elsevier	B	Q1	3.9		1.03			1 category: North America	33	Quarterly	800	20		2.32247	61.5	76.7	46.3	8000		5	5		Moderate		24		https://www.sciencedirect.com/journal/the-north-american-journal-of-economics-and-finance	No	1992	33	No	Publishes research on economics and finance with a specific focus on North America and its global context.	0.03	0	0	0	0	1	0	0	0	0.924	0
823	Infrared Physics & Technology	1350-4495	1879-0554	Business & Management (General)		Elsevier		Q2	3.4		0.89			Specialized	33	Quarterly	800	20		2.32247	60.8	74.8	33.9	8000		4	3	3300		Hybrid	12		https://www.sciencedirect.com/journal/infrared-physics-and-technology	Yes	1992	33	No	Publishes research on the physics, technology, and applications of infrared and far-infrared radiation.	0.063	0.05	0.038	0.75	0	0.976	1	0	0	0.859	0
733	Journal of Fashion Marketing and Management: An International Journal	1361-2026	1758-5698	Business & Management (General)		Emrald		Q1	3.3		1.12			1 category: Fashion	28	Quarterly	600	16.9	65	2.32365	76.3	70.4	16.2	10000	10–21	60	0	2500	Moderate	Hybrid	12		https://www.emeraldgrouppublishing.com/journal/jfmm	No	1997	28	No	Dedicated to research on marketing, retail, and management within the fashion and apparel industry.	0.179	0	0	0	0.321	1	1	0	0	0.888	0
219	China Agricultural Economic Review	1756-1394	1756-1408	Business & Management (General)	Agricultural and Biological Sciences	Emrald	C	Q1	4.6	7.9	0.947	33	5.33	Multi Category	16	Quarterly	400	11.3	70	2.32418	51	47.3	18.9	8000	14–30	47	0		Moderate		12		https://www.emeraldgrouppublishing.com/journal/caer	No	2009	16	No	Publishes research on agricultural economics, food security, rural development, and environmental issues within the context of China.	0	0	0	0	0	1	1	0	0	0.691	0
258	Journal of Research in Interactive Marketing	2040-7121	2040-713X	Entrepreneurship & Innovation	Business, Management and Accounting	Emrald	B	Q1	11.6	12.6	2.833	50	13.58	1 category: Interactive	18	Quarterly	500	14.4	66	2.32557	53.7	72.3	24.3	8000	10–21	39	0	3980	Moderate		12		https://www.emeraldgrouppublishing.com/journal/jrim	No	2007	18	No	Focuses on interactive, digital, and online marketing, including social media, e-commerce, personalization, and customer engagement.	0.381	0.524	0.65	1	0.712	0.905	0	0	0	0.912	0.574
384	RAUSP Management Journal	2531-0488	2531-0488	Business & Management (General)	Business, Management and Accounting	Emrald		Q2	2.2	4.3	0.598	13	2.11	1 category: Management	59	Quarterly	350	9.1	62	2.3269	81.9	42.3	11.7	8000	10–21	59	0		Moderate		12		https://www.emeraldgrouppublishing.com/journal/rausp	No	1966	59	No	A Brazilian journal publishing research on business administration and management topics.	0.03	0.089	0.019	0.5	0	1	0	0	0	0	0.98
249	Journal of Global Operations and Strategic Sourcing	2398-5372	2398-5372	Entrepreneurship & Innovation	Decision Sciences	Emrald	C	Q1	2.7	5.5	0.656	27	5.45	1 category: Operations	7	Quarterly	300	6.6	65	2.32867	78.3	66.4	21.9	9000	10–21	46	0	3300	Moderate	Hybrid	12		https://www.emeraldgrouppublishing.com/journal/jgoss	No	2018	7	No	Publishes research on global operations, strategic sourcing, and supply chain management.	0.246	0.2	0.364	1	0	0.952	1	1	0	0.994	0.966
671	The Career Development Quarterly	0889-4019		Business & Management (General)		Wiley		Q2	2.3		0.86	61		1 category: Career	72	Quarterly	400	11	58	2.32927	60	50.6	19.2	8000	7–14	13	0	3730	Moderate	Hybrid	12	Seal	https://onlinelibrary.wiley.com/journal/21610045	Yes	1953	72	No	Publishes research and practice-based articles on career development, vocational guidance, and work-life balance.	0.127	0.161	0.088	1	0.56	1	0	0	0	0.991	0.953
652	Human Factors and Ergonomics in Manufacturing & Service Industries	1090-847X	1520-6564	Entrepreneurship & Innovation		Wiley		Q2	2.2		0.82			1 category: Ergonomics	34	Quarterly	350	9	68	2.33084	74.9	68	22.5	10000	14–28	11	0	3500	Moderate	Hybrid	12		https://onlinelibrary.wiley.com/journal/15206564	No	1991	34	No	Publishes research on human factors, ergonomics, and safety applied to manufacturing and service industry settings.	0	0	0	0	0.282	1	0	0	0	0	0
640	The Australian Journal of Agricultural and Resource Economics	1364-985X	1467-8489	Business & Management (General)		Wiley	A	Q1	2.1		1.03	56		1 category: Resource	68	Quarterly	400	11	70	2.33204	54.1	74.4	30.2	8000	14–30	20	0	3500	Moderate	Hybrid	12		https://onlinelibrary.wiley.com/journal/14678276	No	1957	68	No	Publishes research on the economics of agriculture, natural resources, and the environment relevant to Australia.	0	0	0	0	0	1	1	0	0	0	0
1042	Applied Psychology: Health and Well-Being	1758-084X	1758-0858	Entrepreneurship & Innovation	Psychology	Wiley		Q1	3.6	9.3	2.053	43	8.64	1 category: Health	16	Triannual	400	11	70	2.33204	66.1	77.4	30.4	8000	14–30	0	0	2000	Moderate	Hybrid	0		#N/A	Yes	2009	16	No	Publishes research that applies psychological principles to promote health, well-being, and quality of life.	0.037	0.072	0.019	0.75	0	1	1	0	0	0	0.939
559	The Journal of Environment & Development	1070-4965	1552-6757	Sustainability & Environmental Management		Sage		Q2	2		0.83			2 categories: Environment + Development	33	Quarterly	300	6.5	70	2.33232	69.7	71.6	27.5	8000	14–30	17	21	3000	Moderate	Hybrid	12		https://journals.sagepub.com/home/jed	No	1992	33	No	Focuses on research that links environmental issues with socio-economic development in international contexts.	0.101	0	0	0	0	1	1	0	0	0.994	0.926
264	Meditari Accountancy Research	2041-9456	2041-9464	HRM & Organizational Behavior	Economics, Econometrics and Finance	Emrald	A	Q1	4.4	5	0.793	31	5.14	1 category: Accountancy	32	Quarterly	600	16.5	68	2.33553	72.1	42.3	15.9	8000	14–28	47	0	3500	Moderate	Hybrid	0		https://www.emeraldgrouppublishing.com/journal/medar	No	1993	32	No	Publishes research on accounting and finance with a strong emphasis on methodological pluralism and relevance to practice.	0.276	0	0	1	0	1	0	0	0	0.991	0.973
307	Urban Climate	2212-0950		Sustainability & Environmental Management	Earth and Planetary Sciences	Elsevier		Q1	6.9	8.7	1.185	63	6.62	1 category: Urban Climate	12	Monthly	800	20	68	2.33826	52.8	72.7	24.9	8000	14–28	12	10	3890	Moderate		0		https://www.sciencedirect.com/journal/urban-climate	No	2013	12	No	Focuses on climate-related issues in urban areas, including climate change impacts, mitigation, adaptation, and urban heat island effects.	0.134	0	0	0	0	1	0	0	0	0.853	0
444	International Journal of Psychophysiology	0167-8760	1872-7612	Accounting & Finance	Neuroscience	Elsevier		Q1	2.6	4.8	0.854	141	3.01	1 category: Psychophysiology	41	Quarterly	800	20	70	2.33873	81.2	72.3	11.2	8000	14–30	2	4		Moderate		0		https://www.sciencedirect.com/journal/international-journal-of-psychophysiology	No	1984	41	No	Focuses on research on the physiological bases of psychological processes, including cognitive, emotional, and behavioral aspects.	0.254	0.012	0.003	0	0	1	1	0	0	0.838	0
20	Central European Management Journal	2337-1422	2337-1430	Strategy & International Business		Emrald		Q2	2.9			15		2 categories: Business + Regional	17	Quarterly	400	10.6	58	2.33973	73.2	62.1	22.8	8000	7–14	36	0		Moderate		12		https://www.emeraldgrouppublishing.com/journal/cemj	No	2008	17	No	Publishes research on management, business, and economics with a focus on Central and Eastern European countries.	0.272	0.296	0.107	1	0.427	1	0	0	0	0.982	0.98
735	Journal of Indian Business Research	1755-4209	1755-4209	Sustainability & Environmental Management	Business, Management and Accounting	Emrald	C	Q2	2.7	3.4	0.412	24	3	1 category: India	16	Quarterly	300	6.1	65	2.34114	59.7	72.3	24.8	8000	10–21	109	0	3470	Moderate	Hybrid	0		https://www.emeraldgrouppublishing.com/journal/jibr	No	2009	16	No	Focuses on research on business, management, and economic issues relevant to the Indian context.	0.075	0.055	0.018	0.75	0.397	1	1	0	0	0.774	0
752	Management of Environmental Quality: An International Journal	1477-7835	1758-5922	Business & Management (General)		Emrald			4.1			63		2 category: Policy & Law	22	Quarterly	500	13.8	65	2.34163	66.7	73.3	26.9	8000	10–21	31	0	2280	Moderate	Hybrid	12		https://www.emeraldgrouppublishing.com/journal/meq	No	2003	22	No	Focuses on environmental quality management, sustainable development, and environmental performance in organizations.	0.03	0.05	0.026	1	0	1	1	0	0	0.891	0
1001	Management Accounting Research	1096-1224	1096-1224	Business & Management (General)	Decision Sciences	Elsevier	A*	Q1	4	5	1.167	96	3.94	1 category: Management	35	Quarterly	400	10		2.34185	45.6	79.8	44.2	8000		5	9		Lengthy		12		https://www.sciencedirect.com/journal/management-accounting-research	Yes	1990	35	No	Publishes theoretical and empirical research on management accounting and its role in organizations.	0.261	0.274	0.51	1	0	0.905	1	1	0	0.791	0
498	Journal of Multi-Criteria Decision Analysis	1099-1360	1099-1360	Business & Management (General)	Decision Sciences	Wiley	B	Q2	2.4	4.1	0.488	52	2.46	1 category: Multi-Criteria	33	Quarterly	300	6	68	2.34433	53.6	69.7	27.6	8000	14–28	4	0	2900	Moderate	Hybrid	0		https://onlinelibrary.wiley.com/journal/10991360	No	1992	33	No	Focuses on the theory, methodology, and application of multi-criteria decision making (MCDM) and analysis.	0.052	0.062	0.016	0.5	0	1	0	1	0	0.976	0
231	International Journal of Accounting & Information Management	1834-7649		Business & Management (General)		Emrald			4.9			49		2 categories: Accounting + IT	35	Quarterly	400	10.4	65	2.3466	75.6	49.9	15.9	8000	10–21	52	0	2950	Moderate	Hybrid	0		https://www.emeraldgrouppublishing.com/journal/ijaaim	No	1990	35	No	Focuses on research that links accounting and information management, covering areas like accounting information systems, technology adoption, and corporate reporting.	0	0.082	0.053	0.75	0	1	1	0	0	0	0
941	International Journal of Market Research	1470-7853	1746-1329	HRM & Organizational Behavior	Economics, Econometrics and Finance	Sage	A	Q2	1.4	4.8	0.771	61	3.49	1 category: Market	67	Quarterly	450	11.4		2.35075	60.8	74.8	36.7	8000		20	13	3000	Moderate	Hybrid	12		https://journals.sagepub.com/home/mrj	No	1958	67	No	Publishes research on the theory, practice, and methodology of market research and consumer insight.	0.108	0.118	0.036	0.75	0	1	1	0	0	0.9	0
503	Statistical Analysis and Data Mining	1932-5817	1932-5825	Accounting & Finance	Mathematics	Wiley		Q2	3.6	2.2	0.456	35	1.49	1 category: Data Mining	17	Quarterly	350	8	62	2.35505	52	70.4	18.4	8000	10–21	13	0	3500	Moderate	Hybrid	24		https://onlinelibrary.wiley.com/journal/19321872	No	2008	17	No	Focuses on statistical methods and techniques for data mining and analysis, emphasizing applications in business and science.	0.09	0.125	0.027	0.75	0	1	0	0	0	0.982	0
58	Journal of Innovation & Knowledge	2444-569X	2444-5703	Business & Management (General)		Elsevier	A		15.5			80		1 category: Innovation	9	Quarterly	1000	22	65	2.35521	66.6	74.7	31.6	8000	10–21	5	14	2900	Moderate	Gold OA	12		https://www.sciencedirect.com/journal/journal-of-innovation-and-knowledge	No	2016	9	No	Covers the intersection of innovation, knowledge creation, and knowledge management within organizations and economic systems.	0	0	0	0	0	1	0	0	0	0.591	0
967	International Journal of Managing Projects in Business	1753-8386	1753-8386	Business & Management (General)	Business, Management and Accounting	Emrald	C	Q2	3.1	5.2	0.705	43	3.91	1 category: Projects	17	Quarterly	600	15.2		2.35587	46.3	50.6	26.9	8000		35	0	3400	Moderate	Hybrid	0		https://www.emeraldgrouppublishing.com/journal/ijmpb	No	2008	17	No	Dedicated to research on the management and leadership of projects, programs, and portfolios in a business context.	0.022	0	0	0	0.553	1	1	0	0	0.9	0
635	Land Degradation & Development	1085-3278	1099-145X	Accounting & Finance		Wiley		Q1	3.7		1.78			1 category: Land	35	Quarterly	1000	22	72	2.35685	72.4	76.7	19.4	8000	14–30	24	0	3990	Moderate		0		https://onlinelibrary.wiley.com/journal/1099145X	No	1990	35	No	Focuses on the processes, impacts, and management of land degradation, covering desertification, soil erosion, and climate change effects.	0	0	0	0	0	1	0	0	0	0	0
215	Asian Journal of Accounting Research	2443-4171	2443-4198	Business & Management (General)		Emrald	C	Q2		2.8	0.27	22		1 category: Accounting	10	Quarterly	350	7.9	62	2.35761	65.5	39.3	10.9	8000	10–21	49	0		Moderate	Diamond OA	0		https://www.emeraldgrouppublishing.com/journal/ajar	No	2015	10	No	Publishes research on accounting, auditing, and financial reporting issues relevant to the Asian region.	0	0	0	1	0	1	1	0	0	0.997	0.973
75	Information and Organization	1471-7727	1873-7740	Sustainability & Environmental Management	Computer Science	Elsevier	A*	Q1	4.7	10.7	1.997	70	7.31	2 categories: IT + Organization	34	Quarterly	400	10	68	2.35778	68.5	71.4	19.3	8000	14–28	23	18	4430	Lengthy		0		https://www.sciencedirect.com/journal/information-and-organization	Yes	1991	34	No	Focuses on research into the social, organizational, and political implications of information technology and information systems.	0.138	0.113	0.026	1	0	1	1	0	0	0.865	0
798	Arab Journal of Mathematical Sciences	2468-040X	2468-0418	Business & Management (General)		Emrald		Q4		1.5		11		1 category: Mathematics	30	Quarterly	300	4.8		2.35822	67.5	71.6	28.6	8000		63	0	3410	Easy		0		https://www.sciencedirect.com/journal/arab-journal-of-mathematical-sciences	No	1995	30	No	Publishes research on pure and applied mathematics and mathematical statistics.	0.123	0.159	0.039	1	0.376	1	0	0	0	0.815	0
710	International Journal of Numerical Methods for Heat & Fluid Flow	0961-5539	1758-1323	Engineering & Technology		Emrald			5.1			98		1 category: Numerical	34	Quarterly	1000	21.9	70	2.3594	75.1	48.3	11.4	8000	14–30	23	0	3830	Lengthy	Hybrid	12		https://www.emeraldgrouppublishing.com/journal/hff	No	1991	34	No	Focuses on numerical methods and computational modeling for problems related to heat transfer and fluid flow.	0.03	0.351	0.114	1	0	1	0	0	0	0.712	0
462	Journal of Applied Accounting Research	0967-5426	2046-8342	Business & Management (General)	Economics, Econometrics and Finance	Emrald	B	Q1	3.7	3.9	0.567	31	3.3	1 category: Accounting	25	Quarterly	400	9.9	65	2.3597	50.6	69.1	28.9	8000	10–21	46	0	2500	Moderate	Hybrid	0		https://www.emeraldgrouppublishing.com/journal/jaar	Yes	2000	25	No	Publishes high-quality applied research in accounting and finance, emphasizing relevance to policy-makers, regulators, and practitioners.	0.328	0.385	0.303	1	0	0.905	0	1	0	0	0
691	Corporate Governance	1472-0701	1472-071X	Business & Management (General)		Emrald	C		4.9			63		1 category: Governance	24	Quarterly	700	17.6	72	2.36124	84	72.7	28.1	8000	14–30	62	0		Moderate		0		https://www.emeraldgrouppublishing.com/journal/cg	No	2001	24	No	Dedicated to scholarly research on corporate governance, including board structure, accountability, shareholder rights, and international governance systems.	0.142	0.113	0.064	1	0.479	0.952	0	1	0	0.988	0.953
997	Journal of Economic Psychology	0167-4870	1872-7426	HRM & Organizational Behavior	Psychology	Elsevier	A	Q1	2.3	5.2	1.601	112	3.34	Multi Category	44	Quarterly	600	15		2.36143	52.5	55	35.7	8000		20	5	3700	Moderate	Hybrid	12		https://www.sciencedirect.com/journal/journal-of-economic-psychology	No	1981	44	No	Dedicated to research on the psychological processes underlying economic behavior and decision-making.	0.373	0.288	0.223	1	0.237	0.905	0	1	0	0.968	0
847	Journal of International Financial Markets, Institutions & Money	1042-4431	1872-7485	Sustainability & Environmental Management		Elsevier			6.1			98		0	34	Quarterly	600	15		2.36143	46.3	75.4	38.1	10000		8	7				12		https://www.sciencedirect.com/journal/journal-of-international-financial-markets-institutions-and-money	No	1991	34	No	Publishes high-quality research on international finance, including markets, financial institutions, and global monetary issues.	0.265	0.255	0.092	1	0.043	1	0	1	0	0.994	0.986
448	Economic Development Quarterly	0891-2424	1552-3294	Accounting & Finance	Economics, Econometrics and Finance	Sage	B	Q1	1.6	1.8	0.475	53	1.37	2 categories: Economics + Development	38	Quarterly	400	9.8	68	2.36302	73.8	68.3	13.9	8000	14–28	18	27	3500	Moderate	Hybrid	12		https://journals.sagepub.com/home/edq	No	1987	38	No	Publishes research on local and regional economic development and policy.	0	0	0	0.75	0	1	1	0	0	0.844	0.878
222	COMPEL	0332-1649	1758-6163	Business & Management (General)		Emrald		Q2	1		0.56	37		1 category: Computational	63	Quarterly	600	15.4	55	2.36324	56.4	65.6	11.4	8000	7–14	27	0	3550	Moderate	Hybrid	12		https://www.emeraldgrouppublishing.com/journal/compel	No	1962	63	No	Focuses on research on the computation and analysis of electromagnetic fields and electrical machines.	0.108	0.091	0.022	1	0	1	1	0	0	0.688	0
379	Environmental Geotechnics	2051-803X	2051-8048	Healthcare Management	Earth and Planetary Sciences	Emrald		Q2	2.6	5	0.435	23	1.6	1 category: Geotechnics	11	Quarterly	500	13	65	2.36337	78.3	70.1	17.8	8000	10–21	90	0	2770	Moderate		0		https://www.emeraldgrouppublishing.com/journal/jenge	No	2014	11	No	Publishes research on the interaction between geotechnical engineering and environmental issues, including pollution and waste containment.	0	0	0	0	0	1	1	0	0	0	0
684	Arab Gulf Journal of Scientific Research: Water, Energy, Food and Environment	2772-5955		Education Management		Emrald						16		0	2	Quarterly	250	1.3		2.36677	63.3	51.7	16.3	8000		42	0				0		https://www.emeraldgrouppublishing.com/journal/agjsr	No	2023	2	No	Publishes research on science, technology, and policy related to water, energy, food, and environmental issues in the Arab Gulf region.	0.164	0.183	0.05	1	0.306	1	0	0	0	0.865	0
6	International Journal of Web Information Systems	1573-0402	1758-7060	Business & Management (General)	Computer Science	Emrald		Q2	2.3	2.8	0.337	20	2.24	1 category: Web Systems	20	Quarterly	380	8.7	50	2.36712	53.7	50.5	13.2	8000	7–14	12	0	3120	Moderate		0		https://www.emeraldgrouppublishing.com/journal/ijwis	No	2005	20	No	Publishes research on web-based information systems, technologies, and applications.	0.063	0.096	0.042	1	0.464	1	0	0	0	0.95	0
221	China Finance Review International	2044-1398	2044-1401	Entrepreneurship & Innovation	Economics, Econometrics and Finance	Emrald	C	Q1	7.6	6.9	1.494	17	5.93	Specialized	15	Quarterly	350	7.5	70	2.36974	51.3	48.6	16.8	8000	14–30	30	0	3580	Moderate		0		https://www.emeraldgrouppublishing.com/journal/cfri	No	2010	15	No	Dedicated to research on financial markets, institutions, and services within China and its regional/global impact.	0	0	0	0.75	0	1	1	0	0	0.974	0
461	International Journal of Productivity and Performance Management	1758-6658	1758-6658	Engineering & Technology	Business, Management and Accounting	Emrald	B	Q1	3.5	6.3	0.732	71	4.68	1 category: Productivity	23	Quarterly	800	18.9	68	2.37042	49.6	70.4	14.2	8000	14–28	82	0	3000	Moderate	Hybrid	12		https://www.emeraldgrouppublishing.com/journal/ijppm	No	2002	23	No	Focuses on productivity improvement, performance measurement, and strategic management across various sectors.	0.067	0.079	0.052	1	0.462	1	0	0	0	0.929	0
1035	Interactive Technology and Smart Education	1741-5650	1741-5669	Entrepreneurship & Innovation	Computer Science	Emrald		Q1	5.6	8.5	1.184	27	8.1	2 categories: Interactive + Education	21	Quarterly	400	9.4	60	2.37161	67.1	52.8	40.9	8000	7–14	73	0	4310	Moderate	Hybrid	0		#N/A	No	2004	21	No	Focuses on the use and impact of interactive technologies and smart systems in educational settings for enhancing learning and teaching.	0.086	0.096	0.024	0.75	0.472	0.976	1	1	0	0.918	0
825	International Economics	2110-7017	2110-7025	Business & Management (General)		Elsevier		Q1	3.1	4.7		29		1 category: International	6	Quarterly	500	12		2.37509	75.2	74.1	32.1	8000		2	6	3720	Moderate	Gold OA	12		https://www.sciencedirect.com/journal/international-economics	No	2019	6	No	Publishes research on international trade, international finance, and related international economic issues.	0.254	0.392	0.191	1	0	1	1	0	0	0.941	0.804
70	Information Systems Frontiers	1387-3326	1573-7601	Engineering & Technology	Mathematics	Springer	A	Q1	8.3	11.1	1.424	79	7.43	1 category: Information Systems	26	Bimonthly	900	20	62	2.37805	66.6	74.1	25.2	8000	10–21	45	0	3570	Moderate	Hybrid	0		https://link.springer.com/journal/10796	No	1999	26	No	Focuses on leading-edge research at the intersection of information systems and new technologies, exploring emerging applications and challenges.	0	0	0	0	0	1	0	0	0	0.95	0
590	Telecommunication Systems	1018-4864	1572-9443	Business & Management (General)	Engineering	Springer		Q2	2.3	5.1	0.612	59	3.06	1 category: Telecom	32	Quarterly	900	20	68	2.37947	74.1	69.7	29.3	8000	14–28	5	0	3630	Moderate		0		https://link.springer.com/journal/11235	No	1993	32	No	Publishes research on the modeling, performance, and optimization of telecommunication systems and networks.	0	0	0	1	0.568	1	0	0	0	0.785	0
171	Business Perspectives and Research	2278-5339	2278-5347	Business & Management (General)		Sage	C	Q2		2.9	0.28	22		1 category: Business	13	Quarterly	300	4.4	65	2.38352	49.6	40.2	12.4	8000	10–21	0	0	3500	Moderate	Hybrid	0		https://journals.sagepub.com/home/bpr	No	2012	13	No	Focuses on providing fresh insights and intellectual debates on key issues and trends in business and management, with a multidisciplinary approach.	0.119	0.18	0.118	1	0.306	1	0	0	0	0	0
558	The Journal of Applied Behavioral Science	0021-8863	1552-6803	Education Management		Sage	B	Q1	2.4		1.09			1 category: Behavioral	60	Quarterly	450	10.8	75	2.38442	47.1	70.1	33.8	8000	21–45	17	24	3500	Moderate	Hybrid	12		https://journals.sagepub.com/home/jab	No	1965	60	No	Publishes research on planned change, organizational development (OD), and applied behavioral science in social and organizational systems.	0.052	0	0	0	0.397	1	1	0	0	0.788	0
745	Journal of Product & Brand Management	1061-0421	1838-5926	Business & Management (General)		Emrald	A		5.7			98		1 category: Brand	33	Quarterly	500	12	70	2.39172	56.4	69.1	25.9	8000	14–30	37	0	5210	Moderate	Hybrid	12		https://www.emeraldgrouppublishing.com/journal/jpbm	No	1992	33	No	Focuses on the research and practice related to managing products and brands, including strategy, equity, and consumer responses.	0	0	0	0	0	1	0	0	0	0.888	0
647	Industrial Relations	1468-232X	1468-232X	Business & Management (General)	Business, Management and Accounting	Wiley		Q1	2.6	3.2	0.804	60	2.33	1 category: Relations	63	Quarterly	500	12	75	2.39291	78.3	74.1	34.7	8000	21–45	7	0	3500	Moderate	Hybrid	0		https://onlinelibrary.wiley.com/journal/1468232X	No	1962	63	No	A leading journal publishing research on labor economics, industrial relations, human resources, and the labor market.	0.09	0.07	0.042	1	0	0.952	0	1	0	0.982	0
449	Global Business Review	0973-0664	0973-0664	Business & Management (General)	Business, Management and Accounting	Sage	C	Q2	1.9	4.3	0.459	37	2.7	1 category: Business	25	Quarterly	500	11.9	65	2.39325	78.5	43.2	20.7	8000	10–21	0	0	3000	Moderate	Hybrid	12		https://journals.sagepub.com/home/gbr	No	2000	25	No	Publishes research on global business, management, and economic issues with an international and emerging markets perspective.	0.25	0.212	0.07	1	0.954	1	1	0	0	0.95	0.98
958	Growth and Change	0017-4815	1468-2254	Strategy & International Business	Environmental Science	Wiley	B	Q3	2.1	5	0.72	61	3.63	Specialized	55	Quarterly	400	8		2.3939	45.9	24.4	33.9	8000		39	0	3400	Moderate	Hybrid	0		https://onlinelibrary.wiley.com/journal/14682257	No	1970	55	No	An interdisciplinary journal focusing on regional economic development, urban studies, and policy analysis.	0.131	0.087	0.027	1	0	1	1	0	0	0.868	0
232	International Journal of Bank Marketing	1758-6598	1758-6598	Marketing	Business, Management and Accounting	Emrald	A	Q1	6.9	9.9	1.088	96	6.73	1 category: Banking	42	Bimonthly	500	11.9	68	2.39396	45.2	72	27.8	8000	14–28	34	0		Moderate		12		https://www.emeraldgrouppublishing.com/journal/ijbm	No	1983	42	No	Publishes research and case studies on marketing strategies, consumer behavior, and service quality in the financial services sector, specifically banking.	0	0	0	0	0	1	1	0	0	0.888	0
973	International Journal of Sociology and Social Policy	0144-333X	1758-6562	Business & Management (General)	Economics, Econometrics and Finance	Emrald	B	Q2	1.3	4.3	0.596	45	3.34	1 category: Sociology	44	Quarterly	500	11.3		2.39399	77.6	70.4	35.7	8000		18	0	3300	Easy	Hybrid	0		https://www.emeraldgrouppublishing.com/journal/ijssp	No	1981	44	No	Publishes research on sociology and social policy, emphasizing cross-national and comparative analysis.	0	0	0	0	0	1	1	0	0	0	0
886	International Journal of Human Computer Interaction	1044-7310	1532-7590	Business & Management (General)		T&F								2 categories: HCI + Human	41	Quarterly	800	17.5		2.39505	83.6	79.8	28.9	8000		0	0	2900	Moderate		0		https://www.tandfonline.com/journals/hihc20	No	1984	41	No	Dedicated to the design, use, and evaluation of computer systems and human-computer interfaces in terms of human capabilities and limitations.	0.015	0.014	0.004	0.75	0.509	1	0	0	0	0	0
1030	Organizational Psychology Review	2041-3865	2041-3873	Strategy & International Business	Psychology	Sage	A	Q1	7.1	7.6	2.97	36	7.54	1 category: Org Psych	14	Quarterly	400	8.6	75	2.39612	73.3	74.4	44.8	8000	21–45	35	35	3200	Lengthy	Hybrid	12		#N/A	No	2011	14	No	Publishes conceptual and theoretical review articles that synthesize and advance knowledge in organizational psychology, organizational behavior, and HRM.	0	0	0	0	0	1	0	0	0	0.888	0
915	Journal of Business Venturing Design	2666-4075		Business & Management (General)		Elsevier								1 category: Venturing	3	Quarterly	250			2.39794	45.5	69.1	13.2	8000		10	5	3000	Moderate		0		#N/A	Yes	2022	3	No	Focuses on the design, development, and scaling of new ventures and the processes of entrepreneurial innovation.	0	0	0	0	0.553	1	1	0	0	0.768	0
993	Journal of Marketing Analytics	2050-3318	2050-3326	Business & Management (General)	Economics, Econometrics and Finance	Springer	C	Q1	3.5	6	0.792	16	3.73	1 category: Analytics	12	Quarterly	250			2.39794	81.9	69.1	38.5	8000		3	0	3290	Easy	Hybrid	0		https://www.palgrave.com/gp/journal/41270	No	2013	12	No	Publishes research on analytical methods, modeling, and data-driven approaches to solve marketing problems.	0.381	0	0	0	0	1	0	0	0	0.938	0
897	Brain Science and Child Development	2045-8840		Business & Management (General)		Elsevier								1 category: Brain		Quarterly	250			2.39794	67.7	60	21.8	8000		0	0						Manual search needed	Yes			No	Likely covers research on neuroscience, brain development, and cognitive/behavioral development in children.	0.049	0	0	0.5	0	1	0	0	0	0.638	0
876	The Journal of Economic Asymmetries	1703-4949	1872-6837	Business & Management (General)		Elsevier	B		2.9			25		1 category: Asymmetries	21	Quarterly	250			2.39794	50.5	78.3	34.8	8000		5	7	3440	Easy	Gold OA	0		https://www.sciencedirect.com/journal/the-journal-of-economic-asymmetries	No	2004	21	No	Focuses on research on economic asymmetries, inequalities, and differences in income, development, and market power.	0.231	0.228	0.059	1	0	1	0	0	0	0	0
799	Archives of Rehabilitation Research and Clinical Translation	2590-0727		Marketing		Elsevier		Q2	2					1 category: Rehabilitation	7	Quarterly	250			2.39794	63.7	49.4	15.3	8000		0	9	2600		Gold OA	0		https://www.sciencedirect.com/journal/archives-of-rehabilitation-research-and-clinical-translation	No	2018	7	No	Publishes research on rehabilitation science, clinical practice, and translational research across all aspects of rehabilitation.	0	0	0	0	0	1	0	0	0	0.747	0
552	Group & Organization Management	1059-6011	1552-6862	Business & Management (General)		Sage	A	Q1	3.5		2.01	105		1 category: Group	49	Quarterly	500	11.8	78	2.39906	50.7	74.1	20.1	8000	30–60	25	14	2900	Moderate	Hybrid	0		https://journals.sagepub.com/home/gom	No	1976	49	No	Publishes research on group dynamics, teamwork, and management within and between organizations.	0	0.142	0.114	1	0	1	1	0	0	0	0
822	Information and Software Technology	0950-5849	1872-6756	Economics	Computer Science	Elsevier	A	Q1	4.3	9.2	1.182	116	5.34	1 category: Software	46	Monthly	1000	20		2.4	49.8	72	19.3	8000		7	5		Moderate		12		https://www.sciencedirect.com/journal/information-and-software-technology	No	1979	46	No	Focuses on the development, implementation, management, and evaluation of software and information systems.	0.075	0	0	0	0.38	1	0	0	0	0.876	0
811	Energy Research & Social Science	2214-6298		Business & Management (General)		Elsevier		Q1	7.4	12.3		129		2 categories: Energy + Social	11	Quarterly	1000	20		2.4	47	53.9	27.1	8000		10	12		Moderate		0		https://www.sciencedirect.com/journal/energy-research-and-social-science	No	2014	11	No	A leading journal for social science research on energy systems and energy policy, covering anthropology, economics, political science, and sociology.	0.037	0.075	0.014	0.75	0	1	1	0	0	0.85	0
675	Business Ethics, the Environment & Responsibility	2694-6885	2694-6893	Strategy & International Business		Wiley			4.2			80		0	33	Quarterly	500	11		2.40208	78.2	74.4	22.6	8000		33	0	3400	Moderate	Hybrid	0		https://onlinelibrary.wiley.com/journal/26946424	No	1992	33	No	A journal focusing on business ethics, corporate social responsibility, and the management of environmental performance.	0.108	0.082	0.053	1	0	1	1	0	0	0.888	0
961	European Management Review	1740-4762	1740-4762	Sustainability & Environmental Management	Business, Management and Accounting	Wiley	C	Q1	2.8	6.1	1.098	38	4.14	1 category: Management	20	Quarterly	450	10	60	2.40222	54.9	73	27.1	8000	10-12	27	0	810	Moderate	Hybrid	0		https://onlinelibrary.wiley.com/journal/17404762	No	2005	20	No	Publishes high-quality research that enhances the understanding of management and organization theory and practice globally and in Europe.	0.086	0.058	0.025	0.75	0.547	1	0	0	0	0.956	0
347	International Journal of Training and Development	1360-3736	1468-2419	HRM & Organizational Behavior	Social Sciences	Wiley	C	Q2	1.5	2.8	0.431	36	2.06	2 categories: Training + Development	28	Quarterly	450	10	65	2.40341	46.6	70.1	22.8	10000	10–21	18	0	3500	Moderate	Hybrid	0		https://onlinelibrary.wiley.com/journal/14682419	No	1997	28	No	Publishes research on training, learning, and development in organizational and professional contexts globally.	0.291	0	0	0	0.532	1	0	0	0	0.712	0
163	International Journal of Manpower	1758-6577	1758-6577	Operations & Supply Chain	Business, Management and Accounting	Emrald	A	Q1	3.5	5.8	0.824	67	5.29	1 category: Manpower	45	Bimonthly	450	10	68	2.40413	79.3	69.9	22.7	8000	14–28	34	0	2810	Moderate		0		https://www.emeraldgrouppublishing.com/journal/ijm	No	1980	45	No	Publishes research on labor economics, human resource management, and employment relations from an international perspective.	0.44	0.264	0.638	1	0	0.952	0	1	0	0.994	0.912
1023	Journal of Intellectual Capital	1758-7468	1758-7585	Tourism & Hospitality	Business, Management and Accounting	Emrald	B	Q1	6.8	12.1	1.582	105	7.95	2 categories: Intellectual + Capital	25	Bimonthly	1000	20.4	68	2.40424	73.8	77.4	46.5	8000	14–28	34	0		Lengthy		0		#N/A	No	2000	25	No	Dedicated to research on intellectual capital (IC), knowledge management (KM), and organizational learning, including measurement and strategic management.	0.269	0.269	0.122	1	0	1	1	0	0	0.974	0.953
183	The Journal of Entrepreneurship	0971-3557	0973-2067	Business & Management (General)		Sage			1.9			34		1 category: Entrepreneurship	33	Quarterly	300	3.5	68	2.40668	57.6	39.6	10.5	9000	14–28	0	0	4880	Lengthy	Hybrid	0		https://journals.sagepub.com/home/joe	No	1992	33	No	Publishes research on entrepreneurship, small business, and new venture creation with a focus on emerging economies.	0.063	0.096	0.021	0.75	0	0.976	0	0	0	0	0
86	Journal of Co-operative Organization and Management	2213-2988	2213-2988	Business & Management (General)	Business, Management and Accounting	Elsevier		Q2	2.5	3.4	0.631	17	2.75	1 category: Co-operative	9	Quarterly	250		58	2.41185	63.7	65.3	14.6	8000	7–14	39	17	2000	Moderate	Gold OA	0		https://www.sciencedirect.com/journal/journal-of-co-operative-organization-and-management	No	2016	9	No	Dedicated to research on the management, governance, and organization of co-operative and mutual enterprises.	0.116	0.149	0.039	0.75	0.335	0.976	1	1	0	0.932	0
971	International Journal of Quality and Service Sciences	1756-6703	1756-6703	Economics	Business, Management and Accounting	Emrald	B	Q1	3.9	5	0.545	35	3.59	1 category: Quality	14	Quarterly	400	7.3		2.41211	79.5	72	20.6	8000		47	0	2500	Easy	Hybrid	0		https://www.emeraldgrouppublishing.com/journal/ijqss	No	2011	14	No	Focuses on research related to service quality, service science, and total quality management.	0.075	0	0	0	0	1	0	0	0	0.971	0
152	Medicine in Novel Technology and Devices	2590-1502		Engineering & Technology		Elsevier		Q2	5.6	5.4		14		2 categories: Medicine + Tech	6	Quarterly	250		60	2.41233	49.1	68.7	18.9	8000	7–14	6	6	2640	Moderate		0		https://www.sciencedirect.com/journal/medicine-in-novel-technology-and-devices	No	2019	6	No	Publishes research on the integration of new technologies (e.g., AI, IoT, robotics) into medical practice and the development of novel medical devices.	0.093	0.125	0.033	1	0	1	1	0	0	0.868	0
195	Asian Journal of Business Ethics	2210-927X	2210-9288	Public Administration & Policy		Springer	C	Q1	3.2			11		Multi Category	13	Quarterly	250		60	2.41233	63.9	43.2	13.4	8000	7–14	16	0	3870	Moderate	Hybrid	0		https://link.springer.com/journal/13520	No	2012	13	No	Publishes research on business ethics, corporate social responsibility, and ethical decision-making with a focus on the Asian context.	0.067	0	0	0	0	1	0	0	0	0.803	0
609	Information Technology & Tourism	1098-3058	1943-5181	Business & Management (General)		Springer	B	Q1	7	7.5		45		2 categories: IT + Tourism	27	Quarterly	250		60	2.41233	67.2	69.7	18.1	8000	7–14	23	0	3590	Moderate	Hybrid	12		https://link.springer.com/journal/40558	Yes	1998	27	No	Publishes research on the application and impact of information technology (IT) in the tourism, travel, and hospitality industries.	0.183	0.24	0.075	1	0	1	1	0	0	0.806	0
730	Journal of Digital Management	2515-3738	2515-3746	Engineering & Technology		Springer								1 category: Digital	2	Quarterly	250		60	2.41233	59.5	76.7	35.9	8000	7–14	0	0	2990	Moderate	Hybrid	0		https://www.emeraldgrouppublishing.com/journal/jdm	No	2023	2	No	Focuses on the management and strategy of digital transformation, technologies, and digital business models.	0.347	0.317	0.128	1	0.353	1	0	0	0	0.921	0
422	Publishing Research Quarterly	0885-4750	1936-4794	Business & Management (General)	Engineering	Springer	C	Q2	1.7	1.5	0.302	19	1.02	1 category: Publishing	40	Quarterly	250		62	2.41281	56.7	66.4	14.7	8000	10–21	46	0	3290	Moderate	Hybrid	0		https://link.springer.com/journal/12109	No	1985	40	No	Focuses on research on the publishing industry, covering economics, technology, marketing, and copyright.	0.224	0.216	0.134	1	0.81	0.952	1	1	0	0.968	0
111	Perioperative Care and Operating Room Management	2405-6038		Education Management		Elsevier		Q2	1			12		1 category: Perioperative	9	Quarterly	250		62	2.41281	48.2	63.3	10.8	8000	10–21	6	3	2000	Moderate	Gold OA	0		https://www.sciencedirect.com/journal/perioperative-care-and-operating-room-management	No	2016	9	No	Focuses on research and practice related to patient care, safety, and management in the perioperative period and operating rooms.	0	0.221	0.09	1	0.459	1	1	0	0	0	0
526	European Political Science	1680-4333	1682-1553	Business & Management (General)	Social Sciences	Springer		Q1	1.9	4.3	0.812	28	1.74	1 category: Political	23	Quarterly	250		65	2.41353	58.6	72.3	19.1	8000	10–21	18	0		Moderate		12		https://www.palgrave.com/gp/journal/41304	No	2002	23	No	Publishes research on political science, policy, and governance with a strong focus on European politics and institutions.	0	0	0	0	0	1	0	0	0	0	0
631	Global Economics Research			Information Systems & Digital Business		Elsevier						8		1 category: Global	2	Quarterly	250		65	2.41353	82.5	69.3	18.7	8000	10–21	0	0		Moderate		12		https://link.springer.com/journal/44292	No	2023	2	No	Focuses on economic research with global significance, likely covering international trade, finance, development, and macroeconomic policy.	0.078	0.096	0.043	0.75	0.547	0.952	0	0	0	0.932	0.872
331	International Review of Economics Education	1477-3880	1478-8578	Business & Management (General)	Social Sciences	Elsevier	C	Q2	1.4	3	0.426	24	2.54	Multi Category	23	Quarterly	250		65	2.41353	48	69.4	19.7	8000	10–21	0	8	5250	Moderate	Hybrid	12		https://www.sciencedirect.com/journal/international-review-of-economics-education	No	2002	23	No	Dedicated to research and issues related to the teaching and learning of economics at all educational levels.	0	0	0	0	0.524	1	0	0	0	0.938	0
706	Finance Research Open		3050-7006	Business & Management (General)		Elsevier								1 category: Finance	1	Quarterly	250		65	2.41353	46.8	69.1	15.6	8000	10–21	0	0		Moderate		0		https://www.emeraldgrouppublishing.com/journal/fro	No	2024	1	No	An open-access journal for high-quality research across all areas of finance.	0	0	0	0	0	1	0	0	0	0.594	0
790	International Journal of Disclosure and Governance	1741-3591	1741-3605	Business & Management (General)	Economics, Econometrics and Finance	Springer	B	Q2	2.4	3.2	0.468	22	3.25	1 category: Governance	21	Quarterly	250		68	2.41425	77.2	69.7	22.1	8000	14–28	15	0	3990	Moderate	Hybrid	12		https://www.palgrave.com/gp/journal/41261	No	2004	21	No	Focuses on research on corporate disclosure, transparency, and governance in global organizations.	0.299	0.358	0.117	1	0	1	0	0	0	0.997	0
536	Transnational Corporations Review	1918-6444	1918-6452	Operations & Supply Chain	Economics, Econometrics and Finance	Elsevier	C	Q2	1.8	4.3	0.604	18	3.16	Specialized	16	Quarterly	250		70	2.41473	75	49.9	16.1	8000	14–30	26	13	3740	Lengthy	Subscription	0		https://www.tandfonline.com/journals/rtcr20	No	2009	16	No	Focuses on research on transnational corporations (TNCs), foreign direct investment (FDI), and their impact on host countries.	0	0	0	0	0.583	1	1	0	0	0	0
620	International Cybersecurity Law Review	2197-4277	2197-4285	Healthcare Management		Springer								2 categories: Cyber + Law	5	Quarterly	250		70	2.41473	56.3	68.3	18.9	8000	14–30	6	0	3290	Lengthy	Hybrid	0		https://link.springer.com/journal/43439	No	2020	5	No	Focuses on research and analysis of cybersecurity law, policy, and regulation in the international context.	0.056	0.07	0.026	0.75	0	1	0	0	0	0.9	0
506	Applied Economic Analysis	2517-5674		Business & Management (General)	Economics, Econometrics and Finance	Emrald	B	Q2	2.5	2.7	0.535	15	2.04	Specialized	6	Quarterly	300	3.1	68	2.41665	52	68.7	17.3	8000	14–28	16	0		Moderate		12		https://www.emeraldgrouppublishing.com/journal/aea	No	2019	6	No	Focuses on empirical and applied research in economics, emphasizing policy relevance and data analysis.	0.052	0.106	0.03	0.75	0	1	1	0	0	0.982	0
419	Synthese	0039-7857	1573-0964	Business & Management (General)	Arts and Humanities	Springer		Q1	1.3	2.6	0.808	77	1.55	1 category: Philosophy	89	Quarterly	1000	20	70	2.4168	79.9	74.1	21.9	8000	14–30	6	0	2800	Lengthy	Hybrid	12		https://link.springer.com/journal/11229	No	1936	89	No	A journal for research on epistemology, methodology, and philosophy of science.	0	0	0	1	0	1	0	0	0	0.891	0
234	International Journal of Intelligent Computing and Cybernetics	1756-3702	1756-3710	Business & Management (General)	Computer Science	Emrald		Q2	2.6	5.5	0.568	23	5.57	1 category: AI	17	Quarterly	350	5.5	58	2.41809	83.1	68.7	21.4	8000	7–14	7	0	2500	Moderate	Hybrid	0		https://www.emeraldgrouppublishing.com/journal/ijicc	No	2008	17	No	Focuses on research on intelligent computing, artificial intelligence, and cybernetics.	0.034	0	0	0	0.571	1	0	0	0	0	0
1003	Social Networks	0378-8730	1873-4554	Business & Management (General)	Psychology	Elsevier		Q1	2.4	5	1.203	109	3.41	1 category: Networks	47	Quarterly	700	15		2.41833	85	80.6	33.4	8000		4	17	3000	Moderate	Hybrid	0		https://www.sciencedirect.com/journal/social-networks	No	1978	47	No	Dedicated to research on the theory, methodology, and applications of social network analysis, covering structures, dynamics, and processes.	0.291	0.014	0.004	0.75	0.611	1	1	0	0	0.85	0
464	Journal of Advances in Management Research	2049-3207	2049-3207	Business & Management (General)	Business, Management and Accounting	Emrald		Q2	2.6	6	0.67	28	4.55	1 category: Management	21	Quarterly	500	10.9	65	2.42041	84.2	46.9	17.6	8000	10–21	69	0	2500	Moderate	Hybrid	12		https://www.emeraldgrouppublishing.com/journal/jamr	No	2004	21	No	Publishes research that contributes to management theory and practice, covering a wide range of business functions.	0	0	0	0	0	1	0	0	0	0	0
218	Business Process Management Journal	1758-6698	1758-6698	Operations & Supply Chain	Business, Management and Accounting	Emrald	B	Q1	5.8	8	0.918	90	5.08	1 category: BPM	30	Bimonthly	700	15.5	68	2.42046	80.9	71.9	24.7	8000	14–28	28	0	3360	Moderate	Hybrid	0		https://www.emeraldgrouppublishing.com/journal/bpmj	No	1995	30	No	Publishes research on business process management (BPM), including design, modeling, automation, and organizational change.	0	0	0	0.75	0	1	1	0	0	0.694	0.905
556	ILR Review	2162-271X	2162-271X	HRM & Organizational Behavior	Business, Management and Accounting	Sage		Q1	3.7		3.37	88	3.04	1 category: Labor	78	Quarterly	800	17.2	80	2.42299	73.9	73	26.4	8000	30–60	46	24		Moderate		0		https://journals.sagepub.com/home/ilr	No	1947	78	No	A leading interdisciplinary journal publishing research on work, employment, and labor relations, covering economics, law, history, and sociology.	0.313	0.406	0.296	1	0	1	1	0	0	0	0.872
707	Gender in Management: An International Journal	1754-2413	1754-2421	Tourism & Hospitality		Emrald	C	Q2	2.6		0.89			2 categories: Gender + Management	39	Quarterly	400	7.5	68	2.42327	46.7	71.6	22.9	8000	14–28	40	0	2500	Moderate	Hybrid	0		https://www.emeraldgrouppublishing.com/journal/gm	No	1986	39	No	Focuses on research and practice related to gender issues in management and organizations, including leadership and diversity.	0.09	0.139	0.04	1	0	1	0	0	0	0.932	0
943	Organization	1461-7323	1461-7323	Economics	Business, Management and Accounting	Sage	A	Q1	3.1	6.8	1.96	110	4.03	1 category: Organization	31	Quarterly	900	17.8		2.42839	46.8	77.1	34.9	8000		57	24		Lengthy		12		https://journals.sagepub.com/home/org	No	1994	31	No	A journal for publishing critical and theoretical research on organizations and organizing, drawing on social theory and philosophy.	0.075	0.125	0.035	1	0	1	0	0	0	0.991	0
463	Journal of Asia Business Studies	1558-7894	1555-9065	Business & Management (General)	Economics, Econometrics and Finance	Emrald	C	Q1	3	5.8	0.74	27	4.82	2 categories: Business + Asia	18	Quarterly	450	9	62	2.42939	79.4	49.4	20.3	8000	10–21	48	0	3400	Moderate	Hybrid	12		https://www.emeraldgrouppublishing.com/journal/jabs	No	2007	18	No	Publishes research on business, management, and economic issues specific to the Asian business context.	0.16	0.163	0.057	1	0.885	0.952	1	1	0	0.918	0
524	Review of Accounting and Finance	1475-7708		Education Management	Economics, Econometrics and Finance	Emrald	B	Q2	2.7	2.6	0.392	29	2.47	1 category: Accounting	23	Quarterly	350	5.1	65	2.43001	73.8	70.1	16.7	8000	10–21	32	0	3500	Moderate	Hybrid	0		https://www.emeraldgrouppublishing.com/journal/raf	No	2002	23	No	Publishes research that contributes to the theory and practice of accounting and finance.	0	0	0	0	0	1	1	0	0	0	0.986
409	Advances in Developing Human Resources	1552-3055	1552-3055	Public Administration & Policy	Business, Management and Accounting	Sage	C	Q2	2.4	4	0.758	53	2.98	1 category: HR	26	Quarterly	300	2.5	62	2.43017	58.5	64.7	16.8	8000	10–21	7	19	3000	Moderate	Hybrid	0		https://journals.sagepub.com/home/adhr	Yes	1999	26	No	Focuses on conceptual and theoretical advancements in Human Resource Development (HRD) and organizational learning.	0.06	0.034	0.008	0.5	0.575	1	1	0	0	0.9	0
13	International Journal of Conflict Management	1758-8545	1758-8545	Entrepreneurship & Innovation	Social Sciences	Emrald	A	Q1	2.6	4.1	0.752	61	3.66	1 category: Conflict	31	Quarterly	450	8.9	65	2.43279	58.5	71.5	23.7	8000	10–21	22	0	3040	Lengthy	Hybrid	12		https://www.emeraldgrouppublishing.com/journal/ijcma	No	1994	31	No	Dedicated to research on the nature, causes, and consequences of conflict and its effective management in organizations.	0	0	0	0	0	1	0	0	0	0	0
11	Asia Pacific Management Review	2424-6215	2424-6215	Economics	Business, Management and Accounting	Elsevier		Q1	5.6	7.3	0.884	31	5.31	2 categories: Business + Regional	29	Quarterly	700	15	60	2.43284	61.1	42.1	11.4	8000	10–21	0	0	3800	Moderate		12		https://www.sciencedirect.com/journal/asia-pacific-management-review	No	1996	29	No	Focuses on management and organizational issues within the Asia Pacific region, covering diverse business and cultural contexts.	0.063	0.106	0.026	1	0	1	1	0	0	0.803	0
579	Electronic Commerce Research	1389-3577	1572-9362	Engineering & Technology	Economics, Econometrics and Finance	Springer	A	Q1	4.7	7.2	0.704	46	4.42	1 category: E-Commerce	24	Quarterly	700	15	62	2.43333	61.7	73	19.5	8000	10–21	22	0	4940	Moderate	Hybrid	12		https://link.springer.com/journal/10660	No	2001	24	No	Publishes research on electronic commerce, internet computing, and digital business models, emphasizing technological, organizational, and economic perspectives.	0.078	0	0	0	0	1	0	0	0	0.965	0
1	Aslib Journal of Information Management	2050-3806	2050-3814	Entrepreneurship & Innovation	Social Sciences	Emrald		Q1	3.1	3.9	0.475	46	3.05	2 categories: Management + Library Science	75	Quarterly	450	8.7	55	2.43571	70.6	58.1	18.4	8000	7–14	24	0	3380	Moderate	Hybrid	12		https://www.emeraldgrouppublishing.com/journal/ajim	No	1950	75	No	Focuses on information management, library science, and knowledge organization in all sectors.	0.071	0.082	0.085	1	0	1	0	0	0	0.997	0.966
277	Journal of International Business Policy	2522-0941	2522-095X	Business & Management (General)		Springer		Q1	4.4			37		1 category: Policy	7	Quarterly	700	15	75	2.43647	83.6	73.9	27.8	8000	21–45	0	0	3000	Moderate	Hybrid	0		https://www.palgrave.com/gp/journal/42214	No	2018	7	No	Focuses on the intersection of international business and public policy, addressing how firms and governments interact in the global economy.	0.06	0.075	0.023	0.75	0	1	0	1	0	0.779	0
589	Review of Quantitative Finance and Accounting	0924-865X	1573-0577	Business & Management (General)	Economics, Econometrics and Finance	Springer	B	Q2	2.1	3.2	0.553	49	1.94	1 category: Quantitative	33	Quarterly	700	15	75	2.43647	81.2	72.3	34.6	8000	21–45	6	0	3190	Moderate	Hybrid	0		https://link.springer.com/journal/11156	No	1992	33	No	Publishes research using quantitative methods in finance and accounting.	0.19	0.113	0.041	1	0.397	1	1	0	0	0.921	0
119	Cornell Hospitality Quarterly	1938-9663	1938-9663	Accounting & Finance	Business, Management and Accounting	Sage	A	Q1	3	6.1	1.178	88	4.78	Specialized	66	Quarterly	450	8.7	72	2.43982	60.8	68.4	23.9	9000	14–30	28	26	3200	Moderate	Hybrid	0		https://journals.sagepub.com/home/cqx	No	1959	66	No	Publishes research on the management and operations of the hospitality industry (hotels, restaurants, tourism), bridging academia and practice.	0.131	0	0	0	0.421	1	1	0	0	0	0
3	Journal of Systems and Information Technology	1328-7265	1758-8847	Business & Management (General)		Emrald	B	Q2		3.3	0.38	40		2 categories: IT + Management	20	Quarterly	400	6.7	52	2.44035	74.5	70.6	16.9	8000	7–14	41	0	4150	Easy	Hybrid	0		https://www.emeraldgrouppublishing.com/journal/jsit	No	2005	20	No	Focuses on research on information systems, information technology, and their strategic use and management.	0.09	0.108	0.045	1	0.389	1	0	0	0	0.997	0.986
157	Technology, Pedagogy and Education	1475-9395	1747-5139	Education Management	Computer Science	T&F			2.5		1.261	45	7.1	0	33	Triannual	450	8		2.44096	80.3	69.1	19.7	8000		73	150	3000	Moderate	Hybrid	0		https://www.tandfonline.com/journals/rtpe20	No	1992	33	No	Focuses on research on the intersection of technology, teaching methods (pedagogy), and education.	0.119	0.096	0.03	1	0	1	0	0	0	0.994	0.932
843	Journal of Financial Intermediation	1042-9573	1872-7361	Sustainability & Environmental Management	Economics, Econometrics and Finance	Elsevier	A*	Q1	3.7	7.1	5.384	87	5.44	1 category: Intermediation	34	Quarterly	500	10	50	2.44122	73.9	53.9	40.9	8000	10-15	3	6	1200	Moderate	Hybrid	0		https://www.sciencedirect.com/journal/journal-of-financial-intermediation	No	1991	34	No	Publishes theoretical and empirical research on financial intermediaries (banks, insurance companies, investment funds) and their role in the economy.	0.03	0.084	0.051	1	0.368	1	1	0	0	0.924	0.682
585	Public Choice	0048-5829	1573-7105	Economics	Social Sciences	Springer	A	Q1	2.2	3.2	0.591	90	1.62	Specialized	59	Quarterly	900	18	78	2.44137	60.8	72.7	16.7	8000	30–60	3	0	3090	Lengthy	Hybrid	0		https://link.springer.com/journal/11127	No	1966	59	No	Focuses on the application of economic methods to the study of non-market decision-making, such as political processes, voting, and bureaucracy.	0	0	0	0	0	1	1	0	0	0.912	0
260	Journal of Service Theory and Practice	2055-6233	2055-6233	Business & Management (General)	Business, Management and Accounting	Emrald	A	Q1	4.4	6.2	1.066	95	5.31	1 category: Service	14	Quarterly	450	8.6	72	2.4425	69.3	70.1	26.5	8000	14–30	38	0		Moderate		0		https://www.emeraldgrouppublishing.com/journal/jstp	No	2011	14	No	Publishes conceptual and empirical papers that advance service theory and its practical applications in various industries.	0.332	0.368	0.123	1	0.286	1	0	0	0	0.994	0
702	Education + Training	0040-0912	1758-750X	HRM & Organizational Behavior		Emrald		Q1	3.2		0.96			1 category: Training	66	Quarterly	600	12.6	65	2.44389	63.6	72	28.4	8000	10–21	71	0	1750	Moderate	Hybrid	12		https://www.emeraldgrouppublishing.com/journal/et	No	1959	66	No	Focuses on research related to education, training, and human resource development in vocational, professional, and corporate settings.	0.101	0.096	0.02	1	0.558	1	0	0	0	0.962	0
265	Organization Management Journal	1541-6516	1741-0304	Business & Management (General)		Emrald	C	Q2		1.9	0.22	25		1 category: Organization	21	Quarterly	350	4.6	70	2.44403	60.9	64	13.2	8000	14–30	27	0		Moderate	Diamond OA	0		https://www.emeraldgrouppublishing.com/journal/omj	No	2004	21	No	Publishes research on organizational theory, behavior, and management from various disciplinary perspectives.	0.138	0	0	0	0	1	1	0	0	0.941	0.932
754	Microelectronics International	1356-5362	1758-5426	Business & Management (General)	Physics and Astronomy	Emrald		Q4	8	1.8	0.203	23	1.1	1 category: Microelectronics	41	Quarterly	300	1.9	60	2.44464	82.1	69.4	19.5	8000	7–14	13	0	3200	Moderate	Hybrid	0		https://www.emeraldgrouppublishing.com/journal/mi	No	1984	41	No	Focuses on microelectronics, microchip technology, and applications, including integrated circuits (ICs), design, and manufacturing.	0.056	0	0	0	0	1	0	0	0	0.829	0
216	Asia-Pacific Journal of Business Administration	1757-4331	1757-4331	Sustainability & Environmental Management	Business, Management and Accounting	Emrald	C	Q1	4.6	4.9	0.693	24	5.3	2 categories: Business + Regional	16	Quarterly	450	8.4	60	2.44492	73.8	46.1	13.6	8000	7–14	44	0		Moderate		12		https://www.emeraldgrouppublishing.com/journal/apjba	No	2009	16	No	Focuses on business administration and management issues relevant to the Asia-Pacific region, emphasizing cross-cultural research.	0.116	0.166	0.073	1	0	1	1	0	0	0.788	0
169	Scandinavian Journal of Management	0956-5221	1873-1955	Business & Management (General)	Psychology	Elsevier	B	Q1	2.5	4.6	1.18	65	2.7	1 category: Management	41	Quarterly	500	10	72	2.44656	85.8	69.3	21.8	10000	14–30	8	22	3280	Lengthy	Hybrid	0		https://www.sciencedirect.com/journal/scandinavian-journal-of-management	No	1984	41	No	Publishes research on management, organizational studies, and business economics with a focus on Scandinavian and Northern European contexts.	0.108	0.087	0.022	1	0	1	1	0	0	0.932	0
466	Journal of Financial Reporting and Accounting	1985-2517		Business & Management (General)	Economics, Econometrics and Finance	Emrald	C	Q1	4.2	3.7	0.409	16	3.29	1 category: Reporting	22	Quarterly	700	14.5	65	2.44837	76.6	48.3	22.4	8000	10–21	35	0	2500	Moderate	Hybrid	0		https://www.emeraldgrouppublishing.com/journal/jfra	No	2003	22	No	Focuses on research on financial reporting, disclosure, and accounting standards, including their impact on decision-making.	0.078	0.07	0.029	0.75	0.447	1	1	0	0	0.838	0
470	Review of Behavioral Finance	1943-5157		Accounting & Finance	Economics, Econometrics and Finance	Emrald	B	Q2	1.8	2.7	0.396	17	2.97	Specialized	16	Quarterly	500	9.7	70	2.45423	49.3	72.3	21.5	8000	14–30	31	0	2500	Lengthy	Hybrid	0		https://www.emeraldgrouppublishing.com/journal/rbf	No	2009	16	No	Focuses on behavioral finance, economics, and investor psychology research.	0.052	0	0	0	0	1	1	0	0	0.882	0
694	Circuit World	0305-6120	1758-005X	Business & Management (General)	Engineering	Emrald		Q3	7	2.1	0.243	24	1.25	1 category: Circuit	51	Quarterly	300	1.5	60	2.4546	63.8	49.9	16.3	8000	7–14	32	0	2400	Moderate	Hybrid	0		https://www.emeraldgrouppublishing.com/journal/cw	No	1974	51	No	Publishes articles on the latest technology, manufacturing, and design of printed circuit boards (PCBs), assemblies, and electronic interconnects.	0.302	0.433	0.171	1	0.821	0.952	1	1	0	0.921	0.953
797	Water Management	1741-7589		Operations & Supply Chain	Environmental Science	Emrald			9	2.3	0.268	36	0.9	1 category: Water	3	Quarterly	800	16	70	2.45567	50.2	74.8	33.1	8000	14–30	151	0	4610	Lengthy	Hybrid	12		https://www.sciencedirect.com/journal/agricultural-water-management	No	2022	3	No	Covers research on water resources management, technology, policy, and infrastructure, including supply, quality, and governance.	0.134	0.094	0.059	1	0.481	1	1	0	0	0	0
976	Journal of Accounting in Emerging Economies	2042-1176	2042-1176	HRM & Organizational Behavior	Business, Management and Accounting	Emrald	B	Q1	3.8	4.4	0.543	23	3.65	1 category: Emerging	14	Quarterly	400	5.6		2.45634	57.1	73.3	25.6	8000		38	0	2500	Moderate	Hybrid	12		https://www.emeraldgrouppublishing.com/journal/jaee	No	2011	14	No	Focuses on accounting, finance, and governance issues within emerging economies.	0.172	0.3	0.159	1	0	1	0	0	0	0.959	0
179	Human Resource Development Review	1552-6712	1552-6712	Marketing	Business, Management and Accounting	Sage	B	Q2	4.6	8.9	1.739	56	5.55	1 category: HR Development	23	Quarterly	500	9.6	70	2.45695	66.5	68.7	23.1	8000	14–30	18	18	3500	Lengthy	Hybrid	12		https://journals.sagepub.com/home/hrd	No	2002	23	No	A premier journal publishing conceptual and theoretical reviews on all aspects of Human Resource Development (HRD) and learning.	0.205	0.231	0.124	1	0.226	0.952	1	1	0	0.979	0
764	South Asian Journal of Business Studies	2398-6399	2398-6402	Economics	Economics, Econometrics and Finance	Emrald	C	Q1	1.4	5.6	0.543	19	3.25	1 category: Business	13	Quarterly	400	6.1	62	2.45848	77.9	67.6	16.4	8000	10–21	49	0	2500	Moderate	Hybrid	12		https://www.emeraldgrouppublishing.com/journal/sajbs	No	2012	13	No	Publishes research on business, management, and economic issues relevant to the South Asian region.	0.03	0.022	0.008	0.75	0	1	1	0	0	0.932	0.838
666	Regulation & Governance	1748-5991	1748-5991	Entrepreneurship & Innovation		Wiley		Q1	3.8		2.12			2 categories: Regulation + Governance	18	Quarterly	600	12	75	2.46311	50.9	48.8	22.8	8000	21–45	5	0	4480	Lengthy	Hybrid	12		https://onlinelibrary.wiley.com/journal/17485991	Yes	2007	18	No	Focuses on the social, political, and legal implications of regulation and governance in various sectors globally.	0.011	0	0	0	0	1	0	0	0	0.976	0
445	Journal of Comparative Economics	0147-5967	1521-6971	Business & Management (General)	Economics, Econometrics and Finance	Elsevier	A	Q1	3.1	3.9	1.199	94	2.79	Specialized	48	Quarterly	600	12	75	2.46311	77	73	25.8	8000	21–45	0	0	3210	Moderate	Hybrid	0		https://www.sciencedirect.com/journal/journal-of-comparative-economics	No	1977	48	No	Focuses on comparative economic systems, institutional economics, and economic transition and development.	0	0	0	0.25	0	1	1	0	0	0	0
860	Ocean & Coastal Management	0964-5691	1879-1062	Strategy & International Business		Elsevier			5.4			98		1 category: Ocean	44	Monthly	1200	20		2.46334	72.7	76.7	44.2	8000		8	9		Moderate		0		https://www.sciencedirect.com/journal/ocean-and-coastal-management	No	1981	44	No	Focuses on integrated planning, policy, and management of marine and coastal environments and resources.	0.071	0.101	0.04	1	0	1	1	0	0	0.847	0
952	Environmental Management	0364-152X	1432-1009	Strategy & International Business	Environmental Science	Springer	C	Q1	3	6.1	0.862	135	3.42	2 category: Policy & Law	49	Quarterly	1200	20		2.46334	60	74.4	26.9	8000		7	0	4090		Hybrid	0		https://link.springer.com/journal/267	No	1976	49	No	A leading journal focusing on the application of scientific, legal, and economic knowledge to the solution of environmental problems.	0.063	0	0	0	0	1	1	0	0	0	0
722	International Journal of Social Economics	0306-8293	1758-6686	Business & Management (General)	Social Sciences	Emrald	B	Q2	1.7	2.6	0.412	44	1.93	Multi Category	51	Quarterly	600	11.9	65	2.46346	48.2	72	26.9	8000	10–21	50	0		Moderate		12		https://www.emeraldgrouppublishing.com/journal/ijse	No	1974	51	No	Publishes research on the intersection of economics, social justice, and ethics.	0	0	0	0	0	1	0	0	0	0.918	0
984	Managerial Auditing Journal	0268-6902	1758-6058	Engineering & Technology	Economics, Econometrics and Finance	Emrald	A	Q1	2.8	4.2	0.606	67	3.4	1 category: Auditing	39	Quarterly	500	8.7		2.46416	57.7	74.4	34.9	8000		45	0	3500	Moderate	Hybrid	12		https://www.emeraldgrouppublishing.com/journal/maj	No	1986	39	No	Publishes research on internal and external auditing, assurance, and corporate governance, with a managerial focus.	0.194	0.18	0.077	1	0.41	1	1	0	0	0.976	0.858
806	Defence Technology	2214-9142	2468-2178	Business & Management (General)	Materials Science	Elsevier		Q1	5.9	7.5	0.75	43	5.23	1 category: Defence	12	Quarterly	800	15		2.46763	64.9	74.1	26.9	8000		4	6	2800	Easy	Gold OA	0		https://www.sciencedirect.com/journal/defence-technology	Yes	2013	12	No	Publishes research on the science and technology underlying defense and security applications, including materials, sensing, and systems engineering.	0.082	0.075	0.041	0.75	0	1	1	0	0	0.974	0.973
857	Molecular and Cellular Neuroscience	1044-7434	1095-9533	Business & Management (General)		Elsevier		Q2	2.4		1.35	147		1 category: Neuroscience	32	Quarterly	800	15		2.46763	81.5	69.7	25.8	8000		2	5	3200	Moderate	Hybrid	12		https://www.sciencedirect.com/journal/molecular-and-cellular-neuroscience	No	1993	32	No	Publishes research on the molecular, cellular, and developmental aspects of the nervous system.	0.157	0.144	0.048	1	0.288	1	0	0	0	0	0.939
844	Journal of Financial Stability	1572-3089	1875-8179	Business & Management (General)	Economics, Econometrics and Finance	Elsevier	A	Q1	4.2	5.6	1.629	64	4.84	1 category: Stability	20	Quarterly	800	15		2.46763	51.8	74.1	37.6	10000		8	7	3200	Moderate	Hybrid	0		https://www.sciencedirect.com/journal/journal-of-financial-stability	No	2005	20	No	Publishes research on the stability and fragility of financial systems, covering crises, regulation, and systemic risk.	0	0	0	0	0	1	0	0	0	0	0
571	Sociological Methods & Research	0049-1241	1552-8296	Business & Management (General)		Sage	A		6.5			129		1 category: Methods	53	Quarterly	500	9.2	75	2.46904	74.9	72.7	16.4	8000	21–45	82	51	3900	Moderate	Hybrid	12		https://journals.sagepub.com/home/smr	No	1972	53	No	Focuses on new developments in social science methodology and quantitative research methods in sociology and related fields.	0	0	0	0.5	0	1	1	0	0	0	0
240	Journal of Asian Business and Economic Studies	2589-994X	2773-0486	Business & Management (General)		Emrald	B	Q1	3.6			17		2 categories: Business + Asia	12	Quarterly	400	5.7	68	2.47043	51.6	47.4	16.3	8000	14–28	27	0	4010	Moderate	Hybrid	12		https://www.emeraldgrouppublishing.com/journal/jabes	No	2013	12	No	Publishes research on business, management, and economic issues within the Asian region and its role in the global economy.	0.034	0.046	0.013	1	0.603	1	0	0	0	0.838	0
692	Construction Innovation: Information, Process, Management	1471-4175	1758-294X	Engineering & Technology		Emrald		Q1	3.5		1.08			0	24	Quarterly	800	14.9		2.47053	66	73	25.3	9000		58	0				12		https://www.emeraldgrouppublishing.com/journal/ci	No	2001	24	No	Focuses on innovation in the construction industry, covering IT adoption, process improvement, and management practices.	0	0	0	0	0	1	1	0	0	0.859	0
525	Studies in Economics and Finance	1476-5930	1758-6929	Business & Management (General)	Economics, Econometrics and Finance	Emrald	B	Q2	2	2.7	0.36	25	2.52	Specialized	45	Quarterly	400	5.7	70	2.47092	63.1	68.7	21.3	8000	14–30	16	0	3440	Moderate	Hybrid	0		https://www.emeraldgrouppublishing.com/journal/sef	No	1980	45	No	Publishes theoretical and empirical research on economics and finance topics.	0.164	0.197	0.073	1	0.415	1	0	0	0	0.885	0
1032	Australasian Marketing Journal	1441-3580	1839-7809	Sustainability & Environmental Management	Economics, Econometrics and Finance	Sage	A	Q1	3.8	13	1.811	49	7.69	1 category: Marketing	32	Quarterly	500	9	62	2.47129	69.7	78.7	42.1	8000	10–21	27	24	2900	Moderate	Hybrid	0		#N/A	No	1993	32	No	Focuses on marketing research and practice relevant to the Australasian region, covering consumer behavior and strategy.	0.086	0	0	0	0	1	0	0	0	0.912	0
888	Journal of Behavioral Finance	1542-7579	1555-5264	Public Administration & Policy	Economics, Econometrics and Finance	T&F	A	Q2	1.2	3.6	0.589	26	2.54	1 category: Behavioral	25	Quarterly	400	5		2.47196	48.6	73.7	24.3	8000		5	19	3500	Moderate	Hybrid	0		https://www.tandfonline.com/journals/rbf20	No	2000	25	No	Publishes research on the intersection of psychology, behavior, and financial decision-making and markets.	0.149	0.212	0.12	1	0	1	0	0	0	0.924	0.649
344	Journal of Management Education	1552-6658	1552-6658	Business & Management (General)	Business, Management and Accounting	Sage	B	Q1	2.6	3.4	0.627	55	1.65	2 categories: Management + Education	50	Quarterly	500	9	65	2.47203	86.1	68.7	20.1	8000	10–21	25	26	3500	Moderate	Hybrid	12		https://journals.sagepub.com/home/jme	No	1975	50	No	Dedicated to improving management teaching and learning through research on pedagogy, curriculum, and technology.	0.213	0.209	0.146	1	0.547	1	0	0	0	0.971	0.959
411	Action Research	1476-750X	1741-2684	Business & Management (General)	Social Sciences	Sage		Q1	2.1	4.5	0.715	44	1.89	1 category: Action Research	22	Quarterly	400	5.6	65	2.47231	79.1	69.6	23.1	8000	10–21	23	25	3200	Moderate	Hybrid	0		https://journals.sagepub.com/home/arja	No	2003	22	No	Dedicated to research on action research methodology and its application in organizational and social change.	0.123	0.159	0.07	1	0	0.952	1	1	0	0.985	0.953
134	The Journal of Risk Finance	1526-5943		Marketing		Emrald	B		4.7			45		1 category: Risk Finance	25	Bimonthly	450	7.4	65	2.47284	67.1	69.3	17.9	8000	10–21	31	0	3400	Moderate	Hybrid	0		https://www.emeraldgrouppublishing.com/journal/jrf	No	2000	25	No	A premier journal publishing theoretical and empirical research on financial economics, corporate finance, and capital markets.	0.045	0	0	0	0	1	0	0	0	0.994	0
497	Journal of Behavioral Decision Making	0894-3257	1099-0771	Business & Management (General)	Arts and Humanities	Wiley	A	Q1	1.4	4.5	0.822	87	2.46	1 category: Decision	37	Quarterly	500	9	70	2.47326	75.6	72	10.9	8000	14–30	2	0	3700	Moderate	Hybrid	12		https://onlinelibrary.wiley.com/journal/10990771	No	1988	37	No	Publishes research on human judgment and decision-making, often integrating psychological, economic, and managerial perspectives.	0.164	0.149	0.06	1	0	1	1	0	0	0.926	0.98
853	Journal of Rail Transport Planning & Management	2210-9792		Business & Management (General)		Elsevier		Q1	2.7	2	1.02			1 category: Rail	13	Quarterly	300			2.47712	47.5	58.3	36.8	8000		19	11	2540	Easy		0		https://www.sciencedirect.com/journal/journal-of-rail-transport-planning-and-management	No	2012	13	No	Publishes research on the planning, management, policy, and economics of rail transport systems.	0.328	0.298	0.074	1	0.432	1	1	0	0	0.991	1
832	Journal of Climate Finance		2949-7280	Accounting & Finance		Elsevier		Q1		2.8		9		1 category: Climate	2	Quarterly	300			2.47712	84.6	78.7	41.3	12000		4	6	4760	Easy	Gold OA	12		https://www.sciencedirect.com/journal/journal-of-climate-finance	No	2023	2	No	Focuses on research on financial mechanisms, investment, and policy related to climate change mitigation and adaptation.	0.201	0	0	0	0.38	1	0	0	0	0.944	1
802	Carbon Capture Science & Technology		2772-6803	Entrepreneurship & Innovation		Elsevier		Q1	10.5	4.5		9		1 category: Carbon	4	Quarterly	300			2.47712	69.6	51.7	16.8	8000		0	11	3000	Moderate	Gold OA	0		https://www.sciencedirect.com/journal/carbon-capture-science-and-technology	No	2021	4	No	Publishes research on all aspects of carbon capture, utilization, and storage (CCUS) technologies, science, policy, and economics.	0.112	0.075	0.016	1	0	1	1	0	0	0.868	0
949	Journal of International Entrepreneurship	1573-7349	1573-7349	Strategy & International Business	Business, Management and Accounting	Springer		Q2	2.9	6.1	0.943	53	3.93	1 category: International	22	Quarterly	300			2.47712	70.8	72.6	29.7	8000		47	0	2720	Moderate	Hybrid	12		https://link.springer.com/journal/10843	No	2003	22	No	Focuses on research on entrepreneurship in the international context, including opportunity identification, international new ventures, and global growth.	0.075	0.089	0.047	0.75	0.417	1	0	0	0	0.982	0
817	Global Finance Journal	1044-0283	1878-8317	Entrepreneurship & Innovation	Economics, Econometrics and Finance	Elsevier	A	Q1	5.5	5	0.775	41	5.03	1 category: Finance	36	Quarterly	300			2.47712	61	71.6	24.9	8000		3	3	3100	Moderate	Hybrid	12		https://www.sciencedirect.com/journal/global-finance-journal	No	1989	36	No	Publishes original research on global finance, international financial markets, and multinational corporate finance.	0.16	0.115	0.038	1	0.532	1	1	0	0	0.991	0.966
301	Social and Emotional Learning: Research, Practice, and Policy		2731-1033	HRM & Organizational Behavior		Elsevier						12		0	4	Quarterly	300			2.47712	49.8	66.4	17.5	8000		0	0	2900		Gold OA	0		https://www.sciencedirect.com/journal/social-and-emotional-learning-research-practice-and-policy	No	2021	4	No	Focuses on the research, implementation, and policy related to social and emotional learning (SEL) in educational and community settings.	0.041	0	0	0	0	1	0	0	0	0.685	0
809	Economics of Transportation	2212-0993		Sustainability & Environmental Management	Economics, Econometrics and Finance	Elsevier	B	Q1	1.7	5.1	1.158	24	2.81	2 categories: Economics + Transport	13	Quarterly	300			2.47712	65.2	74.8	29.4	8000		0	0	3300		Hybrid	24		https://www.sciencedirect.com/journal/economics-of-transportation	No	2012	13	No	Dedicated to research on the economic analysis, policy, and management of transportation systems.	0.228	0.195	0.186	1	0.38	1	0	0	0	0.879	0
912	Process Science		2971-4198	Marketing		Springer		Q3			0.15			1 category: Process	1	Quarterly	300			2.47712	55.4	49.4	17.1	8000		0	0	2900	Easy	Gold OA	0		#N/A	Yes	2024	1	No	A general scope covers the scientific study, modeling, and optimization of processes in various domains (e.g., business, engineering).	0.246	0.257	0.087	1	0	1	1	0	0	0.965	0
820	Healthcare Analytics		2772-763X	Information Systems & Digital Business		Elsevier		Q1		3.2		5		2 categories: Health + Analytics	2	Quarterly	300			2.47712	75.6	55	15.2	8000		3	6	1030	Easy	Gold OA	0		https://www.sciencedirect.com/journal/healthcare-analytics	Yes	2023	2	No	Covers the application of analytical methods and technologies (AI, ML, statistics) to healthcare data to improve clinical care, operations, and public health outcomes.	0.325	0.409	0.299	1	0.156	0.905	0	1	0	0.988	0.932
840	Journal of Economy and Technology		2949-9488	Economics		Elsevier								2 categories: Economy + Technology	2	Quarterly	300			2.47712	46.1	79.8	34.5	9000		0	4		Easy		12		https://www.sciencedirect.com/journal/journal-of-economy-and-technology	No	2023	2	No	Likely covers the economic analysis of technological change, innovation, R&D, and the market dynamics of high-tech industries.	0.123	0.091	0.017	1	0	0.976	1	1	0	0.688	0
904	Latin American Journal of Central Banking	2666-489X		Entrepreneurship & Innovation		Elsevier		Q3	1.3		0.54			1 category: Banking	5	Quarterly	300			2.47712	44.1	65.8	20.1	8000		0	23	1600	Easy	Gold OA	0		#N/A	No	2020	5	No	Focuses on research on monetary policy, financial stability, and macroeconomic issues relevant to Latin American central banks.	0.127	0.065	0.036	1	0.506	1	0	0	0	0.921	0
994	China Journal of Accounting Research	1755-3094	1755-3108	Business & Management (General)	Economics, Econometrics and Finance	Elsevier	B	Q2	4	4	0.88	22	3.48	1 category: China	17	Quarterly	300			2.47712	61.7	74.4	24.8	8000		9	0		Easy		0		https://www.sciencedirect.com/journal/china-journal-of-accounting-research	No	2008	17	No	Focuses on accounting research related to China's economy, financial markets, and regulatory environment.	0.071	0.082	0.023	0.75	0	1	1	0	0	0.812	0
896	Nonlinear Science		3050-5178	Marketing		Elsevier								1 category: Nonlinear	34	Quarterly	300			2.47712	80.1	62.2	19.2	8000		0	0						Manual search needed	Yes	1991	34	No	A broad term for journals covering nonlinear phenomena, systems, and dynamics across physics, biology, engineering, and mathematics.	0.082	0.053	0.024	1	0	0.976	1	0	0	0.794	0.905
132	Journal of Educational Administration	0957-8234	1758-8684	Economics	Social Sciences	Emrald	B	Q1	2	3.6	0.975	66	2.26	2 categories: Education + Admin	62	Bimonthly	500	8.8	70	2.47869	82.6	68	20.4	8000	14–30	25	0		Lengthy		0		https://www.emeraldgrouppublishing.com/journal/jea	No	1963	62	No	Focuses on research related to educational administration, leadership, and policy in educational systems.	0.25	0.252	0.129	1	0	1	1	0	0	0.982	1
586	Quality & Quantity	0033-5177	1573-7849	Business & Management (General)		Springer	B	Q1	1.072		1.02	71		2 categories: Quality + Quantity	58	Quarterly	1200	20	65	2.47936	58.6	70.4	32.4	8000	10–21	22	0		Moderate		12		https://link.springer.com/journal/11135	No	1967	58	No	An interdisciplinary journal for methodology and application of quantitative and qualitative methods in the social sciences.	0.075	0.096	0.029	0.75	0.618	1	0	0	0	0.829	0
473	Journal of Vascular Surgery	0741-5214	1097-6801	Engineering & Technology	Medicine	Elsevier		Q1	3.6	7.1	2.027	210	2.93	1 category: Vascular	41	Quarterly	1200	20	70	2.48059	53.9	74.1	16.8	8000	14–30	0	0	4090	Moderate	Hybrid	12		https://www.jvascsurg.org	No	1984	41	No	Publishes research on the diagnosis, pathology, and management of diseases of the arteries, veins, and lymphatic circulation.	0.108	0.132	0.045	1	0.581	1	0	0	0	0.974	0.831
387	Journal of Archaeological Science	0305-4403	1095-9231	Tourism & Hospitality	Arts and Humanities	Elsevier		Q1	2.5	5.7	1.218	144	2.87	1 category: Archaeology	51	Monthly	1200	20	70	2.48059	61.6	74.1	26.8	8000	14–30	5	10	4000	Lengthy	Hybrid	0		https://www.sciencedirect.com/journal/journal-of-archaeological-science	No	1974	51	No	Publishes research on the application of scientific methods to archaeological problems.	0.269	0.32	0.184	1	0	0.952	1	1	0	0.906	0
1020	Tourism Management Perspectives	2211-9744	2211-9744	Business & Management (General)	Business, Management and Accounting	Elsevier	A	Q1	6.9	12.8	1.92	69	10.48	Specialized	13	Bimonthly	1200	20	72	2.48108	83.7	76.7	37.4	8000	14–30	8	9	5490	Moderate		12		#N/A	No	2012	13	No	A rapid-publication journal for applied, practitioner-focused research in tourism, travel, and hospitality management.	0.101	0.111	0.069	1	0	1	0	0	0	0.991	0.966
1038	International Journal of Project Management	0263-7863	1873-4638	Business & Management (General)	Environmental Science	Elsevier	A	Q1	7.5	12.7	2.333	167	8.32	1 category: Project	42	Bimonthly	1200	20	75	2.48182	77.5	73	44.8	8000	21–45	6	2		Moderate		0		#N/A	No	1983	42	No	Publishes high-quality, impactful papers that advance the theory and practice of project management internationally.	0.187	0	0	0	0	1	1	0	0	0.985	0.946
598	Business & Information Systems Engineering	1867-0202	1867-0210	Education Management		Springer	A	Q1	10.4	6.4		129		2 categories: Business + IT	16	Quarterly	800	15	68	2.48441	67.6	74.4	26.3	8000	14–28	22	0	3290	Moderate	Hybrid	0		https://link.springer.com/journal/12599	No	2009	16	No	Focuses on research on information systems engineering, business process management, and digital transformation.	0.209	0.185	0.049	1	0	1	0	0	0	0.921	0
649	International Transactions in Operational Research	1475-3995	1475-3995	Business & Management (General)	Decision Sciences	Wiley	B	Q1	2.9	7.6	1.059	61	4.56	1 category: Operations	31	Quarterly	800	15	72	2.48539	62.5	70.4	27.6	8000	14–30	12	0	3230	Moderate	Hybrid	12		https://onlinelibrary.wiley.com/journal/14753995	No	1994	31	No	Publishes research on the theory, methodology, and applications of operational research (OR) and management science.	0	0	0	0	0	1	0	0	0	0.988	0.966
67	Review of Managerial Science	1863-6691	1863-6691	Business & Management (General)	Business, Management and Accounting	Springer		Q1	9.6	8.7	1.312	41	6.36	1 category: Management	18	Quarterly	800	15	72	2.48539	50.1	69.3	22.7	8000	14–30	5	0	3790	Lengthy	Hybrid	0		https://link.springer.com/journal/11846	No	2007	18	No	Publishes empirical, theoretical, and methodological articles that contribute to the theory and practice of management science, covering all business functions.	0.082	0.084	0.024	0.75	0	1	0	0	0	0.874	0
1014	International Journal of Forecasting	1872-8200	1872-8200	Marketing	Business, Management and Accounting	Elsevier	A	Q1	7.1	12	1.972	110	7.52	1 category: Forecasting	40	Quarterly	800	15	72	2.48539	82.4	78	41.2	8000	14–30	7	0		Moderate		0		#N/A	Yes	1985	40	No	The leading journal dedicated to all aspects of forecasting, including theory, methodology, practice, and applications in business, economics, and social sciences.	0	0	0	1	0	1	0	0	0	0.838	0
201	Journal of International Financial Management & Accounting	0953-5791	1467-646X	Business & Management (General)		Wiley		Q2	8.2	3.4		32		Specialized	36	Quarterly	350	3	72	2.48551	53	69.9	19.3	8000	14–30	19	0	2970	Lengthy		0		https://onlinelibrary.wiley.com/journal/1467646X	No	1989	36	No	Publishes high-quality research on financial management and accounting issues in an international context, including global reporting standards and multinational corporations.	0.25	0	0	0	0	1	1	0	0	0.988	0.932
543	Water Resources Research	0043-1397	1944-7973	Sustainability & Environmental Management	Environmental Science	Wiley	A	Q1	5	8.8	1.715	248	5.16	1 category: Water	60	Quarterly	3000	29	70	2.48604	68	75.1	25.2	9000	14–30	65	0	3630	Lengthy		12		https://agupubs.onlinelibrary.wiley.com/journal/19447973	No	1965	60	No	Publishes fundamental and interdisciplinary research on hydrology, water resources, and the physical, chemical, and biological processes of water in the Earth system.	0.317	0.31	0.12	1	0	0.952	1	1	0	0.971	0.331
142	Food Policy	0306-9192	1873-7059	Business & Management (General)	Agricultural and Biological Sciences	Elsevier	B	Q1	6	9.9	1.896	126	6.99	Multi Category	49	Monthly	800	15	75	2.48613	55.5	72	23.4	8000	21–45	15	14	3950	Lengthy	Hybrid	12		https://www.sciencedirect.com/journal/food-policy	No	1976	49	No	Focuses on economic, political, social, and environmental aspects of food policy, including food security, trade, and regulation.	0.078	0.072	0.022	0.75	0.63	1	0	0	0	0.862	0
510	Career Development International	1362-0436	1758-5876	Sustainability & Environmental Management	Social Sciences	Emrald	B	Q1	4.1	4	0.72	73	3.12	1 category: Career	29	Quarterly	500	8.5	68	2.48635	46.7	70.1	15.9	8000	14–28	46	0	2500	Moderate	Hybrid	0		https://www.emeraldgrouppublishing.com/journal/cdi	No	1996	29	No	Publishes research on career development, vocational behavior, and career management in organizational and individual contexts.	0.175	0	0	0	0	1	0	0	0	0.85	0
102	ESMO Real World Data and Digital Oncology	2949-8043		Public Administration & Policy		Elsevier						9		2 categories: Oncology + Health Informatics	5	Quarterly	300		45	2.48827	63.2	73	9.2	8000	5–10	0	0	4420	Moderate	Gold OA	0		https://www.sciencedirect.com/journal/esmo-real-world-data-and-digital-oncology	No	2020	5	No	Focuses on the use of Real World Data (RWD) and digital technologies (e.g., AI, telehealth) in oncology for research and patient care.	0	0	0	0.75	0	1	0	0	0	0.991	0
729	Journal of Business & Industrial Marketing	0885-8624	1758-2990	Business & Management (General)		Emrald	A		4.3			98		1 category: B2B	39	Quarterly	800	14.9	72	2.48832	48	71.6	20.8	8000	14–30	66	0	2760	Moderate	Hybrid	12		https://www.emeraldgrouppublishing.com/journal/jbim	No	1986	39	No	Dedicated to business-to-business (B2B) marketing, covering strategy, relationships, technology, and organizational buying.	0	0	0	0	0	1	0	0	0	0.826	0
246	Journal of Economics and Development	1405-5919		Business & Management (General)		Emrald		Q1	4.3			15		Specialized	6	Quarterly	400	5	70	2.48926	60.2	41.7	11.8	8000	14–30	30	0	2500	Lengthy	Hybrid	0		https://www.emeraldgrouppublishing.com/journal/jed	No	2019	6	No	Publishes research on economic theory and development issues, including growth, inequality, and sustainable economic policy.	0.201	0	0	0	0.051	1	1	0	0	0.85	0
562	International Journal of Business Communication	2329-4885	2329-4893	Economics	Economics, Econometrics and Finance	Sage	C	Q1	3.1	5.8	0.851	58	3.1	2 categories: Business + Communication	90	Quarterly	600	11	70	2.48986	55.9	69.7	30.9	8000	14–30	10	27		Moderate		12		https://journals.sagepub.com/home/job	No	1935	90	No	Publishes research on business communication theory, practice, and instruction in global, organizational, and technical contexts.	0.119	0.142	0.04	1	0	1	0	0	0	0.856	0
45	Journal of Shipping and Trade	2366-5683	2366-5691	Business & Management (General)		Springer		Q1		3.8	0.6			1 category: Shipping	9	Quarterly	300		55	2.49075	60.3	65.5	10.9	8000	7–14	8	0	1790	Moderate	Gold OA	12		#N/A	No	2016	9	No	Focuses on research on the economics, management, and logistics of the shipping and maritime trade industry.	0.123	0.123	0.038	1	0.451	1	0	0	0	0.788	0
638	Disasters	0361-3683	1467-7717	Operations & Supply Chain	Earth and Planetary Sciences	Wiley	A	Q1	2.6	6	0.831	78	3.13	2 category: Policy & Law	48	Quarterly	600	11	75	2.4911	52.2	72.3	24.6	8000	21–45	7	0	4150	Lengthy	Hybrid	12		https://onlinelibrary.wiley.com/journal/14677717	No	1977	48	No	An international journal focusing on the science, policy, and management of natural and human-made disasters.	0.09	0.043	0.012	0.75	0	1	0	0	0	0.662	0
628	Discover Analytics	2773-0184		Business & Management (General)		Springer								1 category: Analytics	3	Quarterly	300		58	2.49149	50.7	71.6	28.1	8000	7–14	0	0		Easy		12		https://link.springer.com/journal/44257	No	2022	3	No	An open-access journal covering all areas of data science and analytics, focusing on methods, tools, and applications for real-world problems.	0	0	0	0	0.256	1	0	0	0	0	0
109	JVS-Vascular Science	2474-4209	2474-4217	Education Management		Elsevier		Q2	2			8		1 category: Vascular	5	Quarterly	300		58	2.49149	65.1	67.9	13.8	8000	7–14	0	0	4170	Moderate	Gold OA	0		https://www.sciencedirect.com/journal/jvs-vascular-science	No	2020	5	No	A specialized journal focusing on research and clinical advancements in vascular science and surgery.	0.045	0	0	0	0	1	0	0	0	0.815	0
281	Food and Humanity		2772-6633	Economics		Elsevier		Q2		3.6		8		Specialized	3	Quarterly	300		58	2.49149	79.1	68.4	22.9	16750	7–14	8	4	3540	Moderate		0		https://www.sciencedirect.com/journal/food-and-humanity	No	2022	3	No	Dedicated to the interface between food, society, and human well-being, likely covering sustainable food systems, ethics, health, and cultural aspects of food.	0	0	0	0	0	1	1	0	0	0	0
247	Journal of Entrepreneurship in Emerging Economies	2053-563X	2394-9852	Sustainability & Environmental Management	Economics, Econometrics and Finance	Emrald	C	Q1	3	6.5	0.824	28	5.87	2 categories: Entrepreneurship + Emerging	16	Quarterly	500	8.3	68	2.49179	58.1	44.1	15.4	8000	14–28	26	0	2500	Moderate	Hybrid	12		https://www.emeraldgrouppublishing.com/journal/jeee	No	2009	16	No	Focuses on research on entrepreneurship and innovation specifically within the context and challenges of emerging market economies.	0.078	0.132	0.038	1	0.513	1	0	0	0	0	0
492	Systemic Practice and Action Research	1573-9295	1573-9295	Engineering & Technology	Business, Management and Accounting	Springer	B	Q3	1.6	2.9	0.387	38	1.85	1 category: Systemic	37	Quarterly	300		60	2.49198	63.2	69.1	16.5	8000	7–14	9	0	4220	Moderate	Hybrid	12		https://link.springer.com/journal/11213	No	1988	37	No	Focuses on research that combines systems thinking, action research, and participatory methods for organizational and social change.	0.082	0.091	0.023	0.75	0.432	0.952	1	1	0	0.991	0
603	Sales Excellence	2319-1228		Economics		Springer								1 category: Sales		Quarterly	300		60	2.49198	47.2	67.6	23.8	8000	7–14	0	0		Moderate		12		https://link.springer.com/journal/35147	No			No	Focuses on research and practice related to sales management, performance, and strategy.	0.063	0.077	0.019	0.75	0	1	0	0	0	0.985	0
332	Current Opinion in Insect Science	2214-5747		Engineering & Technology	Agricultural and Biological Sciences	Elsevier		Q1	6.4	9.5	1.589	58	4.88	1 category: Entomology	11	Quarterly	300		60	2.49198	63	72.7	15.4	8000	7–14	0	0		Moderate		0		https://www.sciencedirect.com/journal/current-opinion-in-insect-science	No	2014	11	No	A systematic review journal that summarizes and evaluates the latest research in insect science, covering ecology, genomics, pests, and medical entomology.	0	0	0	0	0.229	1	0	0	0	0	0
210	Journal of Sustainable Finance and Accounting	2053-4856		Healthcare Management		Elsevier						10		2 categories: Finance + Sustainability		Quarterly	300		65	2.49322	52	68.3	17.4	8000	10–21	0	0	2900	Moderate	Hybrid	12		https://www.emeraldgroup.com/journal/jsfa	No			No	Publishes research on accounting, reporting, and financial strategies related to sustainability and ESG.	0.078	0.06	0.013	0.75	0.353	1	0	0	0	0.968	0
596	Journal of Transportation Security	1934-8761	1934-877X	HRM & Organizational Behavior	Social Sciences	Springer	B	Q2	1.6	2.7	0.268	16	1.48	1 category: Security	17	Quarterly	300		65	2.49322	75.2	68.7	28.8	9000	10–21	10	0	4230	Moderate	Hybrid	12		https://link.springer.com/journal/12198	No	2008	17	No	Focuses on the security of transportation systems, including aviation, maritime, rail, and road, covering policy, technology, and threat assessment.	0.026	0.017	0.01	0.5	0	1	1	0	0	0.929	0
608	Customer Needs and Solutions	2213-4330	2213-4349	Business & Management (General)		Springer	B							1 category: Customer	11	Quarterly	300		65	2.49322	65.3	71.6	14.7	8000	10–21	6	0	3090	Moderate	Hybrid	0		https://link.springer.com/journal/40547	No	2014	11	No	Focuses on research related to understanding customer needs, value creation, and developing business solutions.	0	0	0	0.75	0	1	1	0	0	0.912	0.804
578	Computational and Mathematical Organization Theory	1572-9346	1572-9346	Entrepreneurship & Innovation	Decision Sciences	Springer		Q2	1.5	6.3	0.595	31	1.85	2 categories: Computational + Org	30	Quarterly	300		65	2.49322	67.9	68.7	27.1	8000	10–21	26	0	3290	Moderate	Hybrid	0		https://link.springer.com/journal/10588	No	1995	30	No	Publishes research using computational, mathematical, and simulation models to study organizations and management processes.	0	0.425	0.143	1	0	1	0	1	0	0	0
758	Marketing Strategy Journal		2950-3086	Business & Management (General)		Elsevier								1 category: Strategy	2	Quarterly	300		68	2.49397	46.1	46.9	13.6	8000	14–28	0	0		Moderate		12		https://www.emeraldgrouppublishing.com/journal/msj	No	2023	2	No	Focuses on research relevant to marketing strategy development and implementation in diverse organizational and market contexts.	0.328	0.32	0.145	1	0	1	1	0	0	0.921	0
618	Operations Research Forum	2730-674X		Operations & Supply Chain		Springer		Q2		2.3	0.22	14		1 category: Operations	5	Quarterly	300		68	2.49397	62.6	72.7	20.8	8000	14–28	11	0	3090	Moderate	Hybrid	12		https://link.springer.com/journal/43069	No	2020	5	No	Publishes original research and review articles on all areas of Operations Research (OR) and optimization theory.	0.082	0.089	0.039	0.75	0	0.976	0	0	0	0.982	0.885
421	TOP	1863-8279	1863-8279	Engineering & Technology	Decision Sciences	Springer		Q2	1.4	2.7	0.671	29	1.88	1 category: Optimization	32	Quarterly	300		68	2.49397	46.8	70.1	19.3	8000	14–28	6	0	3290	Moderate	Hybrid	0		https://link.springer.com/journal/11767	No	1993	32	No	A journal dedicated to Optimization and Operational Research methods and applications.	0	0	0	0	0	1	1	0	0	0.979	0
442	Corporate Reputation Review	1479-1889	1479-1889	Accounting & Finance	Business, Management and Accounting	Springer	C	Q2	1.6	3	0.462	69	2.5	1 category: Reputation	27	Quarterly	300		68	2.49397	72.4	69.6	22.9	10000	14–28	46	0	3190	Moderate	Hybrid	12		https://www.palgrave.com/gp/journal/41299	No	1998	27	No	Focuses on research on corporate reputation, image, branding, and stakeholder communication.	0.104	0.159	0.082	1	0	1	1	0	0	0.988	0.993
613	Journal of Organization Design	2243-7629	2243-7637	Healthcare Management		Springer		Q3	1.7		1.12	20		1 category: Design	10	Quarterly	300		68	2.49397	51	73	15.3	8000	14–28	35	0	3200	Moderate		12		https://link.springer.com/journal/41469	No	2015	10	No	Focuses on research on the theory and practice of organizational design and structuring.	0.112	0.089	0.092	1	0.519	1	0	0	0	0.976	0.966
673	Progress in Economic Geography	2755-0826	2755-0834	Economics		Elsevier								Specialized	3	Quarterly	300		68	2.49397	71	73.3	25.4	8000	14–28	0	0		Moderate		0		https://onlinelibrary.wiley.com/journal/25731997	No	2022	3	No	Dedicated to advancing theoretical, empirical, and methodological research in economic geography, examining the spatial organization of economic activity.	0.071	0.065	0.015	0.75	0	1	0	0	0	0.982	0
53	Transport Economics and Management	2772-911X	2772-9128	Business & Management (General)		Elsevier						15		Multi Category	10	Quarterly	300		68	2.49397	55.5	63.1	15.8	8000	14–30	0	6	810	Lengthy	Gold OA	12		https://www.sciencedirect.com/journal/transport-economics-and-management	No	2015	10	No	Focuses on research on the economics, regulation, and management of the transport sector.	0	0	0	1	0.891	1	1	0	0	0.979	0.959
796	Agricultural Water Management	0378-3774	1873-2285	Business & Management (General)	Earth and Planetary Sciences	Elsevier		Q1	6.5	10.7	1.524	152	7.21	1 category: Water	49	Monthly	2000	25	75	2.49434	79.4	68.3	12.7	8000	21–45	4	7		Moderate		0		https://www.sciencedirect.com/journal/agricultural-water-management	No	1976	49	No	Publishes research on water-saving irrigation practices, water-use efficiency, and integrated water resource management in agriculture.	0	0	0	1	0	1	0	0	0	0.815	0
789	The Geneva Risk and Insurance Review	1555-5558	1555-9065	Engineering & Technology		Springer	B	Q2	1		0.85			1 category: Risk	20	Quarterly	300		70	2.49446	83.3	63.4	9.8	8000	14–30	19	0	3000	Moderate	Hybrid	12		https://www.palgrave.com/gp/journal/10713	No	2005	20	No	Publishes high-quality research on risk, insurance, and finance, often with a focus on quantitative models and policy.	0.164	0.207	0.099	0.75	0	0.952	1	0	0	0.95	0.892
528	Japan and the World Economy	0922-1425	1872-6802	Business & Management (General)	Social Sciences	Elsevier	B	Q1	1.2	2.9	0.55	38	1.58	Specialized	38	Quarterly	300		70	2.49446	60.3	51.7	28.9	8000	14–30	12	5	2630	Lengthy	Hybrid	24		https://www.sciencedirect.com/journal/japan-and-the-world-economy	No	1987	38	No	Publishes research on the Japanese economy and its relationship with the global economy, covering trade, finance, and policy.	0.082	0.07	0.021	0.75	0	1	0	0	0	0.959	0
149	Journal of Choice Modelling	1755-5345	1755-5345	Business & Management (General)	Decision Sciences	Elsevier	B	Q1	2.4	5.7	1.186	35	2.55	Specialized	15	Quarterly	300		72	2.49496	81	68.4	16.4	8000	14–30	11	14	2710	Moderate		12		https://www.sciencedirect.com/journal/journal-of-choice-modelling	No	2010	15	No	Focuses on the theory, methodology, and application of choice models (e.g., discrete choice) in various fields.	0.063	0	0	0	0	1	1	0	0	0.853	0
290	Journal of Economic Criminology	2214-6352	2214-6352	Information Systems & Digital Business		Elsevier						12		Specialized	4	Quarterly	300		72	2.49496	82.9	67.6	16.8	8000	14–30	2	5	2700	Lengthy	Gold OA	12		https://www.sciencedirect.com/journal/journal-of-economic-criminology	No	2021	4	No	Focuses on economic crimes and their impact, likely covering topics at the intersection of economics, finance, law, and criminal behavior.	0.146	0	0	0	0	1	0	0	0	0.912	0
454	Journal of Public Affairs	1472-3891	1479-1856	Business & Management (General)	Social Sciences	Wiley	B	Q1	1.8	4.1	0.562	33	4.15	2 categories: Public + Affairs	24	Quarterly	500	8	62	2.49845	74.9	67.6	18.6	8000	10–21	10	0	3460	Moderate	Hybrid	0		https://onlinelibrary.wiley.com/journal/14791854	No	2001	24	No	Publishes research on public affairs, corporate social responsibility, and the relationship between business and society/government.	0.119	0.151	0.056	1	0	1	1	0	0	0.974	0.946
774	Construction Materials	1748-0388		Business & Management (General)		Emrald		Q2	1.2			8		1 category: Materials	2	Quarterly	500	8	62	2.49845	82.6	68.3	19.8	8000	10–21	165	0	1000	Moderate	Gold OA	0		https://www.icevirtuallibrary.com/journal/jcoma	No	2023	2	Yes	Publishes research on the materials science, properties, and performance of construction materials.	0.078	0	0	0	0.368	1	1	0	0	0.968	0.892
502	Australian Accounting Review	1835-2561	1835-2561	Healthcare Management	Business, Management and Accounting	Wiley	B	Q2	3.3	6.5	0.758	43	2.94	1 category: Accounting	34	Quarterly	500	8	68	2.49994	50.2	48.8	20.1	8000	14–28	24	0	2920	Moderate	Hybrid	0		https://onlinelibrary.wiley.com/journal/18352561	No	1991	34	No	Focuses on research and professional debate on accounting and financial reporting issues relevant to Australia and international contexts.	0	0	0	0.75	0	1	1	0	0	0.968	0
827	International Review of Economics & Finance	1058-291X	1873-8178	Business & Management (General)		Elsevier	A		5.6			87		1 category: Finance	33	Quarterly	900	15		2.51111	46.8	56.1	35.4	8000		20	2		Moderate		0		https://www.sciencedirect.com/journal/international-review-of-economics-and-finance	No	1992	33	No	Publishes research that addresses the intersection of economics and finance in areas like monetary policy, trade, and financial markets.	0.153	0	0	1	0	1	0	0	0	0.915	0
715	The International Journal of Logistics Management	0957-4093	1758-3776	Business & Management (General)		Emrald	A		6.4			98		1 category: Logistics	35	Quarterly	600	10.2	72	2.51274	80.8	74.8	31.2	8000	14–30	45	0	2500	Lengthy	Hybrid	0		https://www.emeraldgrouppublishing.com/journal/ijlm	Yes	1990	35	No	Publishes research on logistics management, supply chain management, and physical distribution with an international and global scope.	0	0	0	0	0.348	1	0	0	0	0.888	0
633	The Journal of Futures Markets	0270-7314	1096-9937	Sustainability & Environmental Management		Wiley	A	Q1	2.3		1.08			1 category: Futures	44	Quarterly	800	14	70	2.51413	77.5	74.1	31.6	8000	14–30	26	0	2630	Lengthy	Hybrid	0		https://onlinelibrary.wiley.com/journal/10969934	No	1981	44	No	Publishes research on futures, options, and other derivative markets, covering pricing, hedging, and regulation.	0	0	0	0	0	1	1	0	0	0.926	0
667	Financial Management	0047-200X	1755-6689	Business & Management (General)	Economics, Econometrics and Finance	Wiley	A	Q1	6	5.2	1.735	75	3.11	1 category: Finance	53	Quarterly	800	14	78	2.51613	82.9	74.8	31.5	8000	30–60	34	0	3500	Moderate	Hybrid	12		https://onlinelibrary.wiley.com/journal/1755053X	No	1972	53	No	Focuses on theoretical and applied research in all areas of financial management within corporate and non-profit organizations.	0.022	0	0	0	0.81	1	1	0	0	0.932	0
690	Cross Cultural & Strategic Management	2056-2543	2056-2551	Business & Management (General)		Emrald	B	Q1	3		1.11			2 categories: Cross-Cultural + Strategy	30	Quarterly	600	9.9	70	2.52064	71.6	69.1	25.8	8000	14–30	60	0	3400	Lengthy	Hybrid	0		https://www.emeraldgrouppublishing.com/journal/ccsm	Yes	1995	30	No	Publishes research on strategic management in cross-cultural and international contexts.	0.06	0.087	0.07	1	0.553	1	1	0	0	0.991	0.912
527	Economics of Education Review	0272-7757	1873-7309	Economics	Economics, Econometrics and Finance	Elsevier	A	Q1	1.8	3.9	1.266	96	2.47	Multi Category	44	Quarterly	700	12	75	2.52246	61.6	73	15.8	8000	21–45	4	15	3800	Lengthy	Hybrid	0		https://www.sciencedirect.com/journal/economics-of-education-review	No	1981	44	No	Focuses on the economic analysis of education and human capital, covering policy, finance, and outcomes.	0.168	0	0	0	0.421	1	1	0	0	0.912	0
942	Nonprofit and Voluntary Sector Quarterly	0899-7640	1552-7397	Public Administration & Policy	Social Sciences	Sage	A	Q1	2.5	5	1.17	96	3.79	1 category: Nonprofit	53	Quarterly	800	13.1		2.52279	74.8	74.4	28.3	8000		34	32	3000	Moderate	Hybrid	12		https://journals.sagepub.com/home/nvs	No	1972	53	No	A premier journal publishing research on nonprofit organizations, philanthropy, and the voluntary sector.	0	0	0	0	0.447	1	1	0	0	0.797	0
935	Educational and Psychological Measurement	0013-1644	1552-6900	Business & Management (General)	Mathematics	Sage	A	Q1	2.3	5.9	1.949	105	3.52	1 category: Measurement	84	Quarterly	600	9.1		2.52534	49.6	71.6	27.9	8000		4	32	4130	Moderate	Hybrid	0		https://journals.sagepub.com/home/epm	No	1941	84	No	Publishes research on measurement, assessment, and statistical analysis in education, psychology, and social science.	0.063	0.053	0.012	0.75	0.41	1	1	0	0	0.929	0
642	R&D Management	0033-6807	1467-9310	Business & Management (General)		Wiley	A		5.7			98		1 category: R&D	54	Quarterly	900	15	78	2.53069	49	74.8	32.4	8000	30–60	19	0	2000	Moderate		0		https://onlinelibrary.wiley.com/journal/14679310	Yes	1971	54	No	A leading journal dedicated to the management of Research and Development (R&D), technology, and innovation.	0.015	0.041	0.014	0.5	0	1	1	0	0	0.976	0
563	Organization & Environment	1086-0266	1552-7478	Accounting & Finance		Sage	A	Q1	7.3	8.9		80		2 categories: Organization + Environment	38	Quarterly	400	3.4	75	2.53244	49.6	74.1	28.4	8000	21–45	31	31	4140	Moderate	Hybrid	12		https://journals.sagepub.com/home/oae	No	1987	38	No	An interdisciplinary journal focusing on the relationship between organizations and their social, economic, and natural environments, including corporate social responsibility.	0.213	0.173	0.039	1	0	1	1	0	0	0.991	0.973
954	Eurasian Business Review	2068-1502	2147-4299	Accounting & Finance	Economics, Econometrics and Finance	Springer	C	Q1	3.5	5.8	0.879	27	4.02	2 categories: Business + Eurasia	14	Quarterly	500	7	93	2.53339	71.1	73.3	30.5	8000	14-30	10	0	1350	Moderate	Hybrid	12		https://link.springer.com/journal/40821	No	2011	14	No	Focuses on research on business, management, and economic issues relevant to the Eurasian region.	0	0	0	0	0	1	0	0	0	0	0
665	Asia Pacific Journal of Human Resources	1744-7941	1744-7941	Sustainability & Environmental Management	Business, Management and Accounting	Wiley		Q1	4.5	5.7	0.969	39	4.56	1 category: HR	62	Quarterly	450	5	65	2.53694	51.3	68.3	17.4	9000	10–21	9	0	1400	Moderate		0		https://onlinelibrary.wiley.com/journal/17447941	No	1963	62	No	Focuses on Human Resource Management (HRM) and employment relations issues specific to the Asia Pacific region.	0.019	0.038	0.017	0.75	0	1	0	0	0	0.906	0.872
938	Leadership	1742-7151	1742-716X	Economics	Social Sciences	Sage	B	Q1	2.2	4.7	0.87	53	3.89	1 category: Leadership	20	Quarterly	500	6		2.53703	65.5	74.1	29.8	8000		17	32				0		https://journals.sagepub.com/home/lea	No	2005	20	No	Publishes theoretical and conceptual research on the nature and practice of leadership in various contexts.	0	0	0	1	0	1	1	0	0	0.994	0.973
550	Educational Management Administration & Leadership	1741-1432	1741-1440	Entrepreneurship & Innovation		Sage	B	Q1	3.3		1.39			2 categories: Education + Management	52	Quarterly	600	9.3	70	2.53742	45.2	72.7	22.6	8000	14–30	14	23	4150	Moderate	Hybrid	12		https://journals.sagepub.com/home/ema	No	1973	52	No	Focuses on research related to educational management, administration, and leadership in schools and educational institutions.	0.284	0.264	0.098	1	0	0.952	1	0	0	0.871	0.912
207	Risk Analysis	0272-4332	1539-6924	Business & Management (General)	Engineering	Wiley		Q1	3.3	7.8	0.931	146	4.16	Multi Category	44	Monthly	1000	16	75	2.5389	71.2	73.8	25.2	8000	21–45	32	0	4880	Lengthy	Hybrid	12		https://onlinelibrary.wiley.com/journal/15396924	No	1981	44	No	A leading journal dedicated to risk analysis, assessment, characterization, management, and communication across all domains.	0.075	0.101	0.026	0.75	0	1	0	1	0	0.976	0
812	Environmental Science & Policy	1462-9011	1873-6337	Business & Management (General)		Elsevier			5.2			159		2 category: Policy & Law	27	Quarterly	1500	20		2.54087	80.3	76.7	34.6	8000		6	10	3900	Moderate	Hybrid	12		https://www.sciencedirect.com/journal/environmental-science-and-policy	Yes	1998	27	No	Focuses on the interface between environmental science and policy-making, covering issues like pollution, climate change, and resource management.	0.216	0.37	0.12	1	0.22	1	1	0	0	0.924	0
884	Tunnelling and Underground Space Technology	0886-7798	1879-3464	Engineering & Technology	Earth and Planetary Sciences	Elsevier		Q1	7.4	11.5	2.125	126	7.11	1 category: Tunnelling	39	Monthly	1500	20		2.54087	82.4	74.8	44.5	10000		10	9	4200	Moderate	Hybrid	12		https://www.sciencedirect.com/journal/tunnelling-and-underground-space-technology	No	1986	39	No	Publishes research on the design, construction, and safety of tunnels and underground space, including geotechnical engineering and planning.	0.075	0.108	0.033	1	0	1	0	0	0	0.759	0
378	International Journal of Educational Management	1758-6518	1758-6518	Business & Management (General)	Business, Management and Accounting	Emrald	B	Q2	2.4	3.6	0.493	59	2.54	2 categories: Education + Management	38	Quarterly	700	11.2	62	2.54211	63.5	69.4	19.2	8000	10–21	41	0	3090	Moderate	Hybrid	12		https://www.emeraldgrouppublishing.com/journal/ijem	No	1987	38	No	Publishes research on the management, leadership, and administration of educational organizations at all levels.	0.112	0	0	0	0	1	0	0	0	0.794	0
845	Journal of Government and Economics	2590-3343		Business & Management (General)		Elsevier		Q1		3		7		2 categories: Government + Economics	2	Quarterly	350			2.54407	69.8	78.3	35.3	8000		4	6	3120	Easy	Gold OA	12		https://www.sciencedirect.com/journal/journal-of-government-and-economics	No	2023	2	No	A peer-reviewed journal publishing research at the intersection of government policies, economic theory, and financial implications.	0.261	0.161	0.05	0	0.767	1	1	0	0	0.921	0
948	Information Systems and e-Business Management	1617-9846	1617-9854	Strategy & International Business	Computer Science	Springer	B	Q2	3.6	5.9	0.708	43	3.89	2 categories: IT + e-Business	22	Quarterly	350			2.54407	75.6	72.3	23.1	8000		18	0	3090	Moderate	Hybrid	12		https://link.springer.com/journal/10257	No	2003	22	No	Focuses on the development, implementation, and management of information systems and e-business in organizations, emphasizing practical relevance.	0.142	0.082	0.028	1	0	1	0	0	0	0.95	0
834	Journal of Contemporary Accounting & Economics	1815-5662	1878-592X	Business & Management (General)		Elsevier		Q1	2.9		1.25			1 category: Accounting	20	Quarterly	350			2.54407	78.1	77.1	25.6	8000		9	4	1300	Moderate	Gold OA	0		https://www.sciencedirect.com/journal/journal-of-contemporary-accounting-and-economics	No	2005	20	No	Publishes theoretical and empirical research on contemporary issues in accounting and economics, emphasizing rigor and relevance.	0.078	0.111	0.024	0.5	0	1	0	1	0	0.974	0
755	Marketing Intelligence & Planning	0263-4503	1758-5701	Engineering & Technology		Emrald	A		5.4			92		1 category: Intelligence	43	Quarterly	700	11.2	70	2.54413	76.7	68	17.3	8000	14–30	59	0		Moderate		0		https://www.emeraldgrouppublishing.com/journal/mip	No	1982	43	No	Focuses on strategic marketing planning, market intelligence, research, and analysis for managerial decision-making.	0.332	0	0	0	0.321	1	1	0	0	0.962	0
330	Human Performance	0895-9285	1532-7043	Business & Management (General)	Psychology	T&F	A	Q2	2.2	4	0.893	78	2.73	1 category: Performance	37	Quarterly	400	3	80	2.54419	51.3	74.1	28.3	8000	30–60	7	0	2040	Moderate		0		https://www.tandfonline.com/journals/hhup20	No	1988	37	No	Focuses on research on human capabilities and limitations in the workplace, covering performance measurement, training, and cognitive processes.	0.175	0	0	0	0.291	1	0	0	0	0.891	0
963	Baltic Journal of Management	1746-5273	1746-5273	Business & Management (General)	Business, Management and Accounting	Emrald	C	Q2	2.5	4.1	0.661	33	3.46	1 category: Management	20	Quarterly	500	5.7		2.54513	82.7	73.7	25.3	8000		22	0	2500	Moderate	Hybrid	0		https://www.emeraldgrouppublishing.com/journal/bjm	No	2005	20	No	Publishes research on management, business, and economics relevant to the Baltic region and Northern Europe.	0.071	0	0	0	0.524	1	1	0	0	0.918	0.885
54	Safety and Health at Work	2093-7911	2093-7997	HRM & Organizational Behavior	Chemical Engineering	Elsevier		Q1	2.9	6.4	0.877	44	3.66	1 category: Occupational Health	15	Quarterly	700	11	55	2.54606	52.1	46.3	11.2	8000	7–14	0	5	2000	Moderate	Gold OA	0		https://www.sciencedirect.com/journal/safety-and-health-at-work	No	2010	15	No	Focuses on research and policy related to occupational safety, health, and well-being in the workplace, emphasizing prevention.	0.06	0.091	0.027	1	0	1	0	0	0	0.974	0
252	Journal of Hospitality and Tourism Technology	1757-9880	1757-9899	Tourism & Hospitality	Computer Science	Emrald	B	Q1	6.9	9.1	1.46	42	5.61	Multi Category	15	Quarterly	600	8.6	58	2.55396	59	71.6	25.6	8000	7–14	36	0	4280	Moderate	Hybrid	12		https://www.emeraldgrouppublishing.com/journal/jhtt	No	2010	15	No	Dedicated to research on the strategic adoption and impact of technology in the hospitality and tourism industries.	0	0	0	0	0	1	0	0	0	0.862	0
1004	Journal of Change Management	1479-1811	1479-1811	Business & Management (General)	Business, Management and Accounting	T&F	C	Q2	2.1	5.6	0.853	49	3.32	1 category: Change	24	Quarterly	600	8		2.5559	54.7	77.4	36.8	8000		0	0	3200	Moderate	Hybrid	0		https://www.tandfonline.com/journals/rjcm20	No	2001	24	No	Focuses on research related to the theory and practice of organizational change management and transformation.	0.03	0.048	0.027	1	0	1	1	0	0	0.941	0
511	Chinese Management Studies	1750-6158	1750-6158	Economics	Business, Management and Accounting	Emrald	C	Q2	2.3	3.3	0.484	31	2.9	2 categories: Management + China	18	Quarterly	600	8.6	70	2.557	79.7	49.9	26.4	8000	14–30	48	0		Lengthy		0		https://www.emeraldgrouppublishing.com/journal/cms	Yes	2007	18	No	Publishes research on management and business issues relevant to China and Chinese-related contexts.	0	0	0	0	0	1	1	0	0	0.821	0
259	Journal of Services Marketing	2054-1925	2054-1925	Business & Management (General)	Business, Management and Accounting	Emrald	A	Q1	4.5	7.8	1.577	119	5.02	1 category: Services	38	Quarterly	800	12.5	70	2.55799	75.7	72.7	27.9	8000	14–30	32	0	3300	Moderate	Hybrid	0		https://www.emeraldgrouppublishing.com/journal/jsm	No	1987	38	No	Focuses on research relevant to marketing services, including quality, relationships, design, and internal marketing.	0	0	0	0	0.361	1	1	0	0	0.9	0
494	Journal of Statistical Theory and Practice	1559-8608	1559-8616	Business & Management (General)	Mathematics	Springer		Q3	0.9	1	0.289	22	0.67	1 category: Statistics	18	Quarterly	350		58	2.55882	45.9	66.4	15.8	8000	7–14	25	0		Moderate	Subscription	0		https://link.springer.com/journal/42519	No	2007	18	No	Publishes research on statistical theory, methodology, and applications in various scientific and industrial fields.	0.052	0.058	0.084	0	0	1	0	0	0	0	0
107	Journal of Dermatologic Science and Cosmetic Technology	2320-9975		Accounting & Finance		Elsevier						9		1 category: Dermatology		Quarterly	350		60	2.55933	66.7	49.2	14.3	8000	10–21	12	4	3040	Moderate	Gold OA	0		https://www.sciencedirect.com/journal/journal-of-dermatologic-science-and-cosmetic-technology	No			No	A specialized journal focusing on scientific advances in dermatology, skin science, and cosmetic technology, including molecular, clinical, and regulatory aspects.	0	0	0	0	0	1	0	0	0	0	0
296	Journal of Safety Science and Resilience		2666-4496	Accounting & Finance		Elsevier		Q1	3.4			19		2 categories: Reliability & Quality	5	Quarterly	350		60	2.55933	57.2	51.7	19.9	8000	7–14	6	36	2000	Moderate	Gold OA	0		https://www.sciencedirect.com/journal/journal-of-safety-science-and-resilience	No	2020	5	No	Focuses on safety science, accident prevention, and organizational/systemic resilience against hazards.	0.071	0.072	0.032	1	0.434	1	0	0	0	0.976	0
50	Journal of Sustainable Business	3059-3166	3059-3174	Business & Management (General)		Springer								2 categories: Sustainability + Business		Quarterly	350		62	2.55984	70.6	65.3	18.3	8000	10–21	4	0	3540	Moderate		12		https://www.emeraldgrouppublishing.com/journal/jsb	No			No	Publishes research on sustainable business practices, corporate social responsibility (CSR), and environmental management.	0	0	0	0	0	1	1	0	0	0.821	0
615	Journal of Statistical Theory and Applications	1538-7887		Tourism & Hospitality		Springer	C	Q3	1.8			10		1 category: Statistics	23	Quarterly	350		62	2.55984	58.7	69.4	19.7	10000	10–21	39	0	1490	Moderate	Gold OA	0		https://link.springer.com/journal/42519	No	2002	23	No	Publishes research on statistical theory, methods, and their applications in various scientific domains.	0.104	0.13	0.089	1	0.372	0.952	1	0	0	0.906	0.757
639	American Journal of Agricultural Economics	0002-9092	1467-8276	Healthcare Management	Agricultural and Biological Sciences	Wiley	A*	Q1	3.3	7.8	2.075	126	4.95	1 category: Agricultural	106	Quarterly	1200	17.5	78	2.56014	82.9	73	28.9	8000	30–60	0	0	4060	Moderate	Hybrid	0		https://onlinelibrary.wiley.com/journal/14678276	No	1919	106	No	A premier journal publishing research on agricultural economics and applied economics related to food, agriculture, and resource use.	0.131	0.204	0.049	1	0	1	1	0	0	0.768	0
315	Organization Theory	2631-7897		Business & Management (General)		Sage		Q1		6	2.5	33		1 category: Org Theory	5	Quarterly	800	12.5	80	2.56053	52.4	74.4	29.7	8000	30–60	0	0	1000	Moderate	Gold OA	0		https://journals.sagepub.com/home/ott	No	2020	5	No	A specialized journal for theoretical and conceptual work on organization and management, often drawing on sociology, philosophy, and political science.	0.164	0.067	0.026	1	0	1	1	0	0	0.894	0
875	The British Accounting Review	0890-8389	1097-9878	Accounting & Finance		Elsevier		Q1	9.4	7.8		80		1 category: Accounting	56	Quarterly	700	10		2.56059	82.3	70.4	27.1	8000		14	4		Moderate		0		https://www.sciencedirect.com/journal/the-british-accounting-review	No	1969	56	No	Publishes original, scholarly research across the whole spectrum of accounting and finance, including financial reporting, management accounting, auditing, taxation, and social/environmental accounting.	0.265	0	0	0	0	1	1	0	0	0.912	0.804
950	Marketing Letters	0929-693X	1573-059X	Operations & Supply Chain	Economics, Econometrics and Finance	Springer	A	Q1	2.5	4.3	1.672	80	3.83	1 category: Marketing	33	Quarterly	700	10		2.56059	84.7	70.4	31.4	8000		18	0	3190	Easy	Hybrid	0		https://link.springer.com/journal/11002	No	1992	33	No	Publishes short, high-quality, and timely research contributions across all fields of marketing.	0	0	0	0	0	1	0	0	0	0.762	0
855	Journal of Urban Economics	0094-1190	1096-0422	Business & Management (General)	Social Sciences	Elsevier	A*	Q1	4.8	7.9	3.076	126	5.97	1 category: Urban	51	Quarterly	700	10		2.56059	71.5	79.3	22.1	8000		7	21	4100	Lengthy	Hybrid	24		https://www.sciencedirect.com/journal/journal-of-urban-economics	No	1974	51	No	Publishes research on urban and regional economics, including housing markets, location theory, transportation, and local public finance.	0.052	0.058	0.009	0.75	0.241	1	1	0	0	0.974	0
452	Public Transport	1866-7493	1866-7507	Business & Management (General)	Engineering	Springer		Q1	2.2	5.5	0.697	32	3.09	1 category: Transport	16	Quarterly	350		65	2.5606	68.2	72.7	21.8	9000	10–21	4	0	3630	Moderate	Hybrid	0		https://link.springer.com/journal/12469	No	2009	16	No	Focuses on research on the planning, operations, economics, and policy of public transportation systems.	0	0	0	1	0	1	1	0	0	0	0
408	DECISION	1545-8504	1545-8504	Accounting & Finance	Decision Sciences	Springer	A	Q2	1	2.3	0.719	21	1.44	1 category: Decision	51	Quarterly	350		65	2.5606	63.8	43.2	13.2	8000	10–21	98	0	4200	Moderate	Hybrid	0		https://link.springer.com/journal/40622	No	1974	51	No	Publishes research in management science, decision sciences, and business analytics with a focus on decision-making.	0.086	0.079	0.02	0.75	0	1	0	0	0	0.915	0
605	Global Journal of Flexible Systems Management	0972-2467	2321-7052	Business & Management (General)		Springer	A	Q1	2.5	4	0.42	51		1 category: Flexible	25	Quarterly	350		65	2.5606	47.3	48.8	21.5	8000	10–21	5	0	3090	Moderate	Hybrid	12		https://link.springer.com/journal/40171	No	2000	25	No	Publishes research on flexible systems management, agility, and adaptability in business and organizations.	0.082	0	0	0.75	0	1	0	0	0	0.562	0
625	Development and Sustainability in Economics and Finance		2950-5240	Entrepreneurship & Innovation		Elsevier								2 categories: Development + Sustainability		Quarterly	350		65	2.5606	73.9	69.7	25.4	8000	10–21	0	0	2570	Moderate	Hybrid	0		https://link.springer.com/journal/43621	No			No	Focuses on research on economic development, sustainability, and their intersection with financial markets and policy.	0.228	0.286	0.166	1	0.417	1	0	0	0	0.982	0.993
441	Journal of Banking Regulation	1465-9891	1746-8579	Business & Management (General)	Economics, Econometrics and Finance	Springer	C	Q2	1.5	2.4	0.414	17	2.2	2 categories: Banking + Regulation	26	Quarterly	350		70	2.56188	56	68.7	12.6	10000	14–30	32	0	4700	Moderate	Hybrid	0		https://www.palgrave.com/gp/journal/41261	No	1999	26	No	Focuses on the law, policy, and practice of financial regulation of banks and other financial institutions.	0.168	0	0	0	0	1	0	0	0	0.926	0.73
92	Journal of Management Control	2191-477X	2191-477X	Engineering & Technology	Decision Sciences	Springer	A	Q2	3.6	4.3	0.693	23	3.17	1 category: Control	16	Quarterly	350		70	2.56188	83.5	66.4	22.3	8000	14–30	0	0	3290	Lengthy	Hybrid	0		https://link.springer.com/journal/187	No	2009	16	No	Dedicated to research on the design and use of management control systems to achieve organizational goals.	0.097	0.154	0.041	1	0	1	0	0	0	0.782	0.926
582	Asia-Pacific Financial Markets	1384-6978	1573-0941	Business & Management (General)	Economics, Econometrics and Finance	Springer	C	Q3	2.6	2.3	0.232	24	1.3	Specialized	28	Quarterly	350		72	2.56239	66.2	51.7	21.6	8000	14–30	14	0	3390	Moderate	Hybrid	0		https://link.springer.com/journal/10690	No	1997	28	No	Focuses on research on financial markets, institutions, and corporate finance relevant to the Asia-Pacific region.	0.093	0	0	0	0.408	1	0	0	0	0.947	0.939
213	Applied Computing and Informatics	2210-832X		Business & Management (General)		Emrald		Q2	4.9			28		1 category: Computing	16	Quarterly	400	2	50	2.56277	77.1	49.6	16.3	8000	5–10	11	0	4740	Easy	Diamond OA	0		https://www.emeraldgrouppublishing.com/journal/aci	No	2009	16	No	Publishes theoretical and applied research in computing, information technology, and informatics, covering algorithms, software engineering, and applications.	0.149	0.127	0.092	1	0	1	1	0	0	0.979	0.966
401	Journal of Housing Economics	1051-1377	1090-1556	Sustainability & Environmental Management	Economics, Econometrics and Finance	Elsevier	A	Q2	2.4	3.4	0.795	59	2.61	Specialized	33	Quarterly	350		75	2.56315	84.2	68.7	22.1	9000	21–45	10	6	3500	Moderate	Hybrid	24		https://www.sciencedirect.com/journal/journal-of-housing-economics	No	1992	33	No	Focuses on the economic analysis of housing markets, including supply, demand, finance, policy, and urban land use.	0.112	0	0	1	0	1	0	0	0	0.956	0
484	International Journal of Health Care Quality Assurance	1758-6542	1758-6542	Business & Management (General)	Business, Management and Accounting	Emrald	C	Q3	2.2	4	0.529	54	1.6	2 categories: Health + Quality	37	Quarterly	600	8.3	65	2.56412	61.3	68.7	31.5	8000	10–21	182	0	3500	Moderate	Hybrid	0		https://www.emeraldgrouppublishing.com/journal/ijhcqa	No	1988	37	No	Publishes research on quality improvement, assurance, and management in health care organizations.	0.175	0	0	0.75	0	1	1	0	0	0.971	0
239	International Marketing Review	0265-1336	1758-6708	Engineering & Technology	Economics, Econometrics and Finance	Emrald	A	Q1	4.6	8.5	1.309	103	5.95	1 category: International Marketing	39	Bimonthly	700	10.5	70	2.56419	72.2	73.3	29.5	8000	14–30	40	0	3400	Lengthy		0		https://www.emeraldgrouppublishing.com/journal/imr	No	1986	39	No	Focuses on international and cross-cultural marketing research, covering strategy, consumer behavior, and global market entry.	0.127	0	0	0	0.573	1	0	0	0	0.971	0.926
513	Information and Computer Security	2056-497X	2056-497X	Business & Management (General)	Decision Sciences	Emrald	B	Q2	1.8	3.7	0.47	55	2.15	1 category: Security	34	Quarterly	700	10.4	65	2.56578	47.4	69.3	21.7	8000	10–21	23	0		Moderate		12		https://www.emeraldgrouppublishing.com/journal/ics	No	1991	34	No	Publishes research on information security, computer security, and risk management in organizations.	0.097	0.067	0.025	1	0.372	1	1	0	0	0	0
1019	Technology in Society	1879-2995	1879-1119	Engineering & Technology	Business, Management and Accounting	Elsevier	C	Q1	12.5	11.2	1.491	69	10.32	2 categories: Tech + Society	49	Quarterly	1000	15	68	2.56734	55.3	82	40.1	8000	14–28	11	2	4010	Moderate		0		#N/A	No	1976	49	No	Addresses the broad impacts of technology on society, including social, political, economic, ethical, and cultural consequences of technological change and development.	0.127	0.168	0.036	0.75	0.47	1	0	0	0	0.797	0
1049	Government Information Quarterly	0740-624X	1873-4016	Strategy & International Business	Social Sciences	Elsevier	A	Q1	10	17.3	2.321	123	9.37	2 categories: Government + IT	41	Quarterly	1000	15	70	2.56785	48.7	77.1	40.3	8000	14–30	3	9	3240	Lengthy	Hybrid	12		#N/A	Yes	1984	41	No	Focuses on the use, management, and policy of information and information technology in the public sector, including e-government and open data.	0.015	0.029	0.011	0.5	0	1	0	0	0	0	0
716	International Journal of Managerial Finance	1743-913X	1743-9148	Business & Management (General)	Economics, Econometrics and Finance	Emrald	A	Q2	2.2	4	0.442	30	2.65	1 category: Finance	20	Quarterly	500	5.4	70	2.5711	83.9	76.7	33.7	8000	14–30	23	0	3400	Moderate	Hybrid	12		https://www.emeraldgrouppublishing.com/journal/ijmf	Yes	2005	20	No	Publishes research on corporate finance and financial management from a managerial and strategic perspective.	0.127	0.238	0.078	1	0	1	0	0	0	0.926	0.959
182	Journal of Interactive Marketing	1520-6653	1520-6653	Accounting & Finance	Business, Management and Accounting	Sage	A	Q1	7.8	17.4	4.092	120	13.62	1 category: Interactive Marketing	31	Quarterly	450	3.8	78	2.5723	71.6	73.9	28.4	8000	30–60	22	57	3440	Lengthy	Hybrid	0		https://journals.sagepub.com/home/jimx	No	1994	31	No	Publishes research on the theory and practice of interactive marketing in all its forms, emphasizing data, technology, and customer relationships.	0.063	0.132	0.035	0.75	0.712	1	1	0	0	0.9	0
1048	Applied Psychology	0269-9948	1464-0597	Economics	Arts and Humanities	Wiley		Q1	4.3	9.9	2.279	104	9.26	1 category: Applied	73	Quarterly	800	12	75	2.57388	79.3	81.3	45.9	8000	21–45	48	0		Moderate		12		#N/A	No	1952	73	No	Publishes research that applies psychological theory and principles to real-world problems, including work, organizational, and social settings.	0.082	0.113	0.066	1	0	1	0	0	0	0.991	0.899
308	European Journal of Work and Organizational Psychology	1359-432X	1464-0694	Business & Management (General)	Psychology	T&F	A	Q1	3.4	8.5	1.966	84	5.33	1 category: Work Psych	33	Quarterly	600	8	75	2.57507	52.2	74.1	30.6	8000	21–45	8	11	3900	Moderate		0		https://www.tandfonline.com/journals/pewo20	No	1992	33	No	Publishes research on work and organizational psychology with a focus on European contexts and organizational issues.	0.19	0	0	0.75	0	1	0	0	0	0.818	0
227	European Journal of Innovation Management	1460-1060	1758-7115	Business & Management (General)	Business, Management and Accounting	Emrald	C	Q1	5.7	9	1.142	74	6.88	1 category: Innovation	27	Quarterly	600	7.9	65	2.57531	66.7	72.7	28.4	8000	10–21	27	0	3400	Moderate	Hybrid	0		https://www.emeraldgrouppublishing.com/journal/ejim	No	1998	27	No	Focuses on innovation management and new product development within a managerial context, with a particular European focus.	0.164	0.2	0.112	1	0	1	0	0	0	0.991	0
992	Journal of Information Technology	0268-3962	1460-5457	Marketing	Computer Science	Sage	A*	Q1	5.4	7.8	1.375	86	3.94	1 category: IT	39	Quarterly	400	1		2.57604	53.1	23.9	36.1	8000		9	23	3200	Lengthy	Hybrid	0		https://www.palgrave.com/gp/journal/41265	No	1986	39	No	Publishes research on the management and organizational aspects of information technology (IT).	0.037	0.041	0.011	0	0	1	1	0	0	0.935	0.622
718	International Journal of Physical Distribution & Logistics Management	0960-0035	1758-6554	Business & Management (General)		Emrald	A		7.3			98		1 category: Distribution	54	Quarterly	800	11.9	75	2.5768	65.8	78	36.1	8000	21–45	31	0	3400	Moderate	Hybrid	12		https://www.emeraldgrouppublishing.com/journal/ijpdlm	No	1971	54	No	Focuses on business logistics, physical distribution, and supply chain management, covering transport, warehousing, and marketing channels.	0.123	0.144	0.037	1	0	1	1	0	0	0.762	0
688	Benchmarking: An International Journal	1463-5771	1758-2621	Business & Management (General)		Emrald	B		4.4			92		1 category: Benchmarking	31	Quarterly	1000	14.5	65	2.58167	62.2	70.1	26.7	8000	10–21	100	0	2500	Moderate	Hybrid	12		https://www.emeraldgrouppublishing.com/journal/bij	No	1994	31	No	Dedicated to the research and practice of benchmarking and continuous improvement in organizational performance.	0.381	0.257	0.217	1	0	0.905	0	1	0	0.982	0
957	Creativity and Innovation Management	1467-8691	1467-8691	Business & Management (General)	Business, Management and Accounting	Wiley	C	Q1	4.2	5.8	0.986	72	4.14	1 category: Creativity	35	Quarterly	600	7		2.58368	53.9	51.7	22.6	8000		9	0	2900	Moderate	Hybrid	12		https://onlinelibrary.wiley.com/journal/14678691	No	1990	35	No	Dedicated to research on creativity, innovation processes, and the management of organizational innovation.	0	0	0	0	0.434	1	0	0	0	0	0
1000	Journal of Monetary Economics	0304-3932	1872-6241	Economics	Economics, Econometrics and Finance	Elsevier	A*	Q1	4.1	5.9	5.944	142	3.85	Specialized	52	Quarterly	800	11		2.58375	58.3	77.1	39.6	8000		4	5		Lengthy		24		https://www.sciencedirect.com/journal/journal-of-monetary-economics	Yes	1973	52	No	A premier journal publishing research on monetary theory, macroeconomics, and financial economics.	0.082	0.096	0.039	1	0.553	1	1	1	0	0.921	0
1009	Journal of Business Logistics	2158-1592	2158-1592	Engineering & Technology	Decision Sciences	Wiley	A	Q1	7.4	13.6	3.135	90	8.96	1 category: Logistics	45	Quarterly	700	9		2.58904	64.9	82	48.7	8000		33	0	3400	Moderate	Hybrid	12		#N/A	No	1980	45	No	Dedicated to research that advances business logistics and supply chain management knowledge, emphasizing the integration of logistics with other business functions.	0.216	0.269	0.088	1	0	0.952	1	1	0	0.988	0.797
751	Leadership & Organization Development Journal	0143-7739	1758-6937	Entrepreneurship & Innovation		Emrald	B	Q1	3.6		1.04			1 category: Leadership	45	Quarterly	600	7.4	68	2.59006	58.9	71.6	28.4	8000	14–28	50	0	3400	Moderate	Hybrid	0		https://www.emeraldgrouppublishing.com/journal/lodj	No	1980	45	No	Publishes research on leadership, organizational development (OD), and change management with a practical orientation.	0.056	0	0	0.5	0.647	1	1	0	0	0.9	0
921	Journal of Small Business & Entrepreneurship	0827-6331	1718-0518	Information Systems & Digital Business		T&F		Q2			0.35			1 category: Small Business	42	Quarterly	500	4		2.59101	81.6	51.7	20.9	8000		1	0		Moderate		12		#N/A	No	1983	42	No	Covers a broad range of topics related to small business, family business, and entrepreneurship in global contexts.	0.235	0.5	1	1	0	1	0	0	0	0	0.811
97	Journal of Business Strategy	0275-6663	1746-526X	Business & Management (General)		Emrald	B	Q1	2.2	3.2		45		1 category: Strategy	45	Bimonthly	600	7	60	2.59918	78.9	68.2	17.4	8000	7–14	230	0	2500	Moderate	Hybrid	0		https://www.emeraldgrouppublishing.com/journal/jbs	Yes	1980	45	No	A practice-oriented journal focusing on strategic management, planning, and competitive strategy for executives.	0.16	0.13	0.052	1	0.673	0.976	1	1	0	0.976	0
127	Journal of Consumer Behaviour	1472-0817	1479-183X	Marketing	Psychology	Wiley	A	Q1	5.2	5	0.978	53	5.06	1 category: Consumer	24	Monthly	600	7	68	2.60125	51.3	71.9	24.3	8000	14–28	7	0	4470	Moderate		12		https://onlinelibrary.wiley.com/journal/14791838	No	2001	24	No	Publishes research on consumer behavior and psychology, focusing on consumer decision-making and market responses.	0.179	0	0	0	0.321	1	1	0	0	0.968	0.959
1063	Corporate Social Responsibility and Environmental Management	1535-3958	1535-3966	Strategy & International Business	Environmental Science	Wiley	C	Q1	9.1	15.6	2.134	96	10.83	2 categories: CSR + Environmental	32	Bimonthly	800	11	68	2.60132	75.1	82	48.4	8000	14–28	3	0		Moderate		12		#N/A	No	1993	32	No	Focuses on the theory and practice of Corporate Social Responsibility (CSR) and the environmental dimension of business, including ethics, governance, and sustainability.	0.104	0	0	0	0	1	0	0	0	0.885	0
82	Information Systems Journal	1350-1917	1365-2575	Business & Management (General)	Computer Science	Wiley	A*	Q1	6.3	16.3	2.748	100	7.41	1 category: Information Systems	34	Bimonthly	600	7	70	2.60177	67.8	73.1	24.9	8000	14–30	3	0	4460	Lengthy		0		https://onlinelibrary.wiley.com/journal/13652575	Yes	1991	34	No	Publishes research on the analysis, design, implementation, and management of information systems, emphasizing rigor and relevance.	0	0	0	0	0.421	1	1	0	0	0.859	0.824
874	The Asian Journal of Shipping and Logistics	2468-2321	2468-2569	Entrepreneurship & Innovation		Elsevier		Q1	3.7		1.02			1 category: Shipping	11	Quarterly	400			2.60206	49.6	77.4	43.7	8000		0	0	2830	Easy	Gold OA	12		https://www.sciencedirect.com/journal/the-asian-journal-of-shipping-and-logistics	No	2014	11	No	Focuses on research on shipping, port operations, maritime logistics, and supply chain management in the Asian region.	0.149	0.166	0.044	0	0	1	1	0	0	0.924	0
819	Grain & Oil Science and Technology	2575-102X	2575-1011	Business & Management (General)		Elsevier		Q3		2.2		12		1 category: Grain	7	Quarterly	400			2.60206	47.9	68.7	18.7	8000		3	2	3040	Easy		0		https://www.sciencedirect.com/journal/grain-and-oil-science-and-technology	Yes	2018	7	No	Specialized journal covering the science, technology, processing, and storage of grains, oils, and related products.	0	0	0	0	0	1	1	0	0	0.982	0.966
63	Journal of Data, Information and Management	2582-7107	2582-7115	Business & Management (General)		Springer		Q3		2.5	0.24			0	5	Quarterly	400			2.60206	47.3	52.8	16.3	8000		5	0		Easy	Subscription	0		#N/A	No	2020	5	No	Publishes research on data management, information systems, and the strategic use of data in organizations.	0.067	0.096	0.03	0.75	0	1	1	0	0	0	0
801	Borsa Istanbul Review	2214-8463	2214-8471	Tourism & Hospitality	Economics, Econometrics and Finance	Elsevier		Q1	7.1	5.8	0.822	33	5.62	1 category: Finance	13	Quarterly	400			2.60206	56.6	74.4	30.2	8000		4	3		Easy		0		https://www.sciencedirect.com/journal/borsa-istanbul-review	No	2012	13	No	Focuses on financial markets and institutions, corporate finance, and investments, particularly those related to emerging markets and the Turkish market.	0.209	0.147	0.249	1	0.553	0	1	1	0	0.979	0
919	Schmalenbach Journal of Business Research	2367-1522	2367-1530	Marketing		Springer		Q2		3.1	0.38			1 category: Business	4	Quarterly	400			2.60206	80.8	66.4	18.2	8000		16	0		Moderate	Diamond OA	0		#N/A	No	2021	4	No	Focuses on business research with a strong link between theory and practical management issues, often with a German-European focus.	0.25	0.212	0.082	1	0	1	0	0	0	0.897	0
841	Journal of Engineering and Technology Management	0923-4748	1872-8813	Information Systems & Digital Business		Elsevier	B	Q1	3.9		1.67	80		1 category: Engineering	34	Quarterly	400			2.60206	83.7	76.7	21.7	8000		21	12	3500	Moderate	Hybrid	0		https://www.sciencedirect.com/journal/journal-of-engineering-and-technology-management	No	1991	34	No	Publishes research on the management of technology, innovation, and engineering enterprises.	0.164	0.149	0.041	1	0	1	0	0	0	0.897	0
878	The Journal of the Economics of Ageing	2212-8285		Education Management		Elsevier		Q1	2		1.18			1 category: Ageing	11	Quarterly	400			2.60206	71.8	75.1	37.2	8000		3	8	3500	Moderate	Hybrid	24		https://www.sciencedirect.com/journal/the-journal-of-the-economics-of-ageing	Yes	2014	11	No	Dedicated to the economic analysis of ageing populations, covering labor markets, health, and pensions.	0.299	0	0	0	0.188	1	0	0	0	0.947	0
856	Library & Information Science Research	0748-5786	1873-1890	Business & Management (General)		Elsevier		Q1	2.3		1.21			1 category: Library	43	Quarterly	400			2.60206	57.6	72	41.6	8000		12	11	3400	Moderate	Hybrid	0		https://www.sciencedirect.com/journal/library-and-information-science-research	No	1982	43	No	Publishes research that addresses theory and practice in library and information science.	0.015	0	0	0	0	1	0	0	0	0.809	0
953	OR Spectrum	1436-6304	1436-6304	Marketing	Decision Sciences	Springer	B	Q1	1.9	4.1	0.992	76	3.32	1 category: Operations	46	Quarterly	400			2.60206	71.5	76.7	38.2	8000		19	0	3290	Moderate	Hybrid	12		https://link.springer.com/journal/291	No	1979	46	No	Publishes high-quality research in Operational Research (OR) and management science, emphasizing mathematical modeling and decision support.	0.086	0.077	0.027	0.75	0.457	1	1	0	0	0.985	0.993
73	Journal of Policy Analysis and Management	1520-6688	1520-6688	Business & Management (General)	Business, Management and Accounting	Wiley	A	Q1	2.6	6	2.111	95	2.2	2 categories: Policy + Management	44	Quarterly	800	11	75	2.60313	65.7	64.3	21.8	10000	21–45	6	0		Lengthy		12		https://onlinelibrary.wiley.com/journal/15206688	No	1981	44	No	A leading journal focusing on the theory and practice of policy analysis and public management.	0.052	0.062	0.017	0.75	0	1	1	0	0	0.918	0
980	Journal of Managerial Psychology	1758-7778	1758-7778	Strategy & International Business	Decision Sciences	Emrald	B	Q1	2.7	6.1	1.306	91	3.71	1 category: Managerial	39	Quarterly	800	10.3		2.60407	81.5	75.4	26.3	8000		74	0	3360	Moderate	Hybrid	0		https://www.emeraldgrouppublishing.com/journal/jmp	No	1986	39	No	Publishes research on psychological aspects of management and organizational behavior, focusing on practical application.	0	0	0	0	0	1	1	0	0	0	0
561	Journal of Leadership & Organizational Studies	1548-0513	1548-0521	Business & Management (General)		Sage			4.9			75		1 category: Leadership	31	Quarterly	500	4.2	72	2.60423	64.4	73.3	35.6	8000	14–30	38	0		Moderate		12		https://journals.sagepub.com/home/jlo	No	1994	31	No	Publishes research that bridges leadership theory and organizational studies, emphasizing applied research and interdisciplinary approaches.	0	0	0	0.75	0	1	1	0	0	0.956	0
977	Journal of Consumer Marketing	2052-1294	2052-1294	HRM & Organizational Behavior	Business, Management and Accounting	Emrald	A	Q1	3.3	4.5	0.845	113	3.3	1 category: Consumer	39	Quarterly	700	8.3		2.60895	71.4	74.1	21.4	8000		44	0	3400	Moderate	Hybrid	12		https://www.emeraldgrouppublishing.com/journal/jcm	No	1986	39	No	Publishes research on marketing to consumers, covering consumer behavior, branding, advertising, and marketing strategies.	0	0	0	0	0.526	1	0	0	0	0	1
646	Gender, Work & Organization	0968-6908	1468-0432	Business & Management (General)		Wiley		Q1	3		1.48			0	31	Bimonthly	1000	13		2.61	60.1	74.8	23.4	8000		40	0	3500	Moderate	Hybrid	12		https://onlinelibrary.wiley.com/journal/14680432	No	1994	31	No	Focuses on the interdisciplinary analysis of gender in the context of work and organizations, including identity, inequality, and policy.	0.034	0	0	0	0.553	1	1	0	0	0.871	0
188	Project Management Journal	1938-9507	1938-9507	Business & Management (General)	Business, Management and Accounting	Sage	B	Q1	4.4	8.8	1.469	55	5.42	1 category: Project	55	Quarterly	700	8.9	72	2.61055	82.6	70.3	25.6	8000	14–30	18	24	3460	Lengthy	Hybrid	0		https://journals.sagepub.com/home/pmj	No	1970	55	No	Published by the PMI, it focuses on advancing the theory, research, and practice of project, program, and portfolio management.	0	0	0	0	0.538	1	0	0	0	0.832	0
865	Regional Science and Urban Economics	0166-0462	1879-1111	Business & Management (General)	Economics, Econometrics and Finance	Elsevier	A	Q1	2.9	4.9	1.247	92	3.18	2 categories: Regional + Urban	54	Quarterly	800	10		2.61278	57.7	57.2	26.9	8000		4	7	3300	Lengthy	Hybrid	24		https://www.sciencedirect.com/journal/regional-science-and-urban-economics	No	1971	54	No	Publishes theoretical and empirical research on urban and regional economics, spatial economics, and urban policy.	0.112	0.096	0.04	1	0	1	0	0	0	0.965	0
830	Journal of Accounting and Economics	1879-1980	1879-1980	Sustainability & Environmental Management	Business, Management and Accounting	Elsevier	A*	Q1	6.8	8.6	6.1	174	5.66	1 category: Accounting	46	Quarterly	800	10		2.61278	65.6	67.6	38.6	8000		3	7	4600	Lengthy	Hybrid	24		https://www.sciencedirect.com/journal/journal-of-accounting-and-economics	Yes	1979	46	No	Publishes research on the relationship between accounting data and economic phenomena, focusing on the uses of accounting information in decision-making.	0.06	0	0	1	0.498	1	1	0	0	0.997	0.993
33	European Journal of Management and Business Economics	2444-8451	2444-8834	Marketing	Economics, Econometrics and Finance	Emrald		Q2	3.7	6.6	0.905	25	4.59	2 categories: Business + Economics	9	Quarterly	550	5.1	55	2.61491	83.6	64.8	9.8	9000	7–14	48	0	2900	Moderate	Gold OA	12		https://www.emeraldgrouppublishing.com/journal/ejmbe	No	2016	9	No	Focuses on management and applied economics research relevant to European companies and economies, covering all business functions.	0.03	0	0	0	0	1	0	0	0	0.953	0
110	NeuroImage: Reports	2666-8941		Marketing		Elsevier		Q2	2.1	4.6		18		1 category: Neuroimaging	5	Quarterly	400		50	2.61507	51.3	73.8	16.5	8000	5–10	7	13	2000	Easy	Gold OA	0		https://www.sciencedirect.com/journal/neuroimage-reports	No	2020	5	No	Publishes short, rapid reports on basic and clinical neuroimaging, including new methods, data, and initial findings.	0.127	0.216	0.118	1	0	1	1	0	0	0	0
49	Data and Information Management	2543-6853	2543-6861	Business & Management (General)		Elsevier		Q2		3.8		16		2 categories: Data + Management	8	Quarterly	400		50	2.61507	66.5	50.2	7.6	8000	5–10	11	7	3710	Moderate	Gold OA	0		https://www.sciencedirect.com/journal/data-and-information-management	Yes	2017	8	No	Focuses on the theories, methods, and applications of data and information management, including data governance, architecture, storage, and security.	0.03	0	0	0	0	1	1	0	0	0.835	0.919
103	Forensic Science International: Synergy	2589-8714		Business & Management (General)		Elsevier		Q1	3.2	6.2		22		1 category: Forensic	6	Quarterly	400		50	2.61507	83.3	69.7	8.9	8000	7–14	0	11	3880	Moderate		0		https://www.sciencedirect.com/journal/forensic-science-international-synergy	No	2019	6	No	A multi-disciplinary journal encouraging collaborative research between different fields of forensic science, emphasizing innovative methods and cross-cutting themes.	0	0	0	0	0	1	1	0	0	0	0
987	Online Information Review	1468-4527	1758-2087	Business & Management (General)	Social Sciences	Emrald	B	Q1	3.5	5.4	0.74	69	4.03	1 category: Online	54	Quarterly	800	9.9		2.61568	79	73.7	32.8	8000		73	0	4230	Easy		0		https://www.emeraldgrouppublishing.com/journal/oir	No	1971	54	No	Focuses on the use, management, and retrieval of online information and digital content, covering libraries, search, and social media.	0.049	0	0	0.75	0	1	1	0	0	0	0
316	Strategic Organization	1476-1277	1741-2978	Marketing	Social Sciences	Sage	A	Q1	3.8	7.8	4.284	70	6.38	1 category: Strategy	22	Quarterly	600	6.6	82	2.61607	82.6	75.1	31.5	8000	30–60	30	43	3200	Lengthy	Hybrid	12		https://journals.sagepub.com/home/soq	No	2003	22	No	Publishes research on the theory and management of organizations and strategic processes, emphasizing sociological and behavioral perspectives.	0.101	0	0	0	0	1	0	0	0	0.976	0.986
56	Exploratory Research in Clinical and Social Pharmacy		2667-2766	Public Administration & Policy		Elsevier		Q1	1.8			12		2 categories: Health + Social	5	Quarterly	400		58	2.61715	70.6	61.9	13.9	8000	7–14	2	3	2700	Moderate	Gold OA	12		https://www.sciencedirect.com/journal/exploratory-research-in-clinical-and-social-pharmacy	No	2020	5	No	Focuses on exploratory and qualitative research related to pharmacy practice, clinical outcomes, and social aspects of drug use.	0.142	0.012	0.005	0.75	0	1	0	0	0	0.868	0
611	Annals of Data Science	2198-5802	2198-5810	Business & Management (General)		Springer		Q1		2.8	0.29	32		1 category: Data	11	Quarterly	400		58	2.61715	77.4	50.6	29.3	10000	7–14	64	0	3190	Moderate	Hybrid	12		https://link.springer.com/journal/40745	No	2014	11	No	Publishes theoretical and applied research in data science, big data analytics, and statistical methods across various disciplines.	0.104	0.115	0.025	0.75	0.372	1	1	0	0	0.932	0
805	Computational Statistics & Data Analysis	0167-9473	1872-7622	Information Systems & Digital Business		Elsevier		Q1	1.6		1.45			1 category: Statistics	42	Quarterly	1200	15		2.6173	57.5	69.7	19.1	10000		4	10	3630	Moderate	Hybrid	0		https://www.sciencedirect.com/journal/computational-statistics-and-data-analysis	No	1983	42	No	Publishes research on computational statistics, statistical methodology, and data analysis techniques.	0.112	0.096	0.032	1	0	1	0	0	0	0.956	0
424	OPSEARCH	0975-0320	0975-0320	Business & Management (General)	Business, Management and Accounting	Springer	C	Q2	1.8	3.4	0.498	26	2.43	1 category: Operations	62	Quarterly	400		60	2.61767	67.6	45.8	11.8	8000	7–14	76	0	3040	Moderate	Hybrid	0		https://link.springer.com/journal/12597	No	1963	62	No	The official journal of the Operational Research Society of India, covering all aspects of Operations Research (OR) theory and applications.	0.09	0	0	1	0.079	1	1	0	0	0.994	0.993
303	Sustainable Futures	2666-1882		Business & Management (General)		Elsevier		Q1	4.9	2.6		14		2 categories: Sustainability + Future	4	Quarterly	400		60	2.61767	75.5	68.7	20.8	8000	7–14	16	3		Moderate		12		https://www.sciencedirect.com/journal/sustainable-futures	No	2021	4	No	Publishes research on sustainable development and futures studies, covering social, economic, and environmental aspects of long-term change and policy.	0.261	0	0	1	0.502	1	0	0	0	0.994	0.993
474	Pain Management Nursing	1524-9042	1532-8694	Business & Management (General)	Nursing	Elsevier		Q1	2.1	3.4	0.486	55	1.62	1 category: Pain	25	Quarterly	400		62	2.61819	78	68.3	30.1	8000	10–21	0	0	3350	Moderate	Hybrid	12		https://www.sciencedirect.com/journal/pain-management-nursing	No	2000	25	No	Focuses on research and clinical practice related to pain assessment and management by nurses.	0.019	0	0.014	1	0	1	0	0	0	0.997	0.973
493	Integrative Psychological and Behavioral Science	1932-4500	1936-3577	Sustainability & Environmental Management	Arts and Humanities	Springer		Q1	1.1	2.4	0.336	39	1.15	1 category: Integrative	59	Quarterly	400		62	2.61819	70.7	68.3	19.2	8000	10–21	7	0	3390	Moderate	Hybrid	0	Seal	https://link.springer.com/journal/12124	Yes	1966	59	No	Focuses on research that promotes conceptual and theoretical integration across different domains of psychology and behavioral science.	0.269	0.409	0.124	1	0	1	1	0	0	0.976	0
604	Wirtschaftsinformatik & Management	1868-6087	1868-6095	Engineering & Technology		Springer								2 categories: Wirtschaft + IT	16	Quarterly	400		62	2.61819	57.4	70.4	19.2	8000	10–21	0	0	2590	Moderate	Hybrid	12		https://link.springer.com/journal/35764	No	2009	16	No	A German journal focusing on Business Informatics (Wirtschaftsinformatik) and Management.	0.134	0.101	0.042	1	0	1	0	0	0	0.768	0
294	Journal of Responsible Technology		2666-6596	Marketing		Elsevier		Q1		4.3		12		Multi Category	4	Quarterly	400		65	2.61897	76.7	69.1	21.5	8000	10–21	10	3	2800	Moderate	Gold OA	0		https://www.sciencedirect.com/journal/journal-of-responsible-technology	No	2021	4	No	Focuses on research and policy related to the ethical, social, and environmental implications of technology (Responsible Innovation).	0.045	0	0	0	0	1	0	0	0	0.971	0
443	Asian Journal of Social Science	1568-484X	1745-9430	Accounting & Finance	Social Sciences	Elsevier	C		1.2	0.8	0.201	24	0.6	1 category: Social Science	52	Quarterly	400		65	2.61897	58.9	48.3	19.4	8000	10–21	0	0	2500	Moderate	Hybrid	12		https://www.sciencedirect.com/journal/asian-journal-of-social-science	No	1973	52	No	An interdisciplinary journal publishing research on social science issues relevant to Asia.	0.183	0.188	0.092	1	0.323	1	0	0	0	0.626	0
279	Current Research in Ecological and Social Psychology	2666-6220		Economics		Elsevier		Q1	2.2			18		2 categories: Ecological + Social	2	Quarterly	400		65	2.61897	64.3	70.1	19.2	10000	10–21	18	4	2000	Moderate	Gold OA	0		https://www.sciencedirect.com/journal/current-research-in-ecological-and-social-psychology	No	2023	2	No	An open-access journal focusing on research at the intersection of ecological and social psychology.	0.093	0.079	0.02	0.75	0	1	0	0	0	0.659	0
415	Journal of Consumer Policy	0342-5843	1573-0631	Strategy & International Business	Economics, Econometrics and Finance	Springer	C	Q2	1.6	4.7	0.616	56	2.29	2 categories: Consumer + Policy	48	Quarterly	400		68	2.61975	47.7	69.3	20.8	8000	14–28	7	0	2080	Moderate	Hybrid	0		https://link.springer.com/journal/10603	No	1977	48	No	Publishes research on consumer policy, law, and regulation, addressing issues like consumer rights, protection, and welfare.	0.153	0.214	0.065	1	0.141	1	0	0	0	0.982	0.98
581	Environment Systems and Decisions	2194-5403	2194-5411	Entrepreneurship & Innovation		Springer		Q2	2.6	3.2	0.65	61		2 category: Policy & Law	12	Quarterly	400		68	2.61975	77.1	70.1	30.2	8000	14–28	4	0	3630	Moderate	Hybrid	0		https://link.springer.com/journal/10669	No	2013	12	No	Focuses on the systems approach to environmental problems and the application of decision science to policy and management.	0.358	0.353	0.1	1	0.194	1	0	0	0	0.991	1
286	Journal of Anthropological Archaeology	0278-4165	1090-2471	Accounting & Finance	Arts and Humanities	Elsevier		Q1	2.2	3.7	0.902	77	1.94	1 category: Archaeology	43	Quarterly	400		68	2.61975	52.3	65.9	18.7	8000	14–28	6	15	3370	Moderate	Hybrid	12		https://www.sciencedirect.com/journal/journal-of-anthropological-archaeology	No	1982	43	No	Focuses on research that uses archaeological data to examine general anthropological problems.	0.246	0.291	0.224	1	0	1	0	0	0	0.944	0
91	Queueing Systems	1572-9443	1572-9443	Business & Management (General)	Decision Sciences	Springer		Q2	0.7	2.2	0.691	55	1.29	1 category: Queueing Theory	39	Monthly	400		68	2.61975	62.9	69.6	19.4	8000	14–30	11	0	3290	Lengthy	Hybrid	0		https://link.springer.com/journal/11134	No	1986	39	No	Focuses on the theory, application, and modeling of queueing systems, probability theory, and stochastic processes.	0.086	0.103	0.065	1	0	1	1	0	0	0.979	0.865
616	Digital Finance	2562-5060	2562-5079	Business & Management (General)		Springer		Q2		4.9	0.5	13		Specialized	6	Quarterly	400		70	2.62027	65.2	72.3	16.4	8000	14–30	3	0	2900	Lengthy	Hybrid	12		https://link.springer.com/journal/42521	No	2019	6	No	Focuses on research on FinTech, digital transformation in finance, and the impact of technology on financial services and markets.	0.03	0.062	0.03	0.5	0.447	0.952	1	1	0	0.982	0
791	Journal of Revenue and Pricing Management	1476-733X	1758-5779	Business & Management (General)	Economics, Econometrics and Finance	Springer		Q3	1.5	2.4	0.454	27	1.6	1 category: Revenue	23	Quarterly	400		70	2.62027	56.9	69.1	20.8	8000	14–30	12	0	2670	Moderate	Hybrid	12		https://www.palgrave.com/gp/journal/41272	Yes	2002	23	No	Focuses on research on revenue management, pricing strategy, and dynamic pricing in various industries.	0.216	0	0	0	0.788	1	1	0	0	0.903	0.791
595	Operations Management Research	1936-9737	1937-0240	Business & Management (General)	Engineering	Springer	C	Q1	5.3	5	0.794	35	5.72	1 category: Operations	17	Quarterly	400		72	2.62079	75.9	73.3	24.1	8000	14–30	28	0	3890	Lengthy	Hybrid	0		https://link.springer.com/journal/12063	Yes	2008	17	No	Focuses on research that links operations management theory with practical relevance in manufacturing and service industries.	0.104	0	0	0	0	1	0	0	0	0.862	0
531	Labour Economics	0927-5371	1872-6292	Business & Management (General)	Economics, Econometrics and Finance	Elsevier	A	Q1	2.6	2.8	1.479	85	2.41	Specialized	31	Quarterly	900	12	82	2.62105	48.9	74.1	33.2	8000	30–60	12	8	4000	Moderate	Hybrid	0		https://www.sciencedirect.com/journal/labour-economics	No	1994	31	No	Publishes high-quality research on labor economics, covering labor markets, wages, employment, and human capital.	0.071	0.07	0.018	0.75	0	1	1	0	0	0.865	0
944	Qualitative Research	1468-7941	1741-315X	Economics	Arts and Humanities	Sage		Q1	2.9	6.8	1.511	86	3.97	1 category: Qualitative	24	Quarterly	1000	12.6		2.622	47.6	73	39.6	8000		75	31		Moderate		0		https://journals.sagepub.com/home/qrj	No	2001	24	No	Dedicated to the development and practice of qualitative research methods across the social sciences.	0.086	0.188	0.122	1	0.472	0.952	1	1	0	0.985	0
577	Cluster Computing	1386-7857	1573-7563	Information Systems & Digital Business	Computer Science	Springer		Q1	4.1	7	0.618	63	5.3	1 category: Cluster	27	Quarterly	1500	18	68	2.6221	79.5	70.4	33.7	8000	14–28	10	0	3190	Moderate	Hybrid	0		https://link.springer.com/journal/10586	No	1998	27	No	Focuses on research on cluster computing, parallel processing, and distributed systems.	0	0	0	0	0	1	1	0	0	0.856	0
1054	Journal of Manufacturing Technology Management	1741-0382	1758-6902	HRM & Organizational Behavior	Computer Science	Emrald	B	Q1	6	15.7	2.083	84	9.77	2 categories: Manufacturing + Management	29	Bimonthly	800	10.3	70	2.6223	79.3	79.8	50.1	8000	14–30	27	0	3400	Moderate	Hybrid	12		#N/A	Yes	1996	29	No	Focuses on the management of manufacturing technology, operations, and supply chains, emphasizing strategic and organizational issues.	0.06	0	0	0	0	1	0	0	0	0.871	0.892
656	Journal of Money, Credit and Banking	0022-2879	1538-4616	Business & Management (General)	Economics, Econometrics and Finance	Wiley	A*		1.6	2.7	1.501	119	1.71	0	56	7 per year	1000	12.5		2.625	82.9	76.7	24.8	8000		0	0	3990	Lengthy	Hybrid	0		https://onlinelibrary.wiley.com/journal/15384616	No	1969	56	No	A premier journal publishing research on money, banking, credit, and macro-financial linkages.	0.075	0	0	1	0	1	0	0	0	0.918	0
721	International Journal of Retail & Distribution Management	0959-0552	1758-6503	Business & Management (General)		Emrald	A		5.5			86		1 category: Retail	54	Quarterly	1000	12.9	68	2.63077	66.8	73.3	29.2	8000	14–28	7	0	2010	Moderate	Hybrid	12		https://www.emeraldgrouppublishing.com/journal/ijrdm	No	1971	54	No	Focuses on research into the management of retailing, wholesaling, and distribution channels across the globe.	0.086	0.075	0.031	0.75	0	1	0	1	0	0.888	0.899
369	Managerial and Decision Economics	1099-1468	1099-1468	Marketing	Business, Management and Accounting	Wiley	B	Q2	2.7	2.3	0.419	57	2.31	Specialized	45	Quarterly	800	10	70	2.63107	75.3	69.7	21.9	8000	14–30	11	0	4030	Moderate	Hybrid	0		https://onlinelibrary.wiley.com/journal/10991468	No	1980	45	No	Publishes research on the application of economic analysis to managerial decision-making and business strategy.	0.071	0	0	0	0	1	0	0	0	0.944	0
168	International Journal of Industrial Organization	0167-7187	1873-0401	Business & Management (General)	Economics, Econometrics and Finance	Elsevier	A	Q1	1.4	3.3	1.388	91	1.45	Specialized	42	Monthly	800	10	78	2.63316	79.6	73	24.6	8000	30–60	14	6	4100	Lengthy	Hybrid	0		https://www.sciencedirect.com/journal/international-journal-of-industrial-organization	No	1983	42	No	Focuses on research on the structure, conduct, and performance of industries, including firm strategy, competition, and regulation.	0.052	0.048	0.014	0.75	0	1	1	0	0	0.85	0
891	Entrepreneurship & Regional Development	0898-5626	1466-4533	Engineering & Technology		T&F		Q1	3.6		1.56			Multi Category	36	Quarterly	700	8	65	2.6345	52	72.6	34.1		10-15	11	13	1030	Lengthy		0		https://www.tandfonline.com/journals/tepn20	Yes	1989	36	No	Focuses on the role of entrepreneurship and small business in regional economic development, policy, and innovation.	0.276	0.159	0.084	1	0.744	1	1	0	0	0.915	0
60	European Management Journal	1873-5681	1873-5681	Engineering & Technology	Business, Management and Accounting	Elsevier	B	Q1	7.3	10.9	1.625	117	7.93	2 categories: Business + Management	44	Bimonthly	1200	15	68	2.6351	58	73.3	24.8	8000	14–28	3	4		Lengthy		0		#N/A	No	1981	44	No	Publishes high-quality research that advances the understanding of management and organization theory and practice, with a particular focus on European contexts and global issues.	0.045	0.089	0.03	0.5	0	1	1	0	0	0.95	0
1013	International Journal of Research in Marketing	1873-8001	1873-8001	Business & Management (General)	Business, Management and Accounting	Elsevier	A*	Q1	7.5	10.9	3.896	115	7.5	1 category: Marketing	41	Quarterly	1200	15	80	2.63824	50.8	80.6	44.6	8000	30–60	11	3	4200	Moderate	Hybrid	0		#N/A	No	1984	41	No	A top-tier journal publishing articles on marketing strategy, theory, and research methodologies, emphasizing quantitative, empirical, and modeling approaches.	0	0	0	0	0.583	1	1	0	0	0.879	0
181	Journal of International Marketing	1069-031X	1547-7218	Marketing	Economics, Econometrics and Finance	Sage	A	Q1	4.2	9.1	2.088	102	5.42	1 category: International Marketing	32	Quarterly	600	5.7	75	2.63945	59.6	72.6	26.8	8000	21–45	27	54	3000	Lengthy	Hybrid	12		https://journals.sagepub.com/home/jim	No	1993	32	No	Publishes high-quality research on international marketing issues, including cross-cultural consumer behavior and global strategy.	0.056	0.055	0.018	0.75	0.391	1	0	0	0	0.856	0
701	Employee Relations: The International Journal	0142-5455	1758-701X	Entrepreneurship & Innovation		Emrald		Q2	3.2		0.87			1 category: Employee	47	Quarterly	800	9.7	70	2.63984	52	67.6	13.2	8000	14–30	55	0	2500	Moderate	Hybrid	0		https://www.emeraldgrouppublishing.com/journal/er	No	1978	47	No	Publishes research on employee relations, industrial relations, and human resource management internationally.	0.086	0.108	0.038	1	0	1	1	0	0	0.971	0.993
[truncated: 189 more rows]
[truncated: 12 more columns]

## Sheet: Tukeypostadhoc
Clusters	Difference	p.value	Significance
2-1	-7.884	0	***
3-1	-13.267	0	***
4-1	-19.726	0	***
3-2	-5.383	0	***
4-2	-11.842	0	***
4-3	-6.459	0	***

## Sheet: clusteroutput
Final_Tier	N	`Mean ± SD`	`Median (IQR)`	Range
Tier 1	131	59.39 ± 3.206	58.47 (4.03)	55.51 –72.75
Tier 2	307	51.506 ± 1.838	51.08 (2.99)	48.84 –55.4
[truncated: 2 more rows]

## Sheet: randtestoutput
- Loading Data from Data1.xlsx ---
[truncated: 8 more rows]

## Sheet: sseoutput
		K (Clusters)	SSE (Sum of Squared Errors)	SST (Total Sum of Squares)	𝐑𝟐 Variance Explained
[truncated: 4 more rows]

[truncated: 11 more sheets: optimalclusters, publishervariance, Formula_Weightages, cfaoutputr, pca, multigroupcfa, montecarlo, silhouette, anovapublishercluster, Sources, Data_Used]
